# Supplementary material
Source: PubMed Central journal article supplement (PMC2973884)

Representative sections showing structure location before  
and after laser capture microdissections

C57 strain on left, comparison strain on right

# C57 -- L2,L5,L6,RT,CP -- CAST

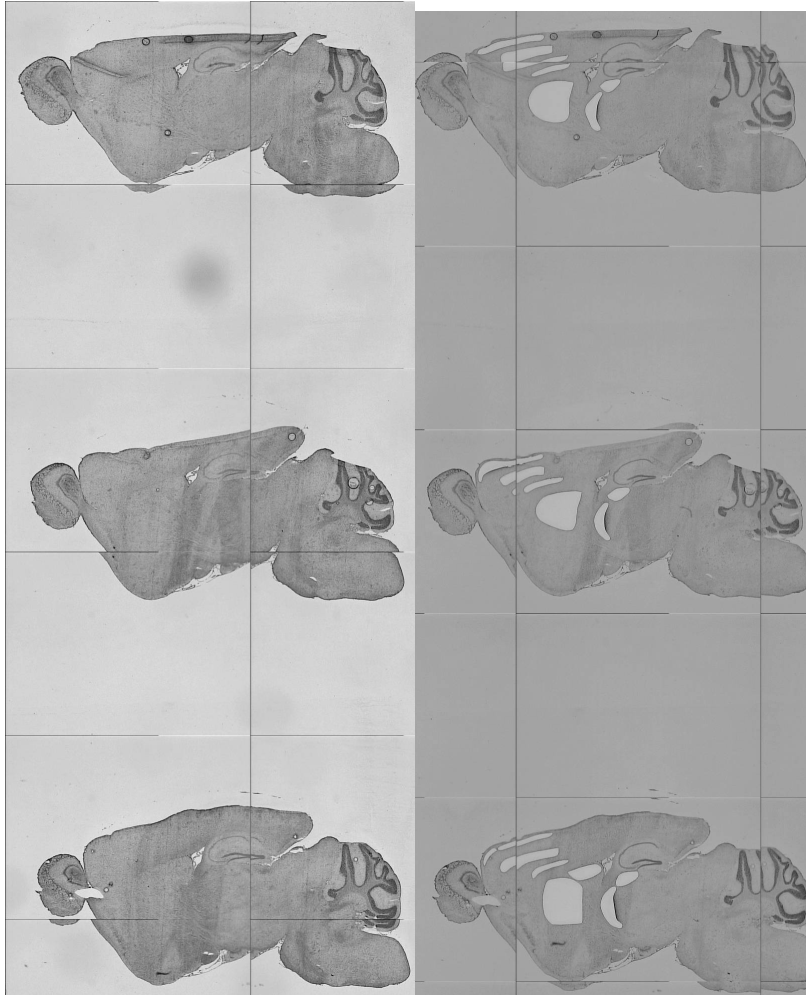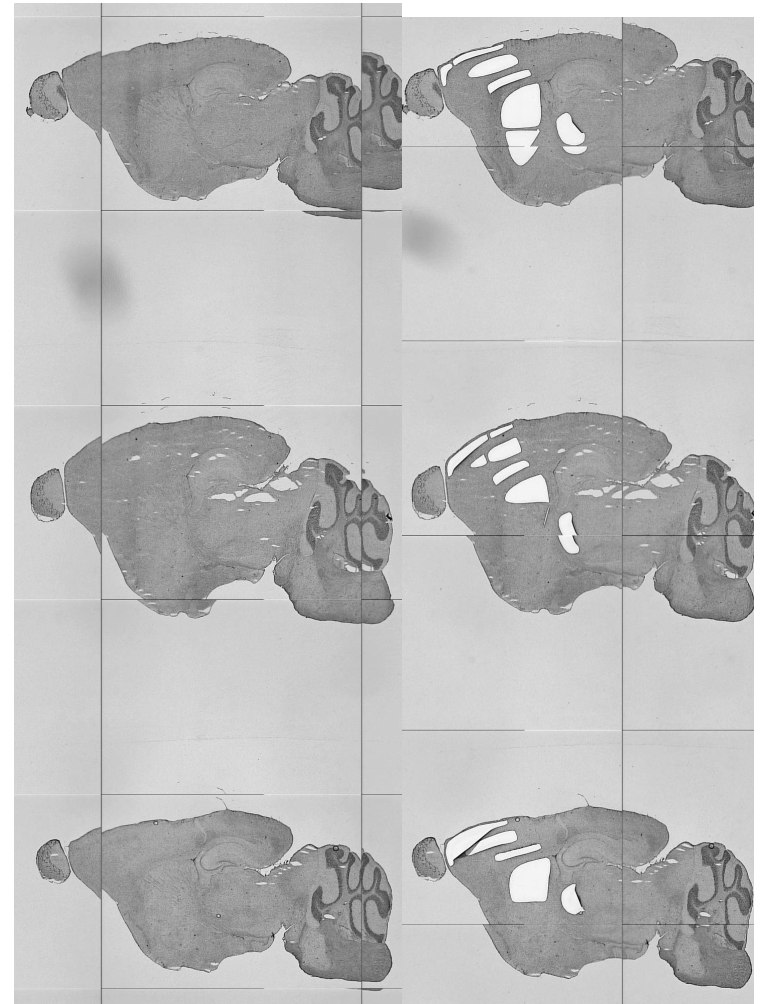

# C57 -- ENT -- DBA

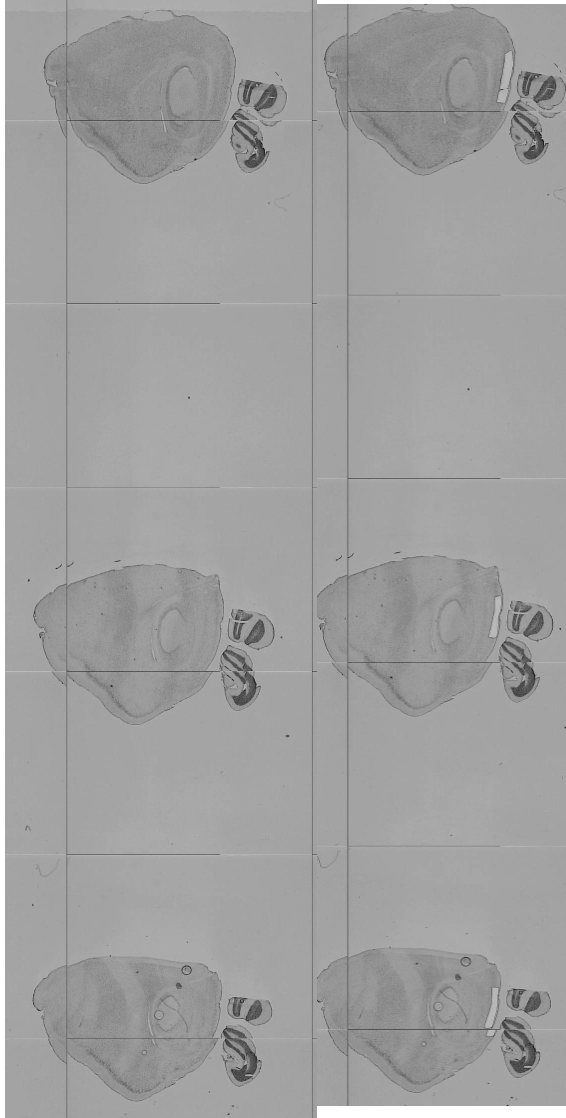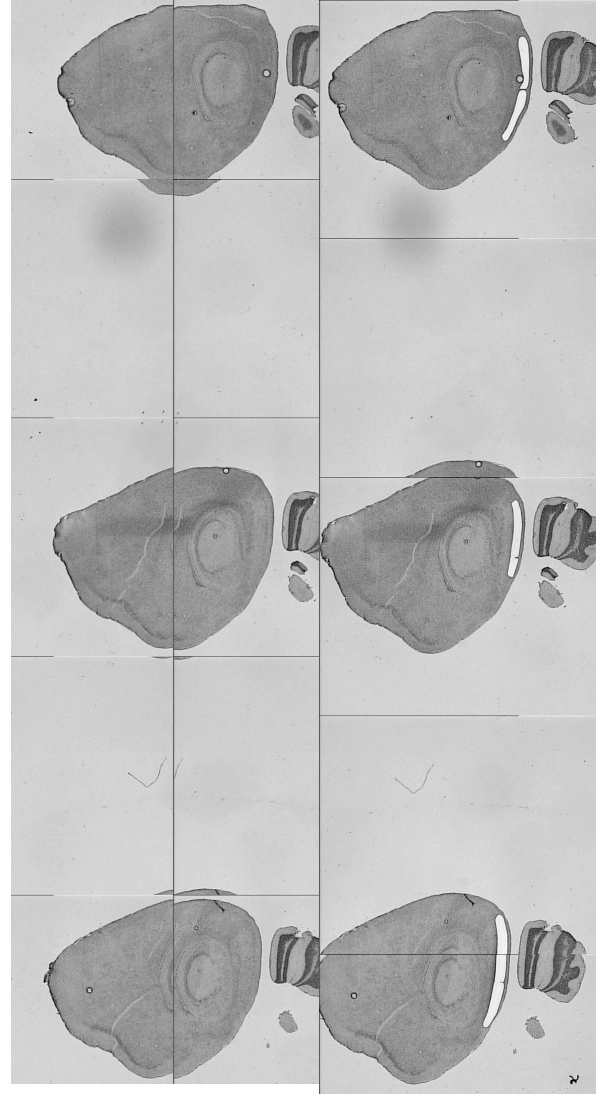

# C57 -- LD -- DBA

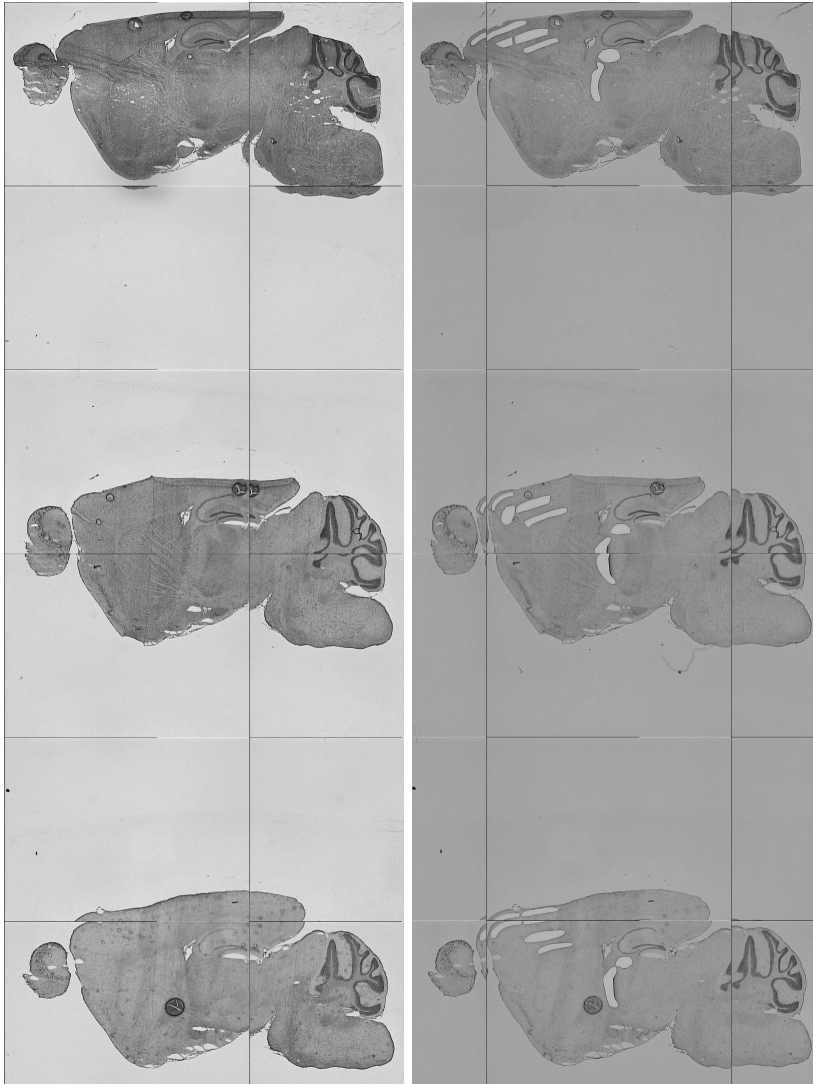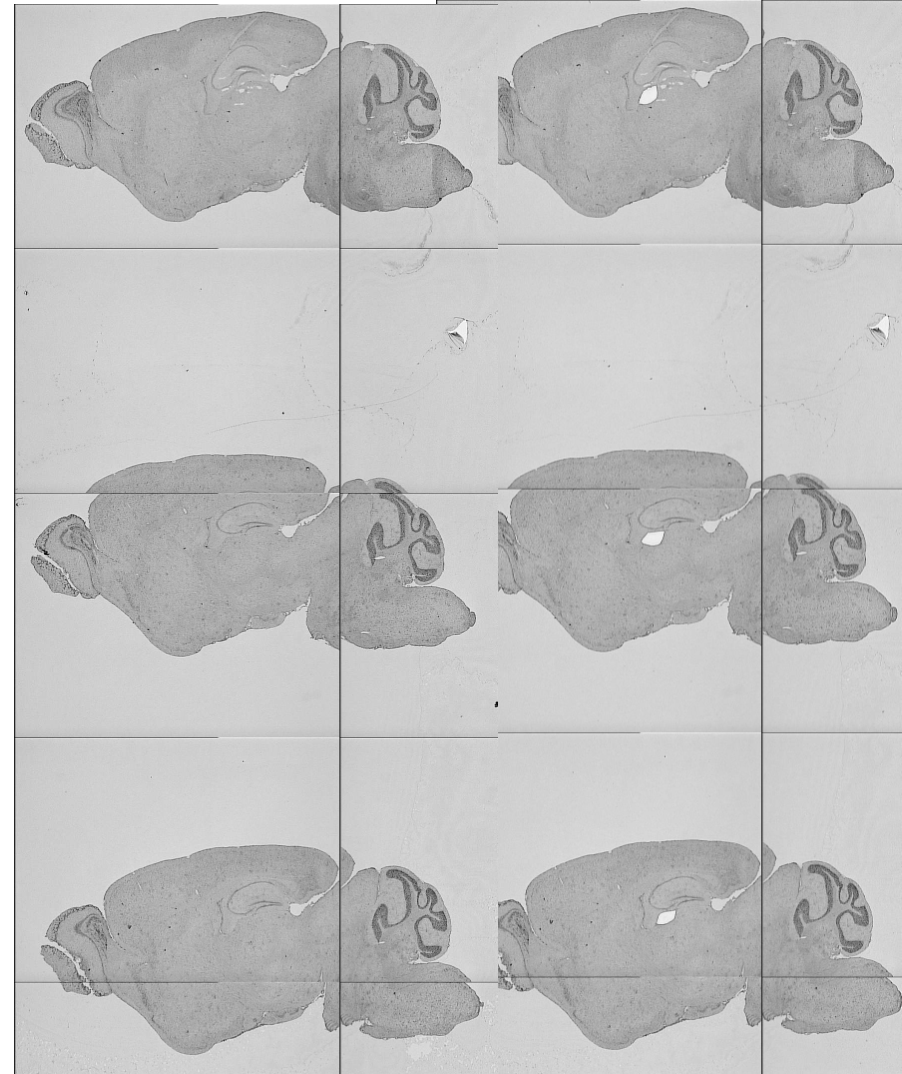

# C57 -- CLA -- SPRET

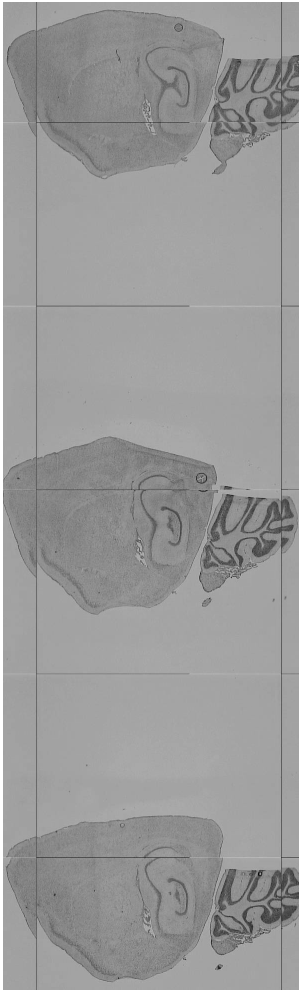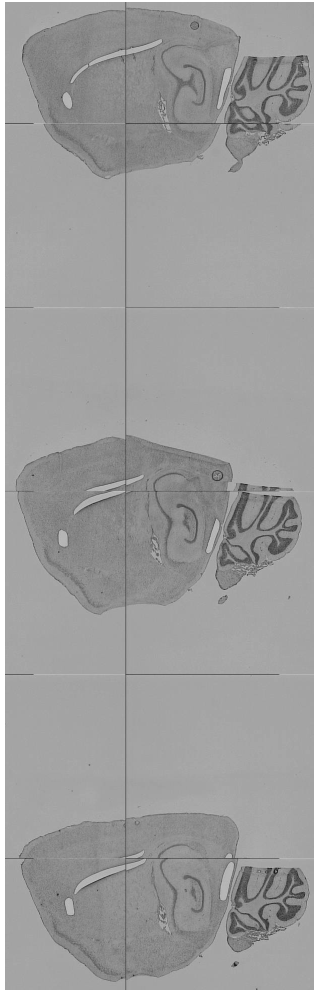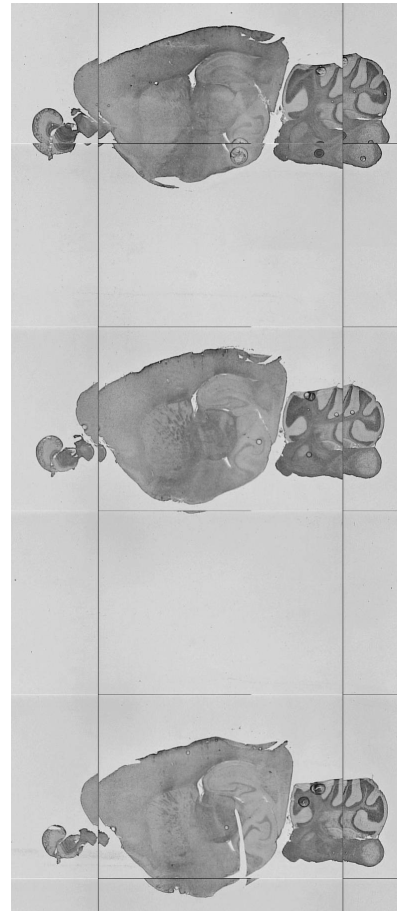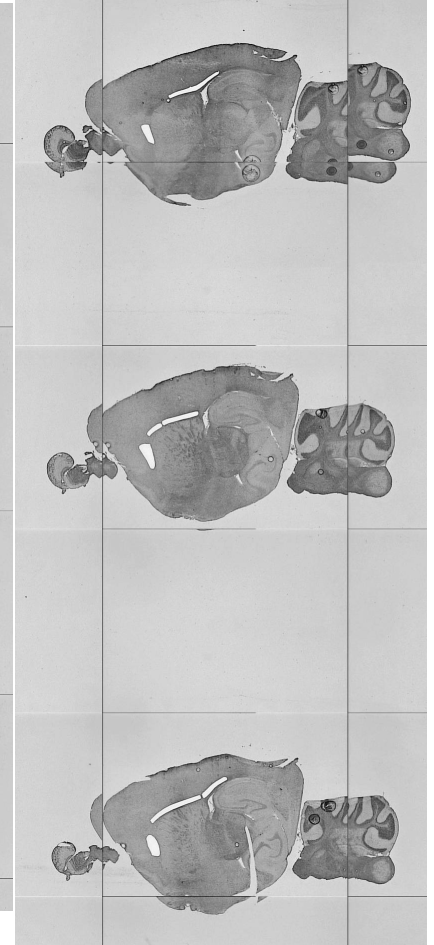

# C57 -- SCH -- SPRET

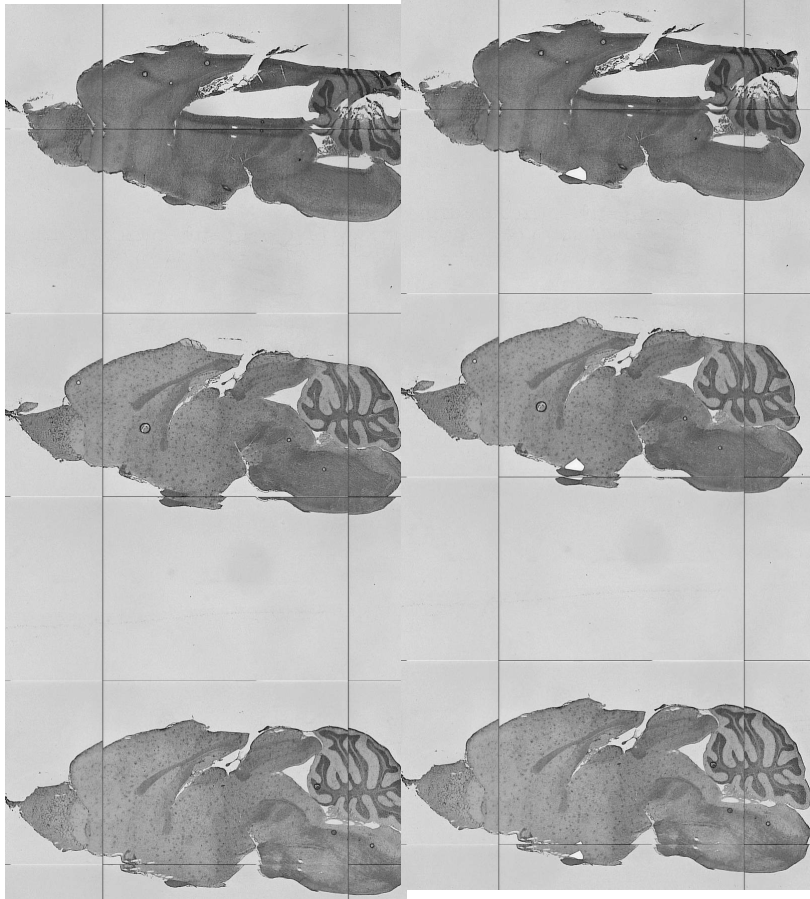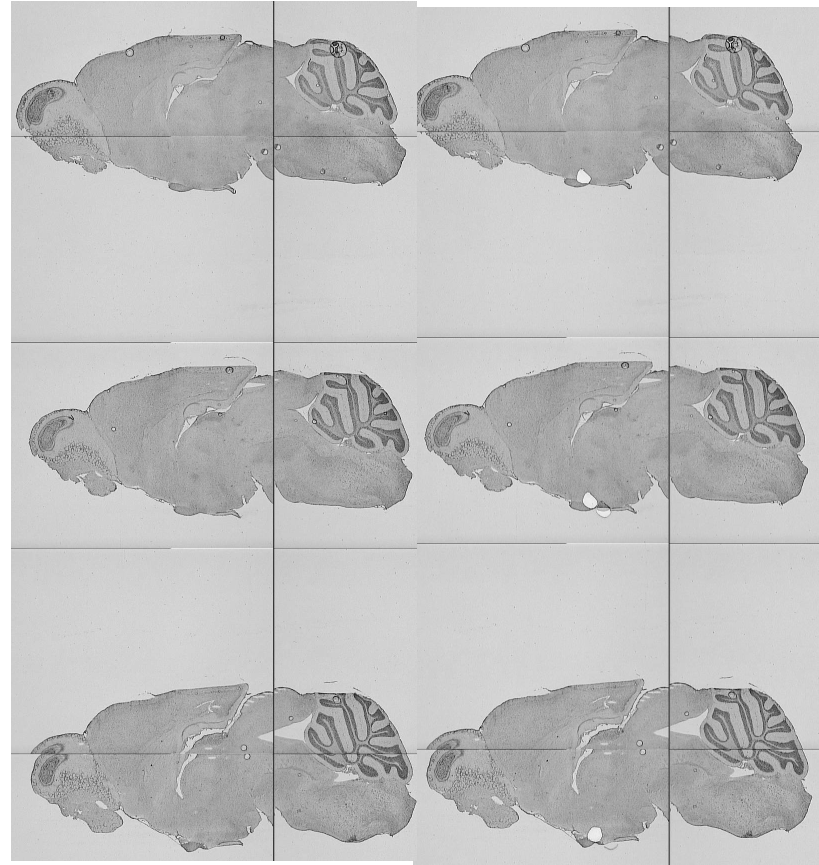

# C57 -- 6b -- SPRET

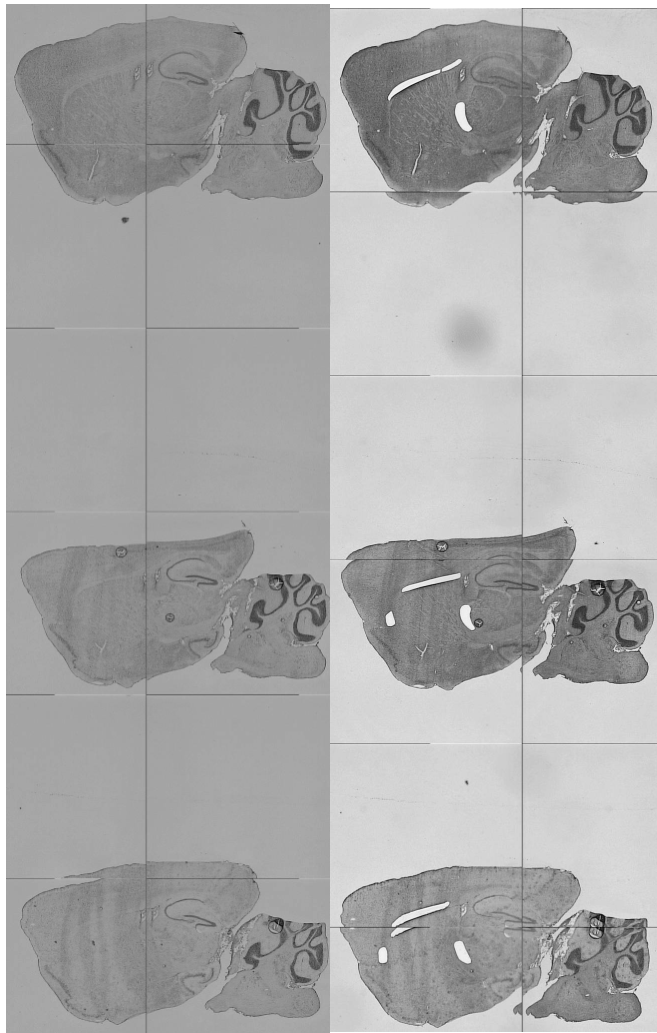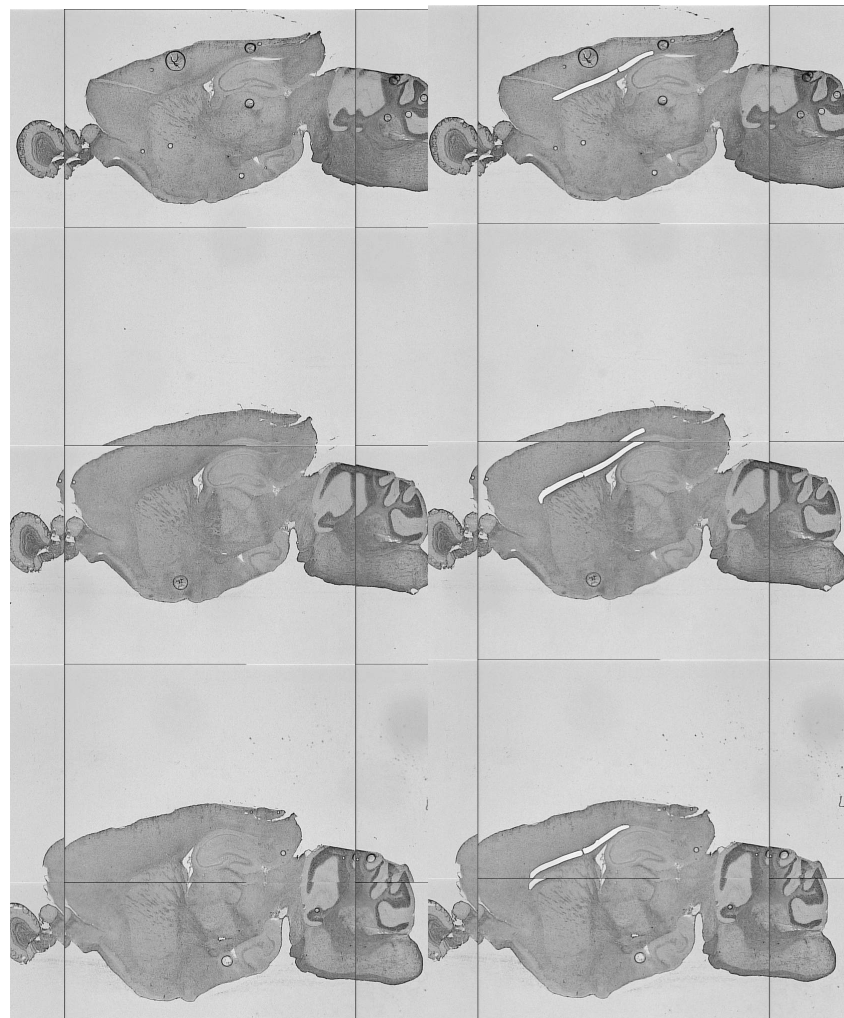

# C57 -- AD -- CAST

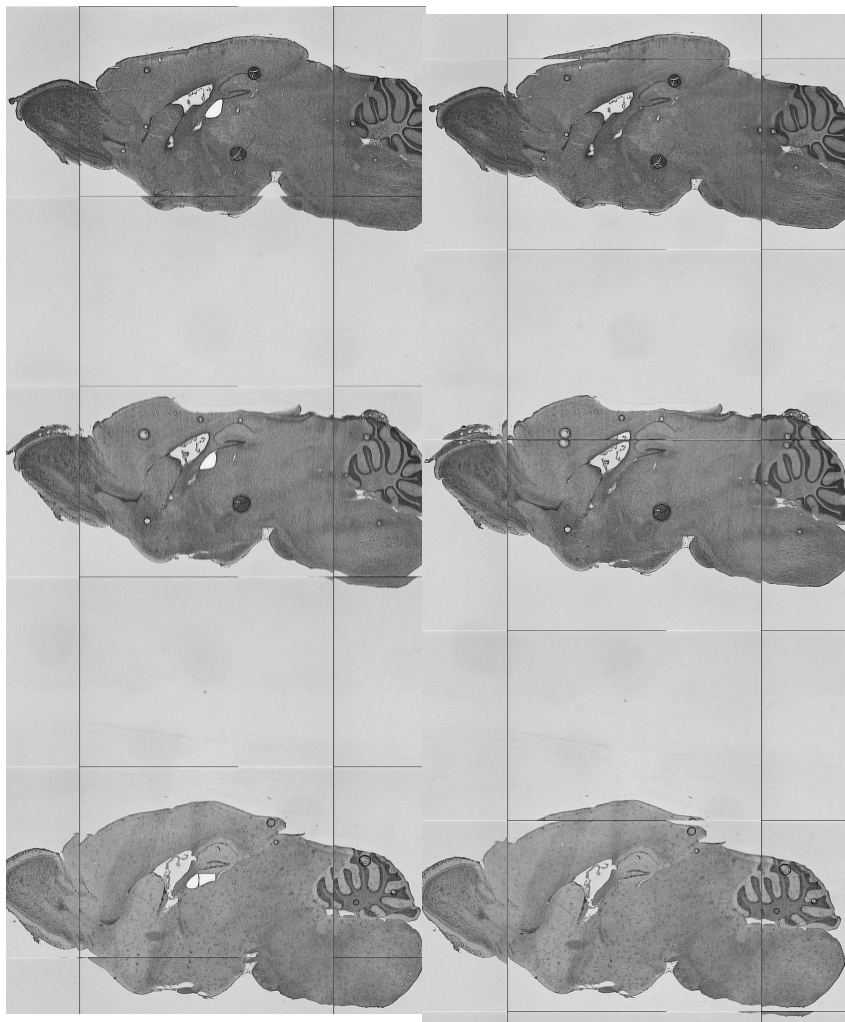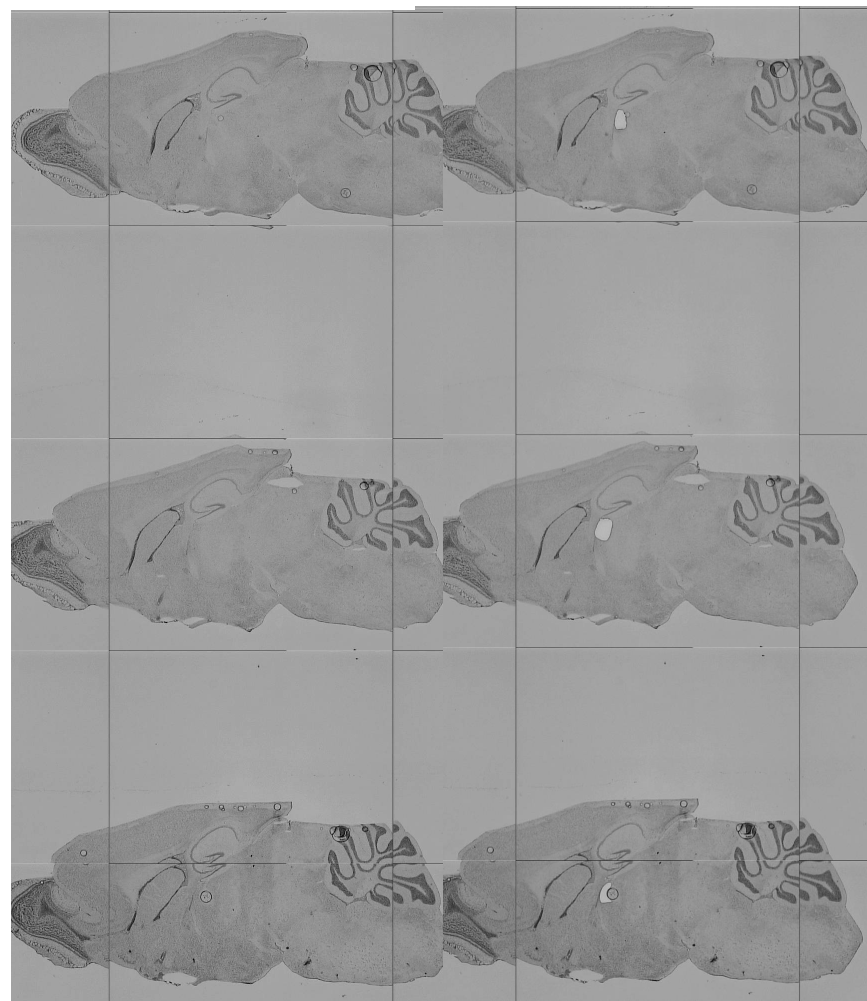

Supplement: 1003732107_sfig06.pdf [file 1003732107_sfig06.pdf]
