# Supplementary material
Source: PubMed Central journal article supplement (PMC2973884)
Supplement: 1003732107_sfig01.pdf [file 1003732107_sfig01.pdf]

## Supplemental Fig 1

- Strain differences are depicted below and summarized in a table of contents. Each panel caption states the type (density, intensity, or both) and direction of difference (solid arrows indicate increased, dashed arrows decreased, expression relative to C57. Subtle differences may be best appreciated by consulting the original data available at <http://www.brain-map.org>

| GENE    | SUMMARY                      | PAGE | GENE      | SUMMARY                               | PAGE |
|---------|------------------------------|------|-----------|---------------------------------------|------|
| Ache    | PO: ... < DBA, Spret, WSB    | 2    | AcheHtr1a | SUB: ... < Spret, PWD                 | 43   |
| Ache    | CBX(gr): ... < PWD           | 3    | Htr1a     | VIS(5): Spret < ...                   | 44   |
| Adra2a  | DG(po): ... < WSB            | 4    | Htr1a     | RSPd(5): Spret < ...                  | 45   |
| Adra2a  | CBX(gr): ... < PWD           | 5    | Htr1a     | CP: ... < Cast, Spret                 | 46   |
| Agtr1a  | PVH: Spret, PWD < ...        | 6    | Htr1a     | FN: Spret < ...                       | 47   |
| Bche    | ENTm: Spret, PWD < ...       | 7    | Htr1b     | PIR(2): Spret < ... < PWD             | 48   |
| Bche    | AD: ... < Cast, WSB          | 8    | Htr1b     | DG(po): C57 < ...                     | 49   |
| Bche    | LD: ... < Cast, PWD          | 9    | Htr1b     | POST: ... < PWD                       | 50   |
| Bche    | AV: ... < Cast               | 10   | Htr1b     | AV: Spret < ...                       | 51   |
| Bche    | RE: ... < Cast, PWD          | 11   | Htr2a     | MO(2/3): Cast < ...                   | 52   |
| Bche    | MH: ... < Cast               | 12   | Htr2a     | AD: Cast < ...                        | 53   |
| Bche    | PCG: Spret < ...             | 13   | Maob      | MOBmi: ... < PWD                      | 54   |
| Bche    | DMX: Spret < ...             | 14   | Maob      | MO(2/3): ... < PWD                    | 55   |
| Cyp19a1 | LS: Spret, WSB < ... < PWD   | 15   | Maob      | CTX(6b): Spret < ...                  | 56   |
| Drd1a   | CA2sp: ... < DBA, 129        | 16   | Maob      | LA: ... < PWD, WSB                    | 57   |
| Drd1a   | AD: ... < Spret              | 17   | Maob      | LSr: ... < Cast                       | 58   |
| Drd1a   | PB: Cast < ...               | 18   | Maob      | RE: ... < Spret                       | 59   |
| Drd2    | ENTl: ... < DBA              | 19   | Oprm1     | CP: ... < PWD                         | 60   |
| Drd2    | LD: DBA, Cast, Spret < ...   | 20a  | Oprm1     | MS: ... < PWD                         | 61   |
| Drd2    | AV: Cast, Spret < ...        | 20b  | Oprm1     | VAL: ... < Spret                      | 62a  |
| Egfr    | DG(sg): ... < Cast           | 21   | Oprm1     | VPL: ... < Spret                      | 62b  |
| Egfr    | PA: ... < Cast               | 22   | Pdgfrb    | PF: WSB < ...                         | 63   |
| Egfr    | LSc: ... < Cast, Spret       | 23   | Ppp3ca    | MG: C57, 129, PWD < ...               | 64   |
| Egfr    | SCs: ... < Spret             | 24   | Ptgs2     | TTv: DBA < ... < Cast                 | 65   |
| Esr1    | COAp: Spret < ...            | 25   | Ptgs2     | COA: DBA, WSB < ...                   | 66   |
| Esr1    | CA2sp: ... < PWD             | 26a  | Ptgs2     | CA3sp: Spret < ... < WSB              | 67a  |
| Esr1    | DG(po): ... < PWD            | 26b  | Ptgs2     | DG: DBA, PWD < ... < Spret            | 67b  |
| Esr1    | MO(2/3): ... < DBA           | 27   | Ptgs2     | VIS(2/3): DBA, WSB < ...              | 68   |
| Esr1    | PIR(2): ... < Spret          | 28   | Ptgs2     | CLA: WSB < ...                        | 69   |
| Esr1    | DR: Spret < ...              | 29   | Ptgs2     | IA: Cast < ...                        | 70   |
| Esr1    | AP: ... < Spret              | 30   | Scn10a    | EPd: ... < C57                        | 71   |
| Esr2    | CLA: Spret < ... < DBA, Cast | 31   | Scn10a    | CEA: Spret < ...                      | 72   |
| Esr2    | BLA: Spret, PWD < ...        | 32   | Slc6a1    | CBX(mo): Spret, PWD < ...             | 73   |
| Esr2    | RE: ... < Spret, PWD         | 33   | Th        | AOBgr: Cast, Spret, WSB < ...         | 74   |
| Esr2    | SCH: ... < Spret             | 34   | Th        | MOBgr: Spret < ...                    | 75   |
| Faah    | AOBmi: Cast < ...            | 35   | Th        | SUB: ... < PWD                        | 76   |
| Gabra3  | CBX(gr): ... < PWD           | 36   | Th        | CTX(6a): Cast, Spret < ...            | 77   |
| Gabrb1  | SCs: Spret < ...             | 37   | Th        | CP: Cast < ...                        | 78   |
| Gnrh1   | MPO: Cast < ...              | 38   | Th        | MEA: ... < PWD                        | 79   |
| Hrh1    | SCs: ... < Cast              | 39   | Th        | RT: 129, Spret, WSB < ... < Cast, PWD | 80   |
| Htr1a   | AOB: ... < PWD, WSB          | 40   | Th        | IC: Spret < ...                       | 81   |
| Htr1a   | MOBmi: Cast, PWD < ...       | 41   | Th        | NLL: ... < PWD                        | 82   |
| Htr1a   | CA3sp: ... < Spret, Cast     | 42   | Th        | DMX: ... < PWD                        | 83   |
| Htr1a   | SUB: ... < Spret, PWD        | 43   | Th        | CBX(purk): ... < C57                  | 84   |

## Ache

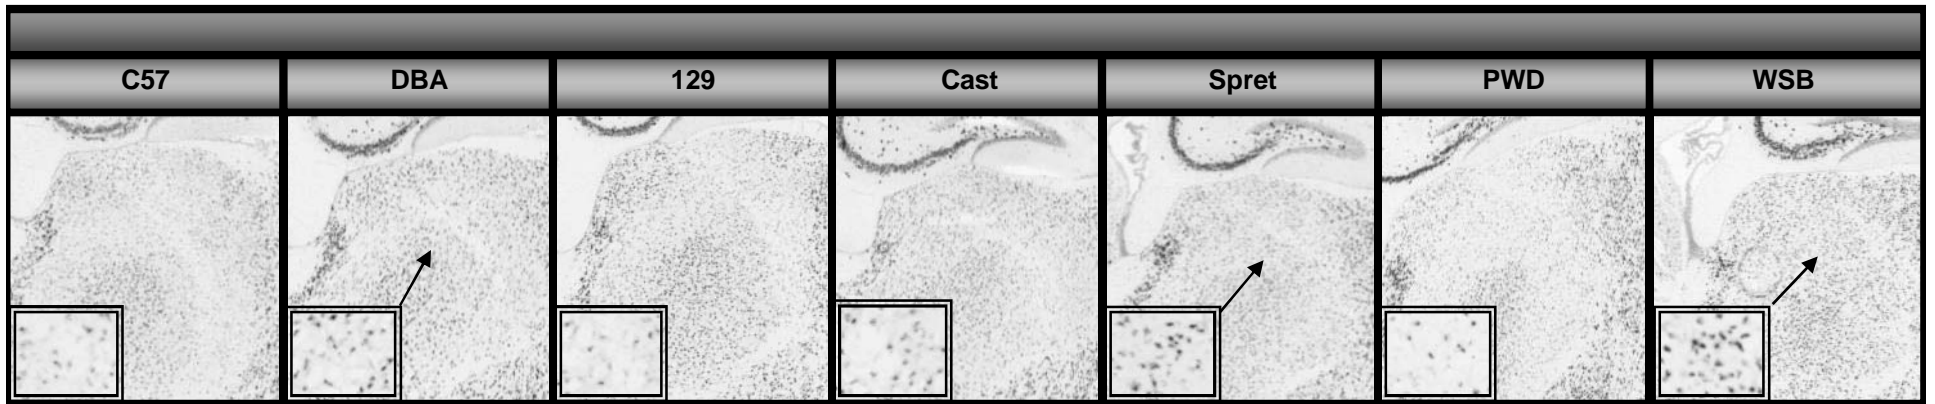

**PO: ... < DBA, Spret, WSB**

---

*The DBA, Spret, and WSB strains show greater intensity of acetylcholinesterase (Ache) expression in the posterior thalamic complex*

## Ache

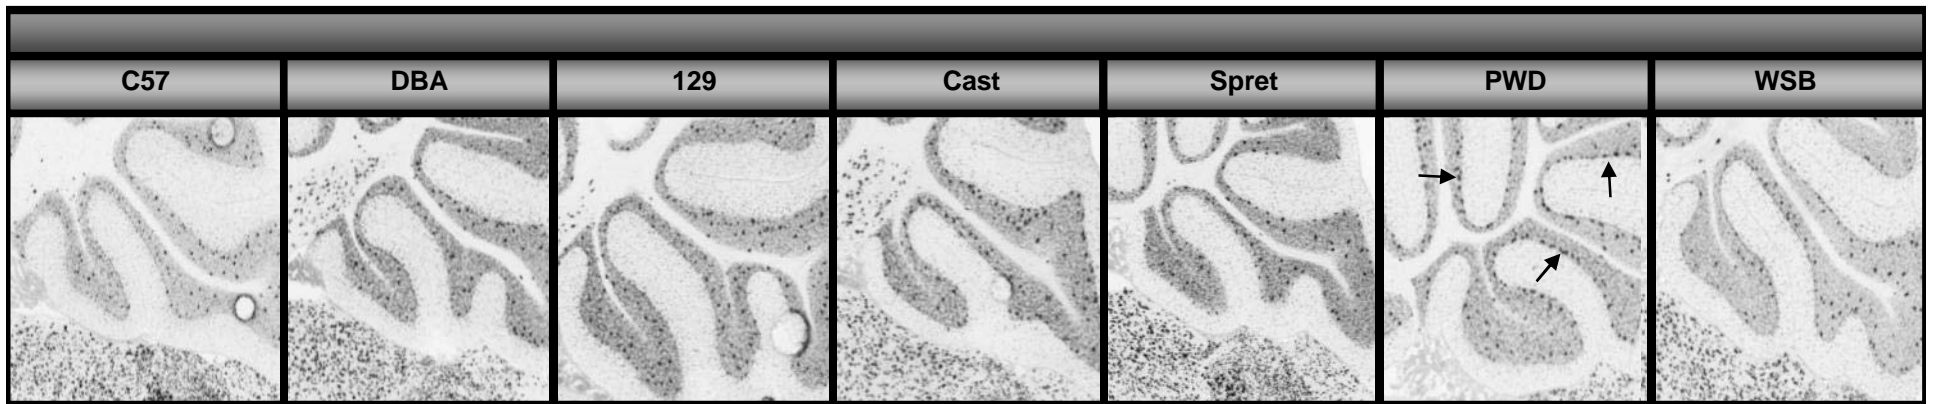

CBX(gr): ... < PWD

*The PWD strain shows greater density of acetylcholinesterase (Ache) expression in the cells lining the superficial portion of the cerebellar cortex granule layer*

## Adra2a

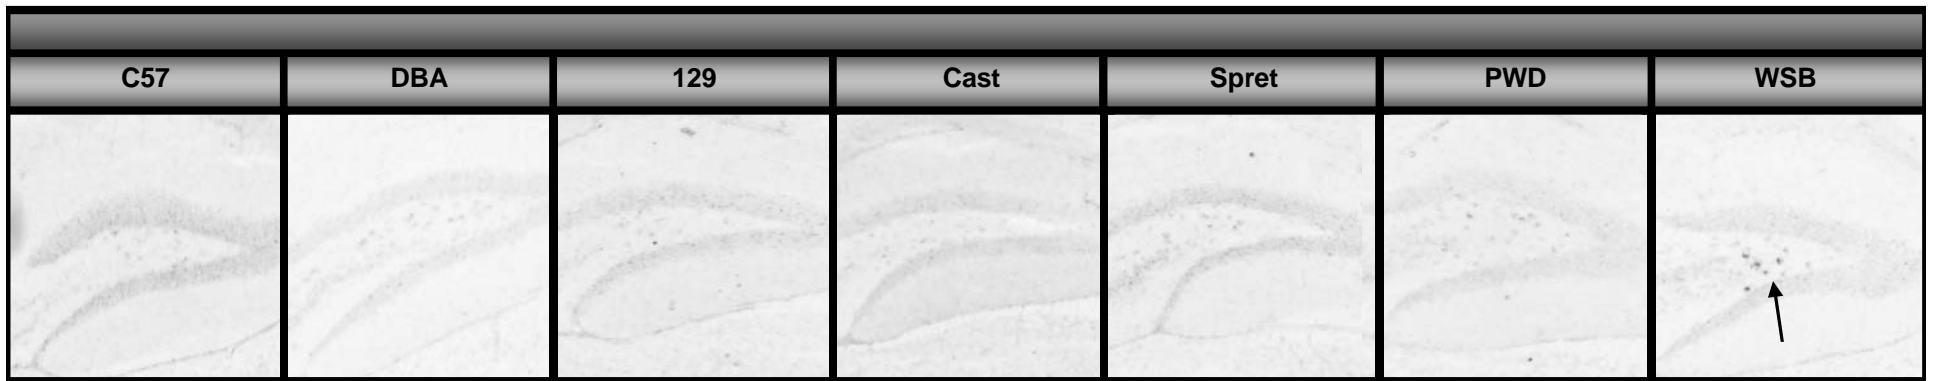

DG(po): ... < WSB

*The WSB strain shows greater density and intensity of adrenergic receptor, type 2a (Adra2a) expression in the dentate gyrus, polymorph layer*

## Adra2a

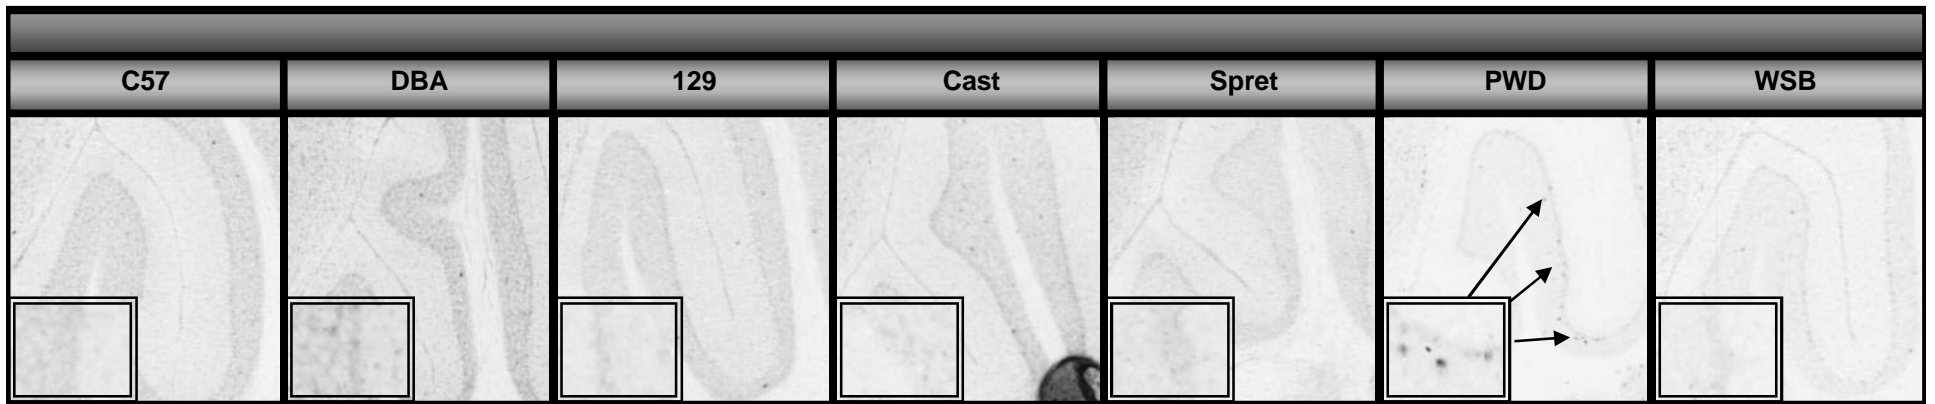

CBX(gr): ... < PWD

---

*The PWD strain shows greater density and intensity of adrenergic receptor, type 2a (Adra2a) in the superficial portion of the cerebellar cortex granule layer*

**Agtr1a**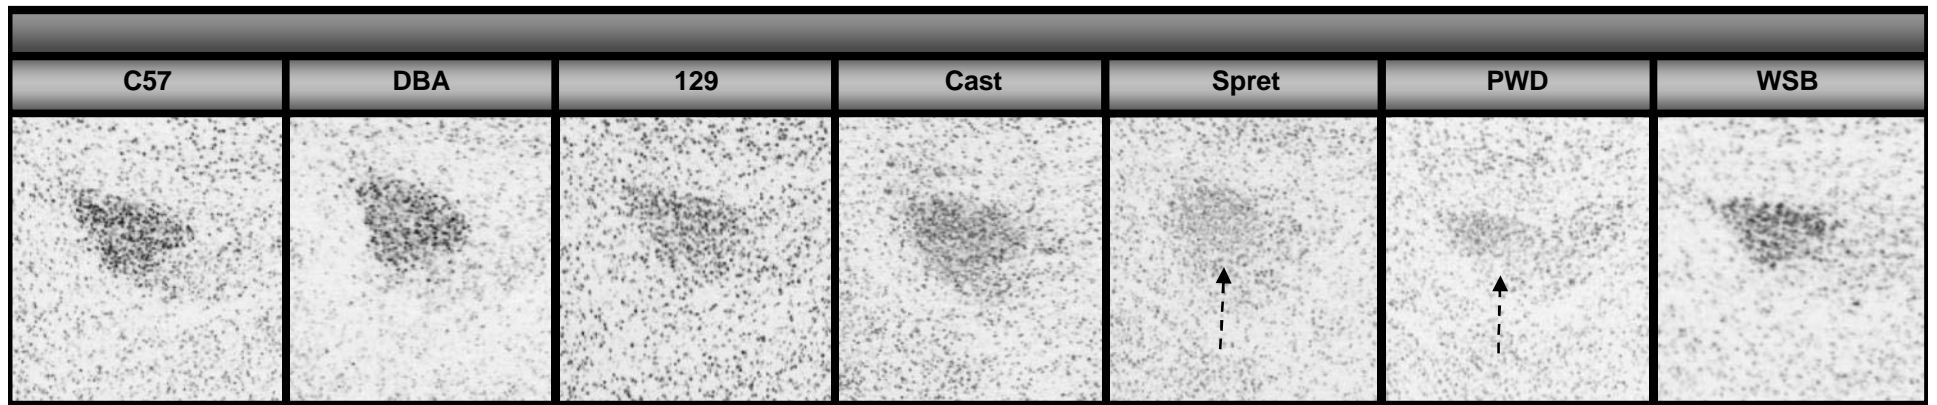

PVH: Spret, PWD < ...

---

*The Spret and PWD strains show lower intensity of angiotensin II receptor, type 1a (Agtr1a) expression in the paraventricular hypothalamic nucleus*

**Bche**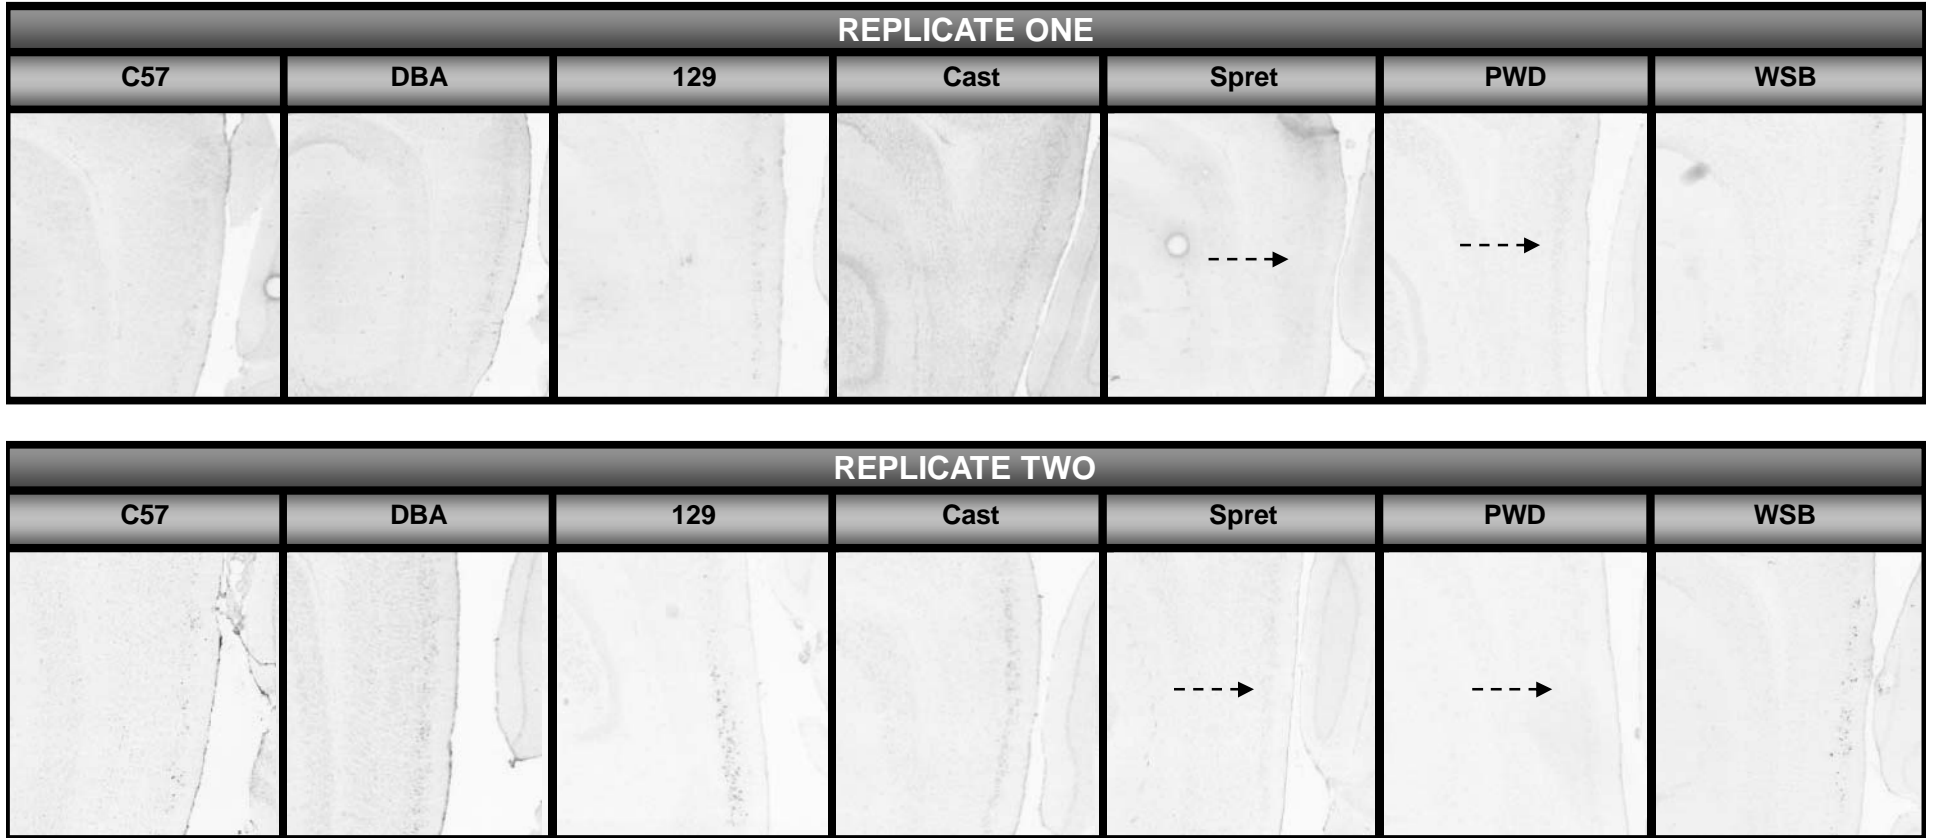

**ENTm: Spret, PWD < ...**

*The Spret and PWD strains show lower density and intensity of butyrylcholinesterase (Bche) expression in the entorhinal area, medial part, dorsal zone*



**Bche**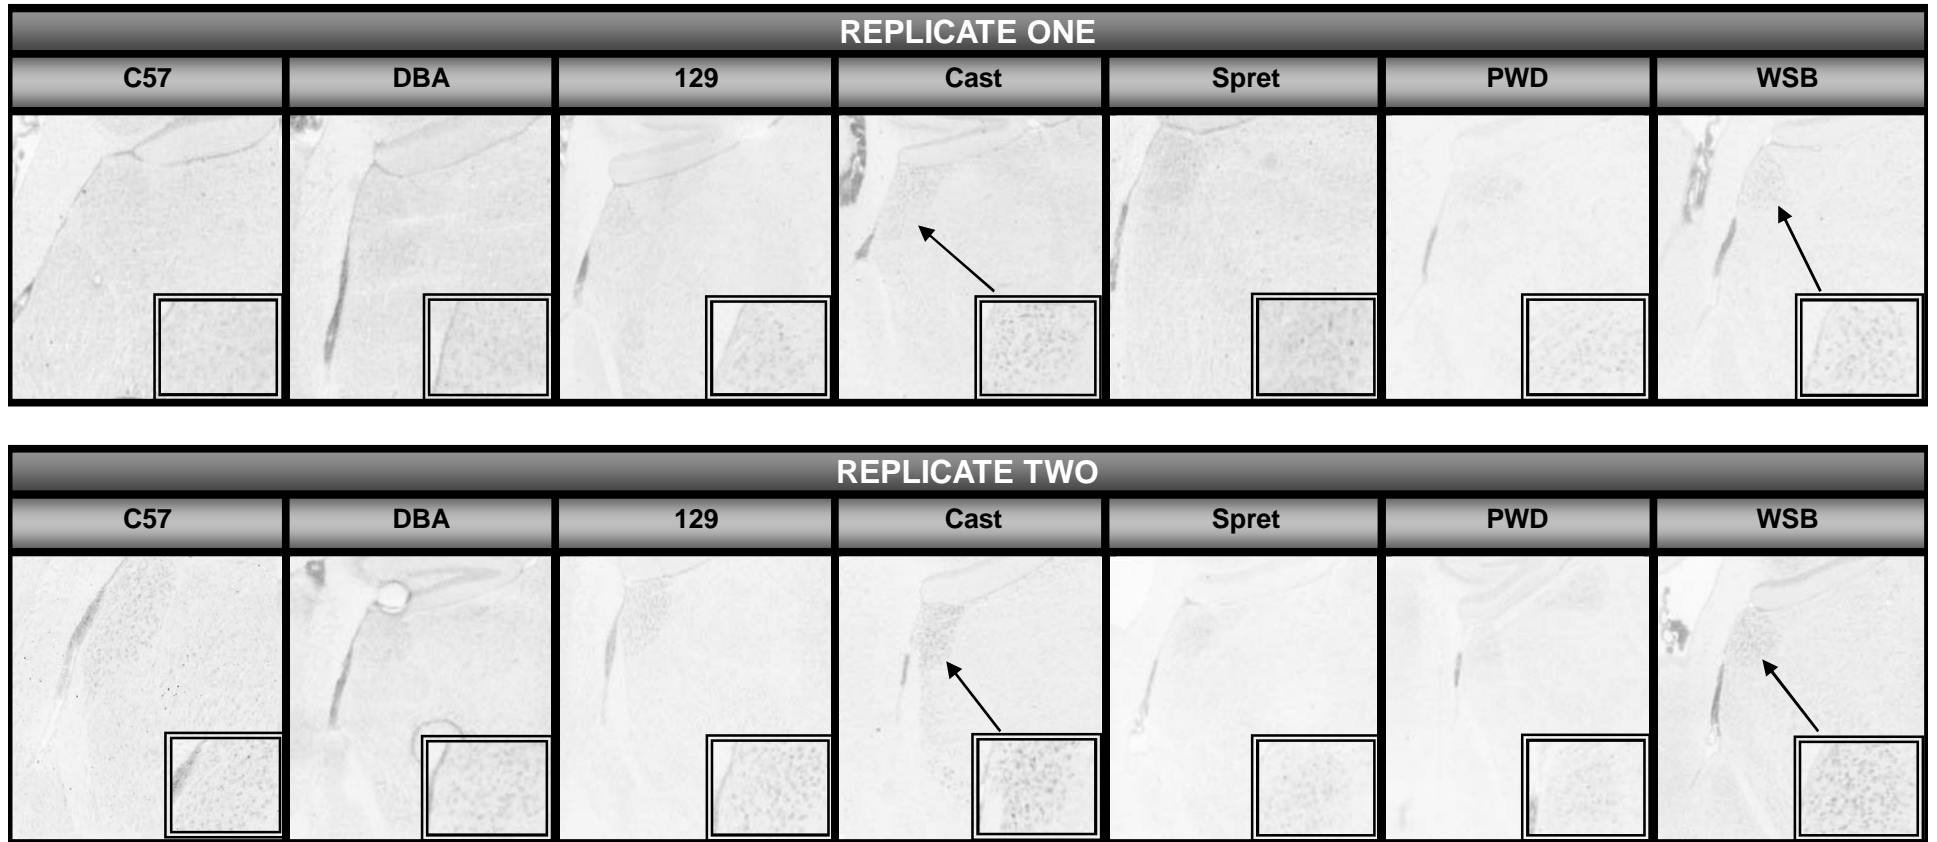

**AD: ... < Cast, WSB**

---

*The Cast and WSB strains show greater density and intensity of butyrylcholinesterase (Bche) expression in the anterodorsal nucleus*

**Bche**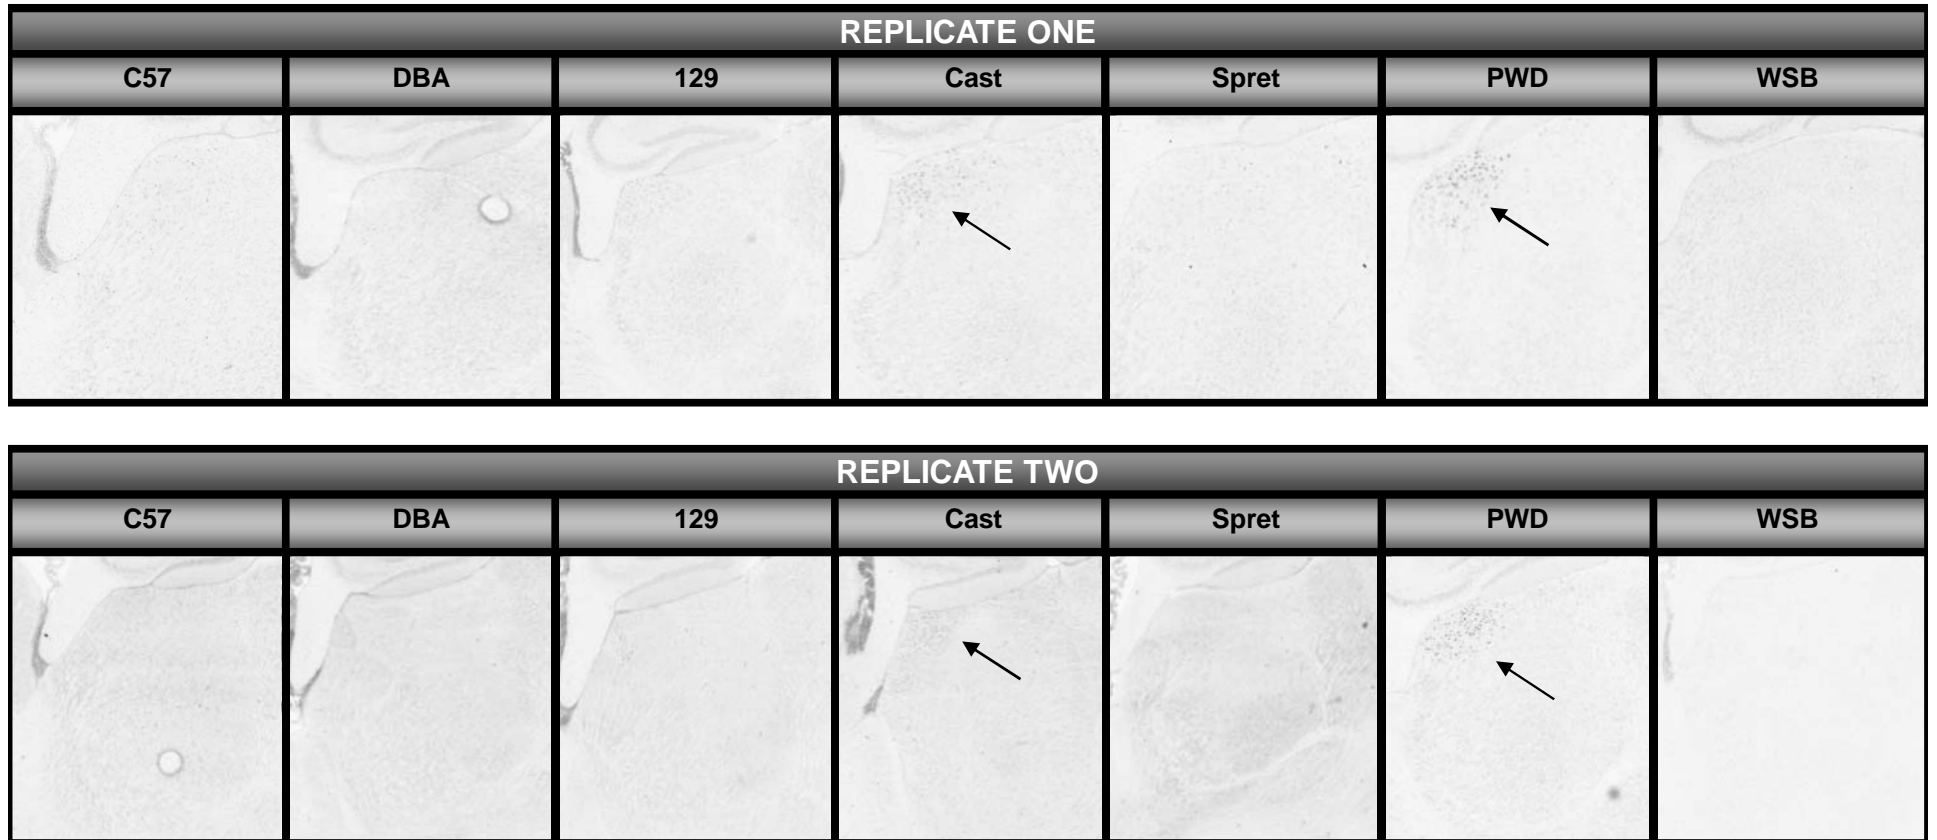

LD: ... < Cast, PWD

*The Cast and PWD strains show greater density and intensity of butyrylcholinesterase (Bche) expression in the lateral dorsal nucleus of thalamus*

**Bche**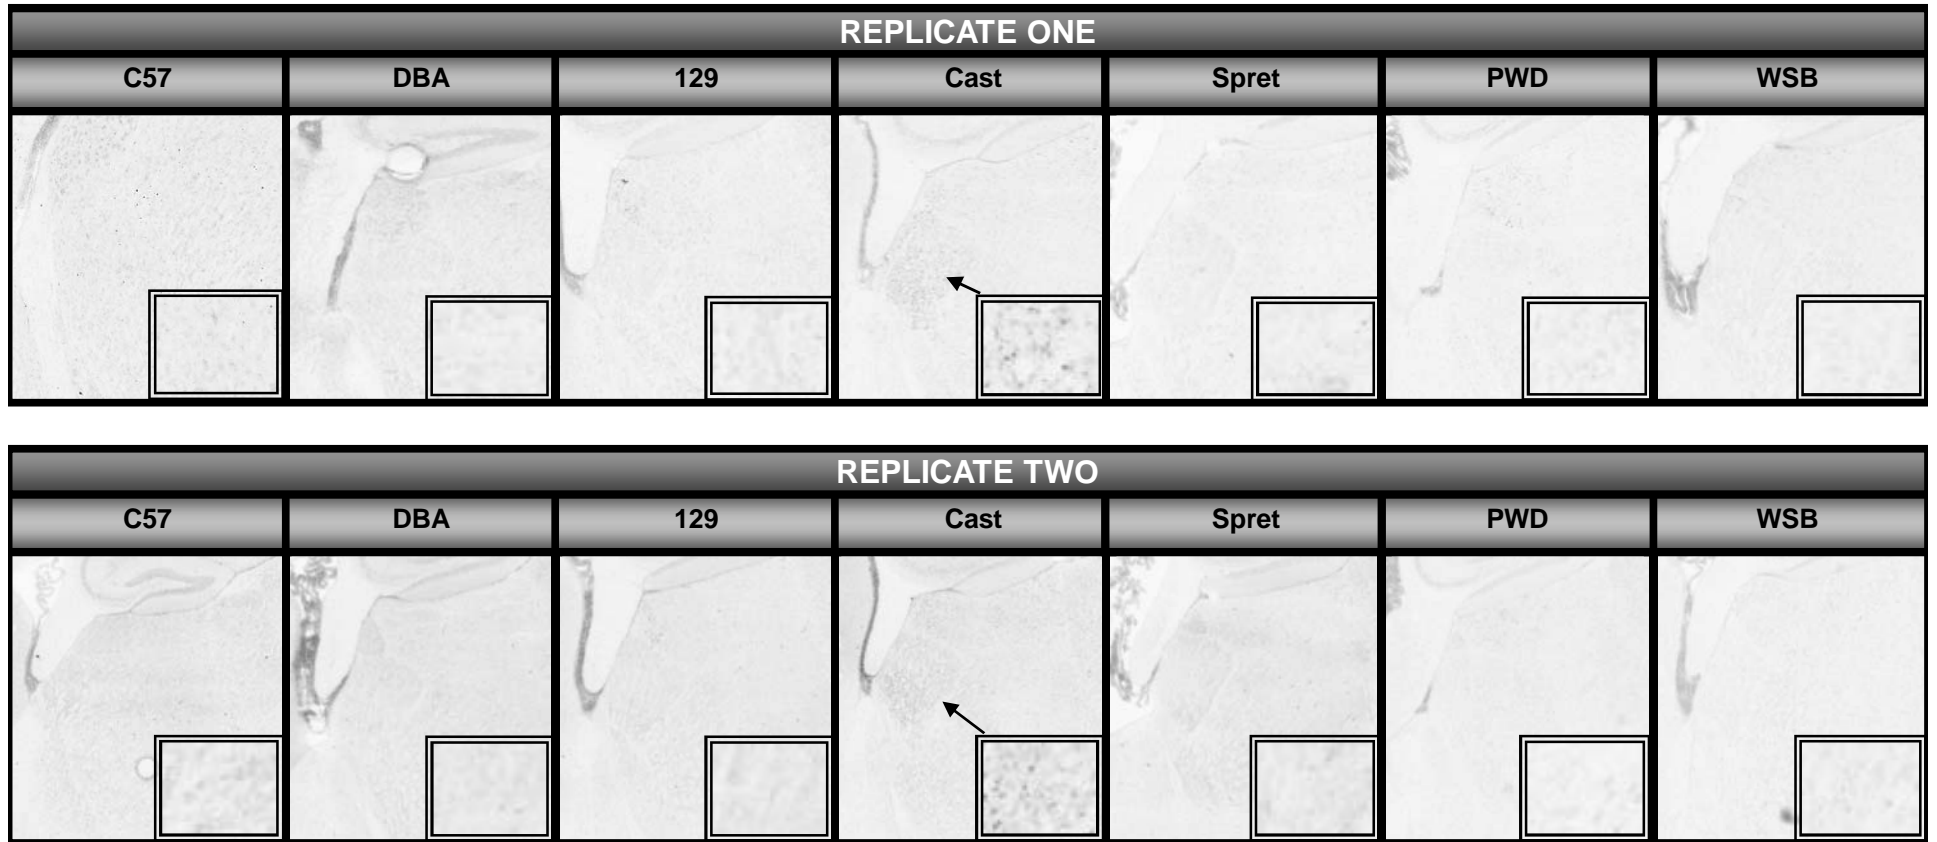

AV: ... < Cast

*The Cast strain shows greater density and intensity of butyrylcholinesterase (Bche) expression in the anteroventral nucleus of thalamus*

**Bche**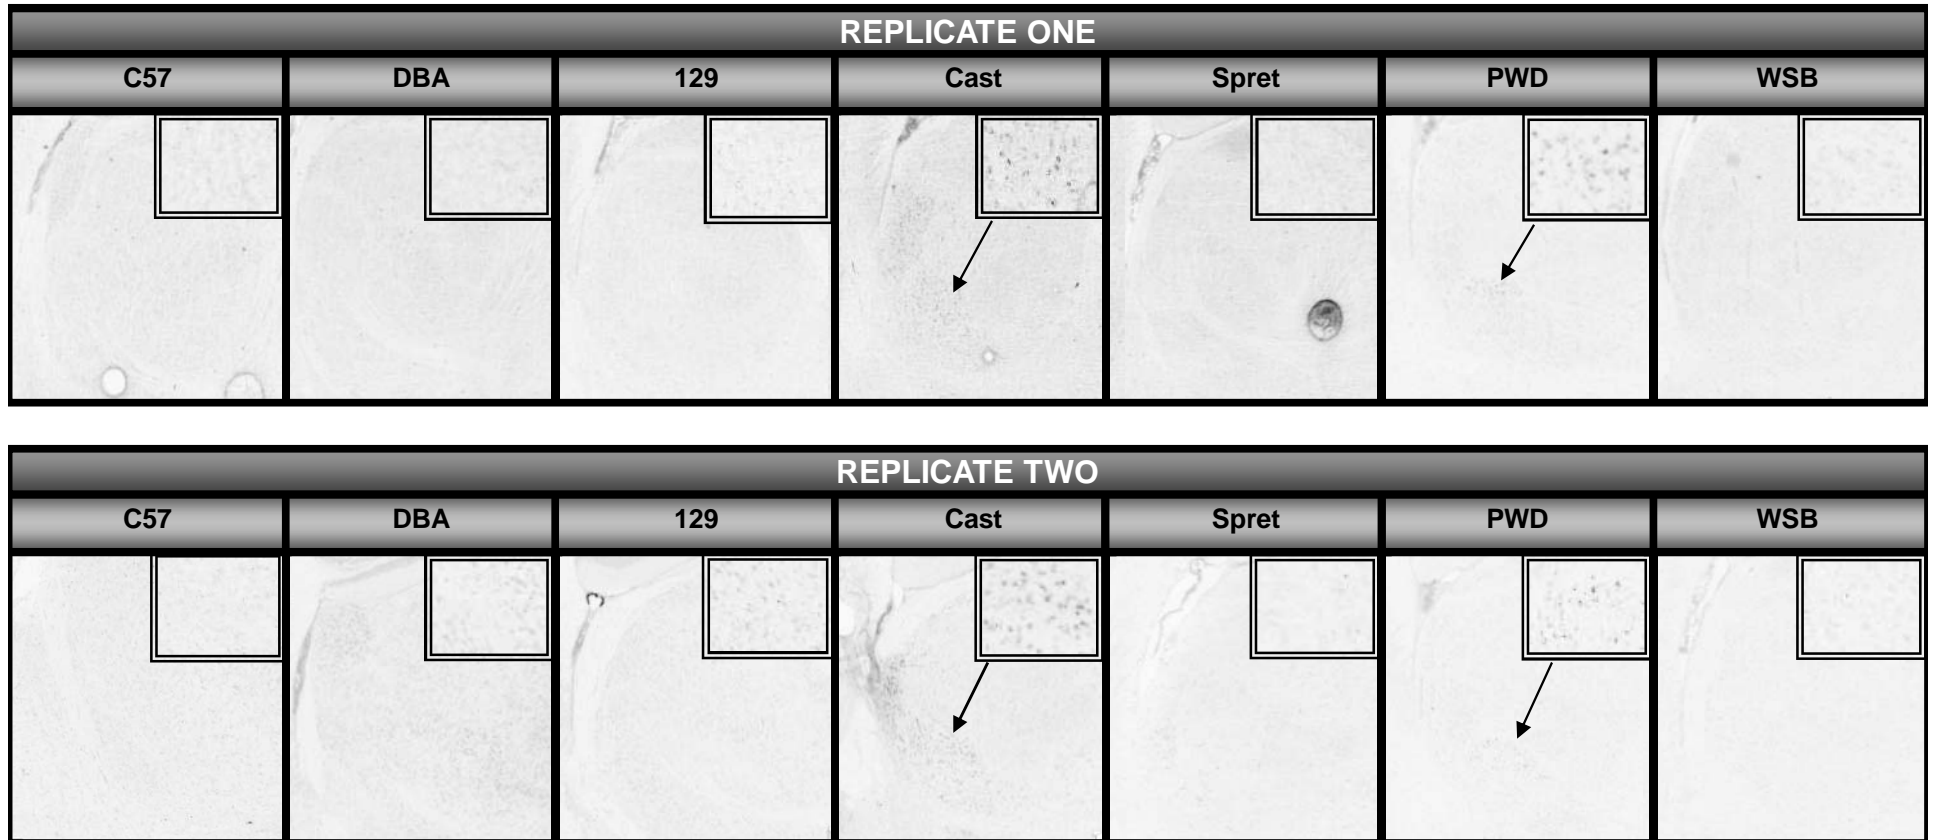

RE: ... < Cast, PWD

*The Cast and PWD strains show greater density and intensity of butyrylcholinesterase (Bche) expression in the nucleus of reurons*

**Bche**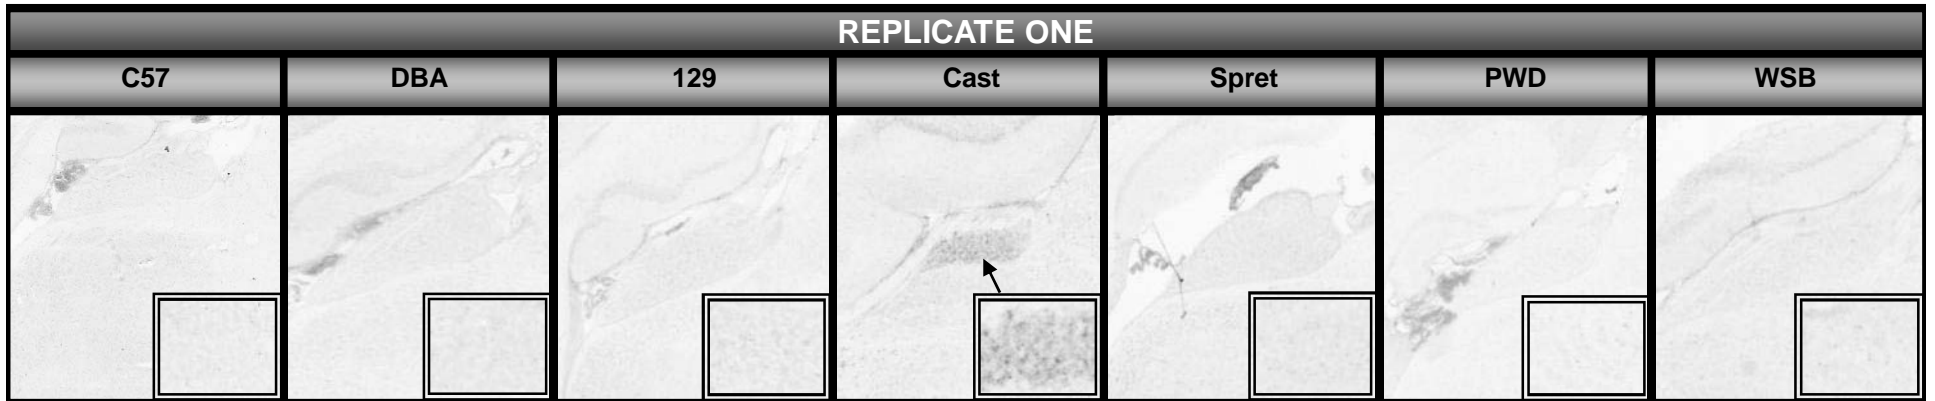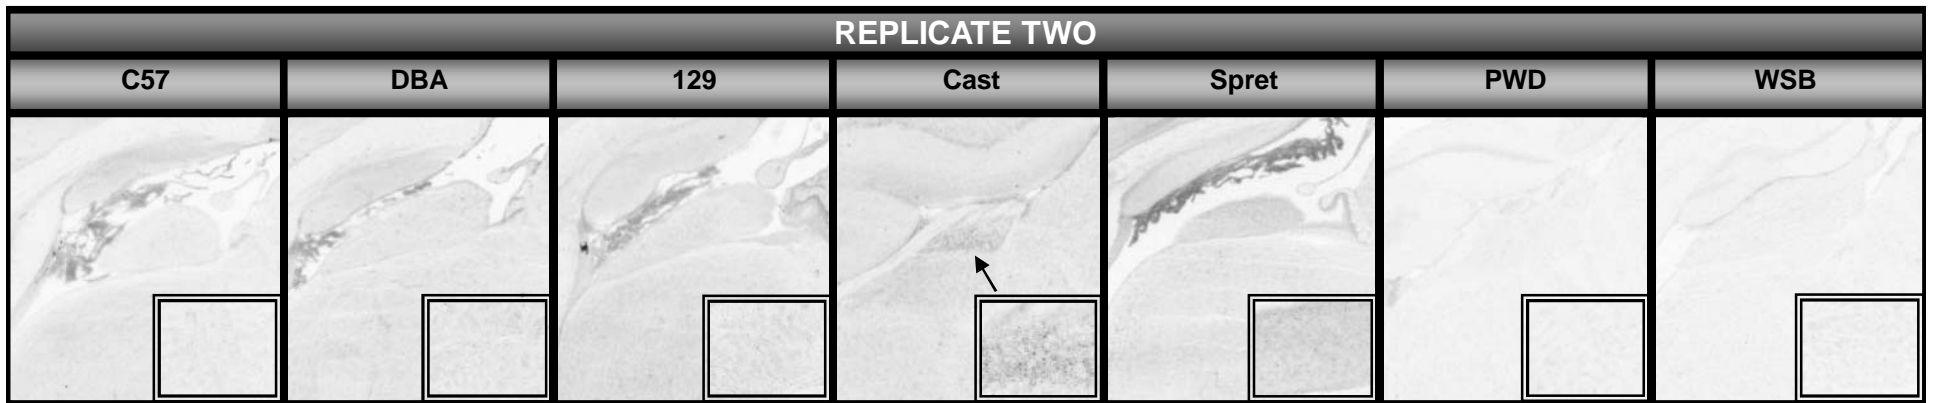

MH: ... < Cast

*The Cast strain shows greater density and intensity of butyrylcholinesterase (Bche) expression in the medial habenula*

**Bche**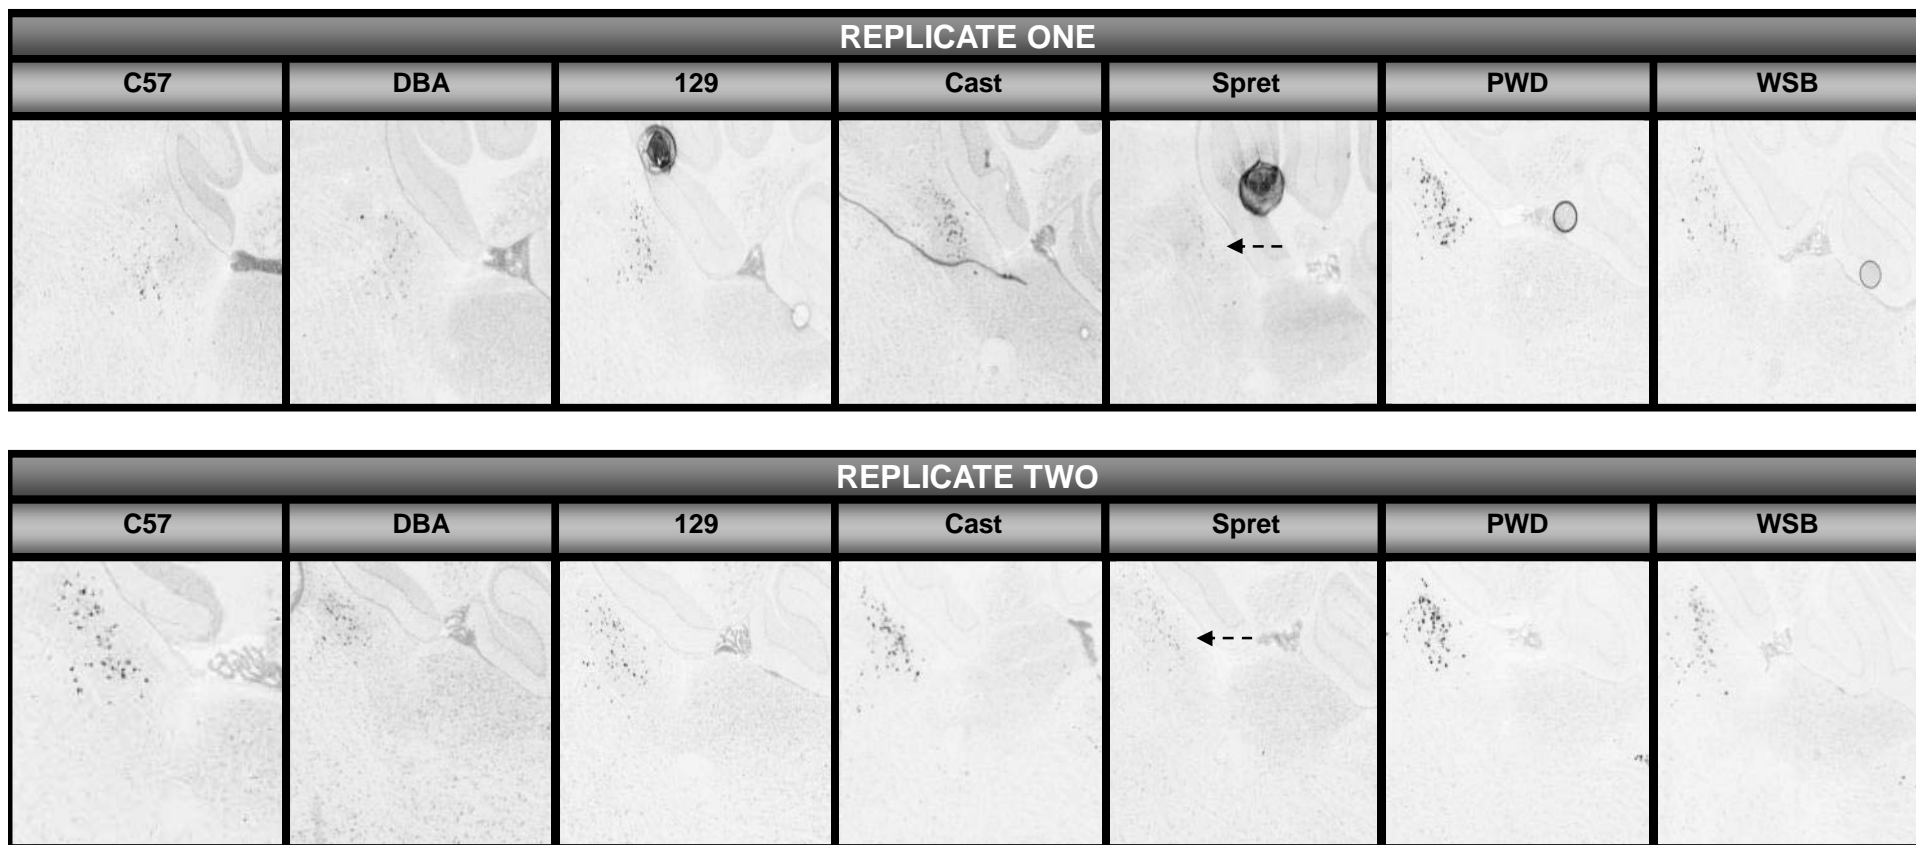

PCG: Spret < ...

*The Spret strain shows lower density and intensity of butyrylcholinesterase (Bche) expression in the pontine central gray*

**Bche**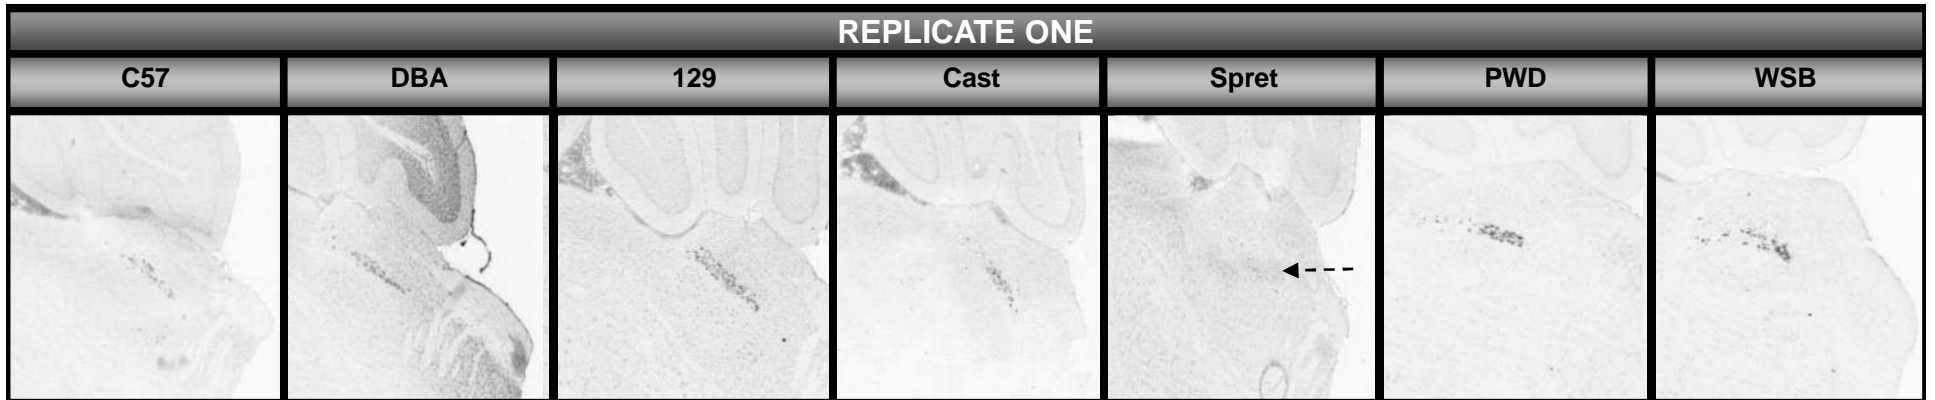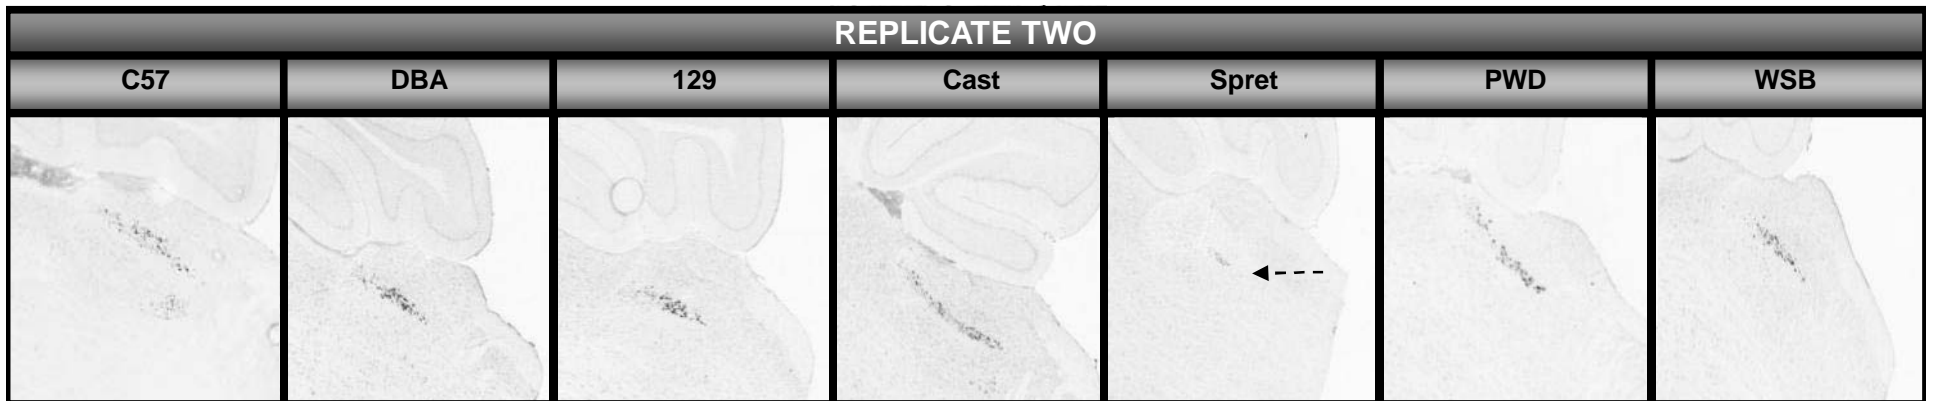

**DMX: Spret < ...**

*The Spret strain shows lower density and intensity of butyrylcholinesterase (Bche) expression in the dorsal motor nucleus of the vagus nerve*

## Cyp19a1

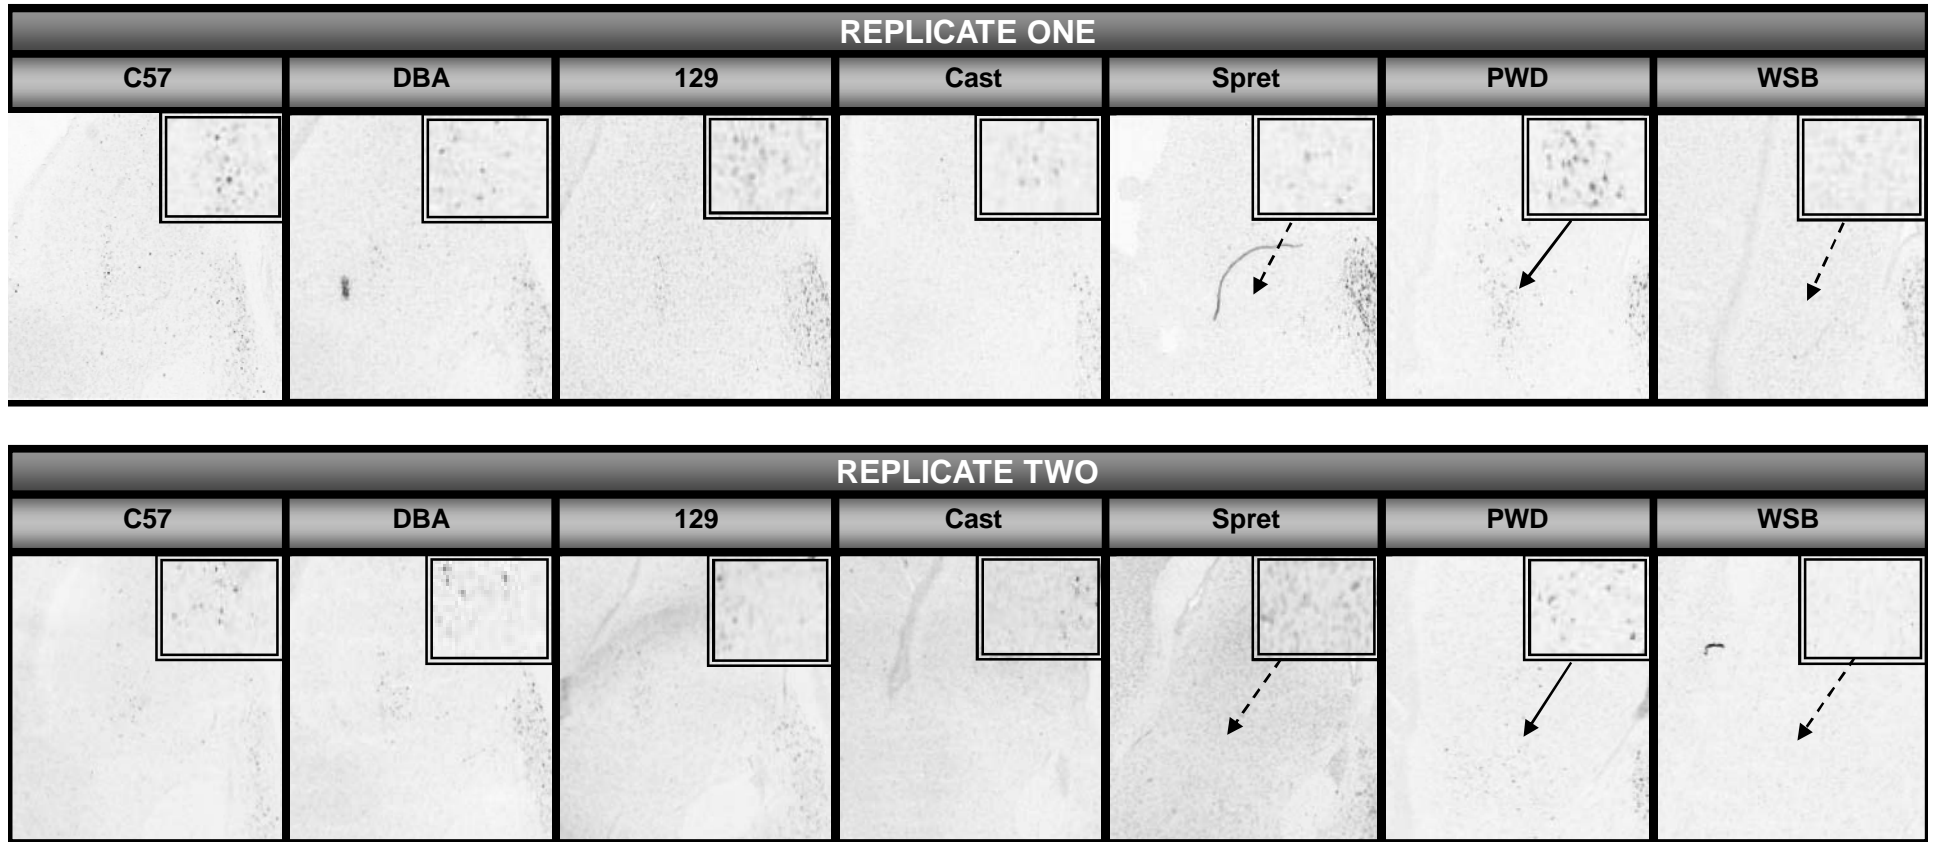

**LS: Spret, WSB < ... < PWD**

*The Spret and WSB strains show lower density and intensity of cytochrome P450, family 19, subfamily a, polypeptide 1 (Cyp19a1) expression in the lateral septal nucleus; the PWD strain shows greater.*



**Drd1a**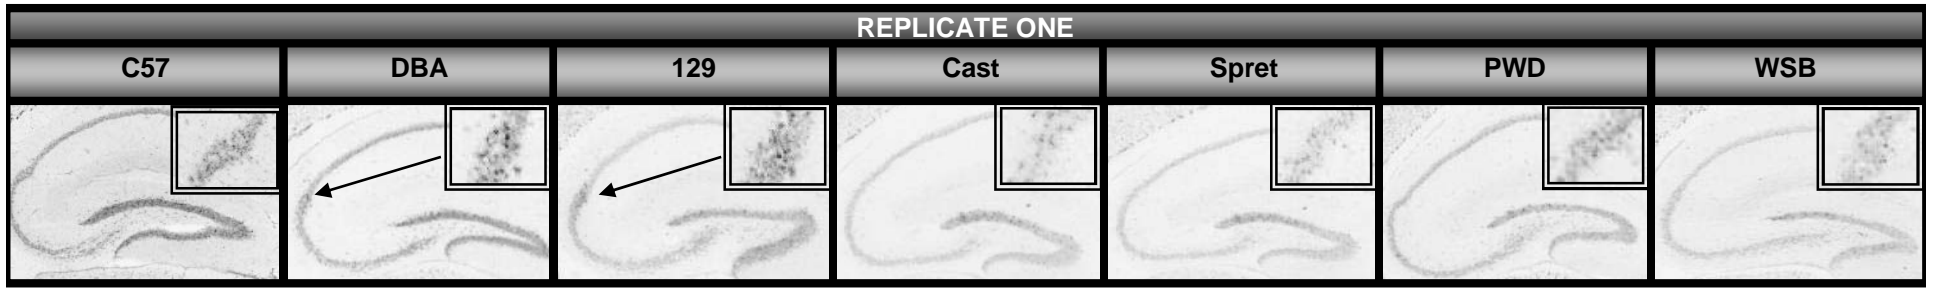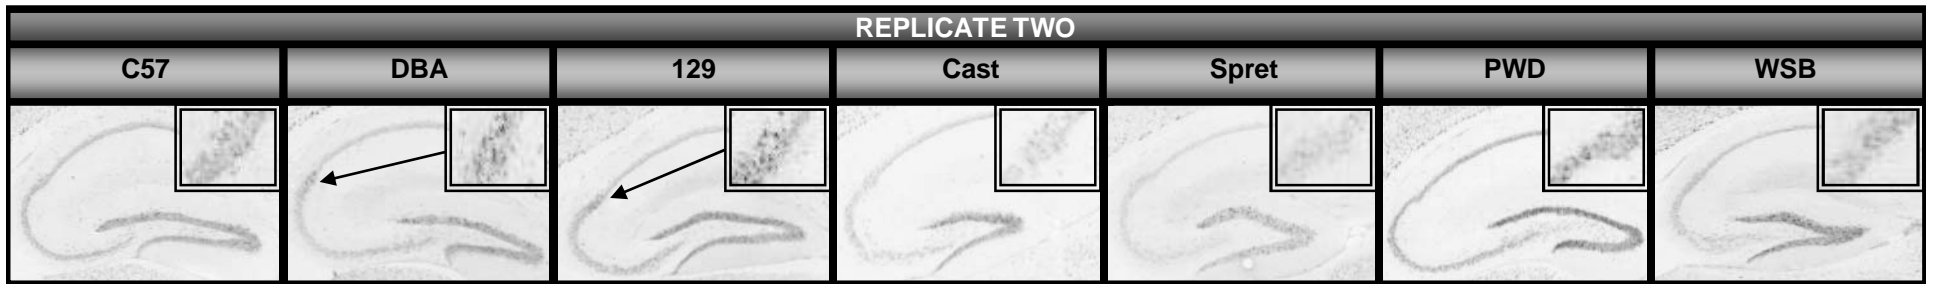

CA2sp: ... < DBA, 129

*The DBA and 129 strains show greater density and intensity of dopamine receptor D1A (Drd1a) expression in the cornu ammonis field 2, pyramidal layer*

**Drd1a**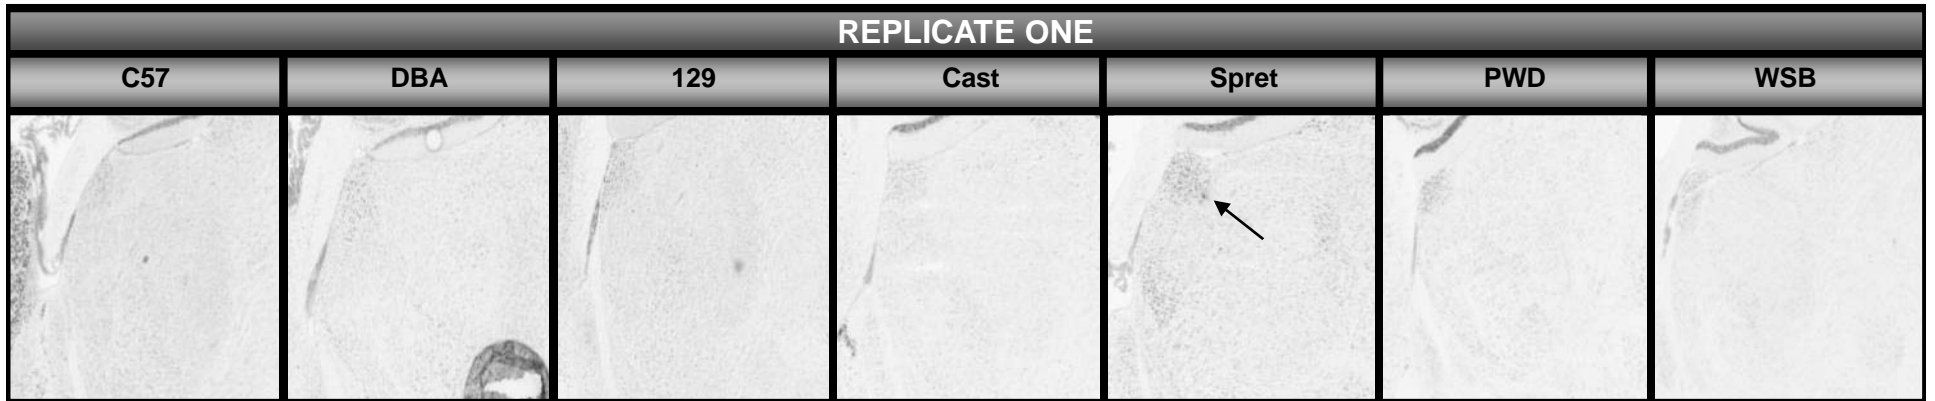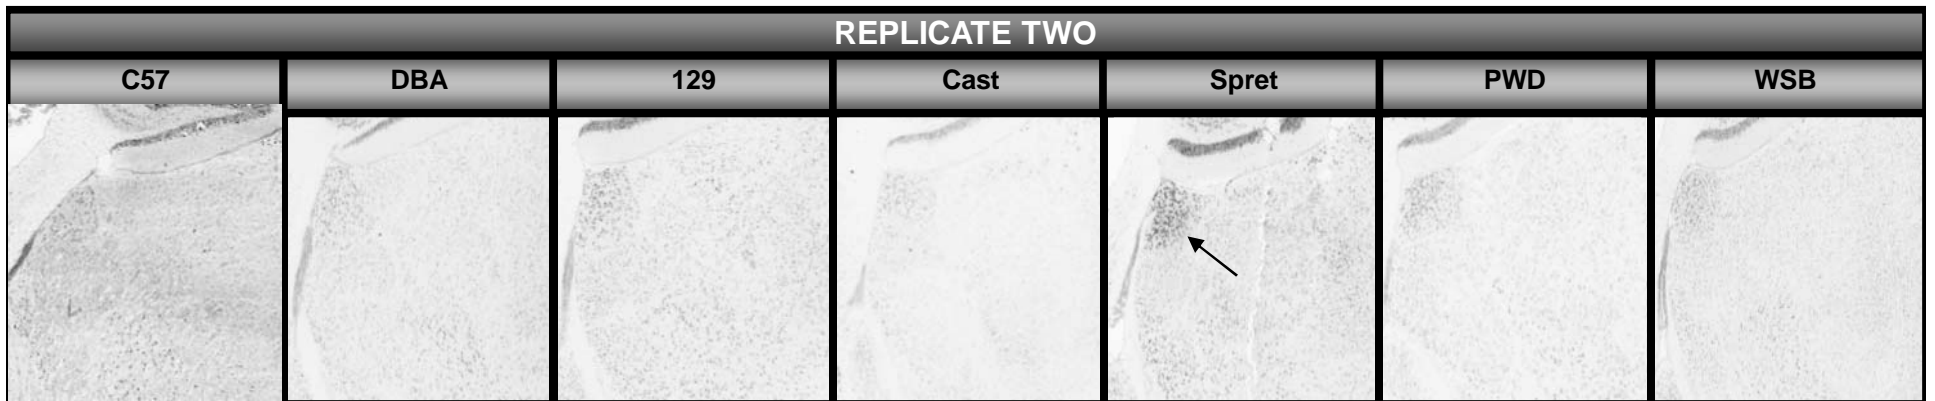

AD: ... < Spret

*The Spret strain shows greater density and intensity of dopamine receptor D1A (Drd1a) expression in the anterodorsal*

**Drd1a**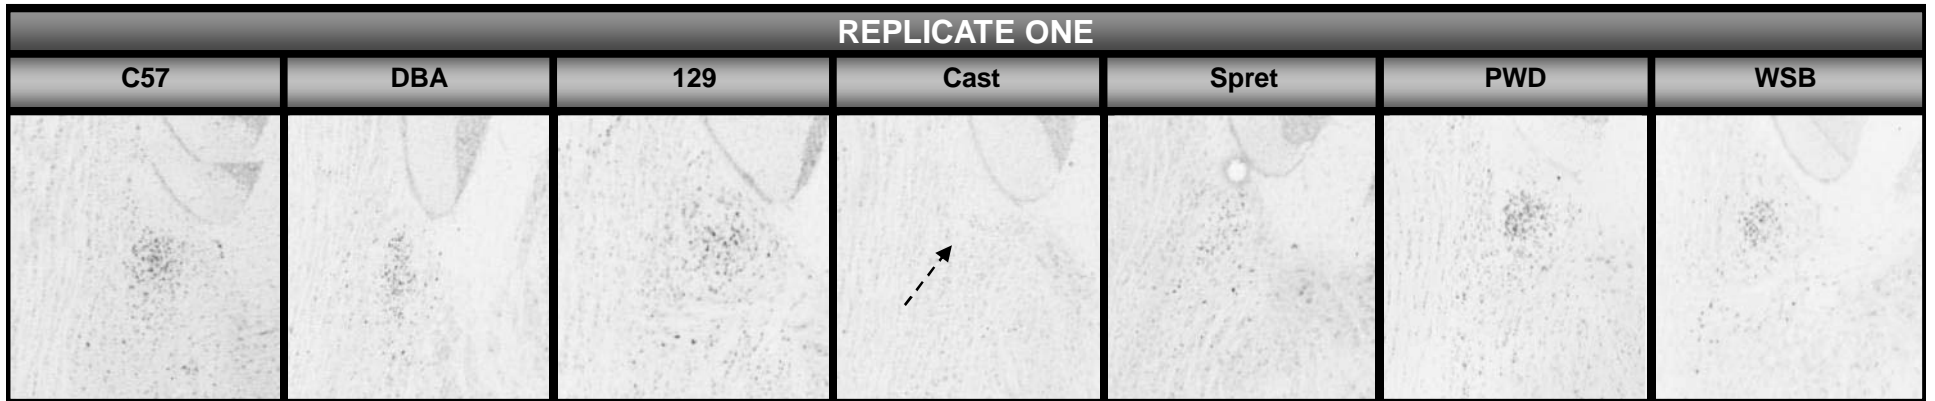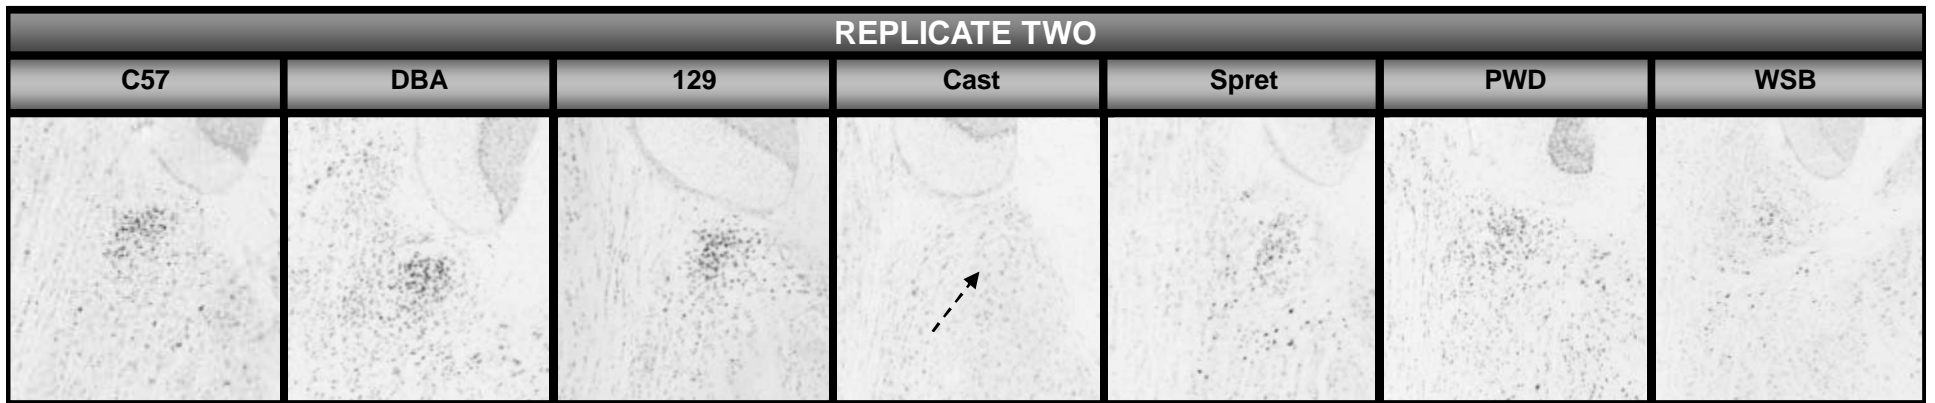

**PB: Cast < ...**

---

*The Cast strain shows lower density and intensity of dopamine receptor D1A (Drd1a) expression in the parabrachial nucleus*

**Drd2**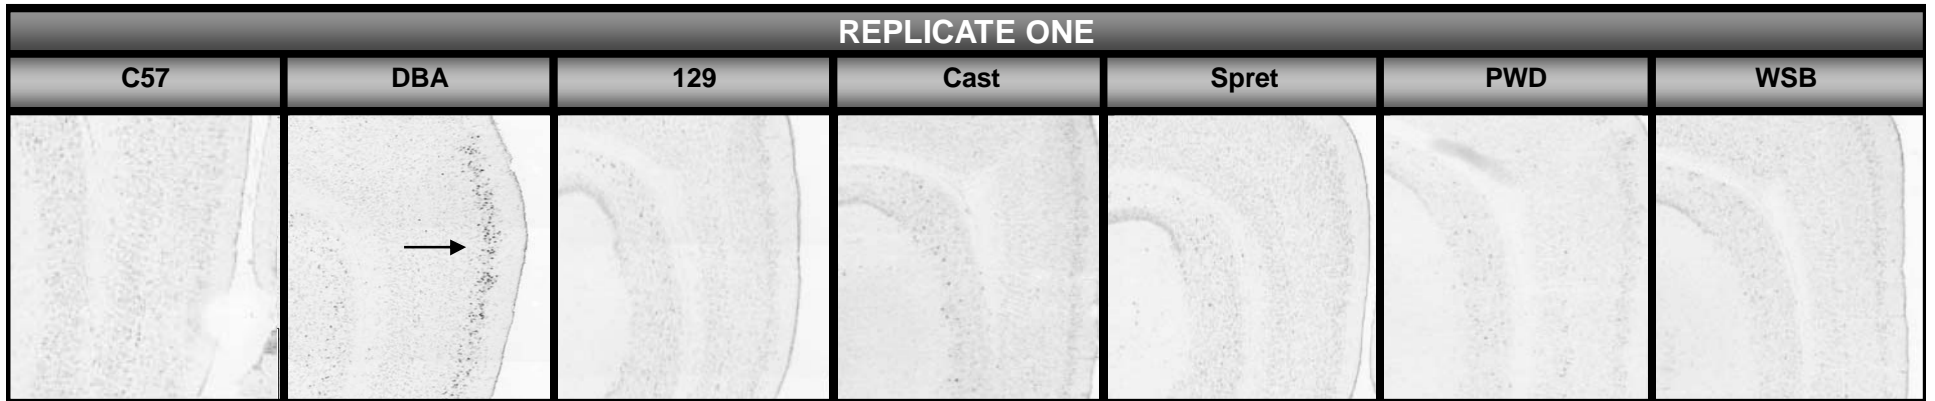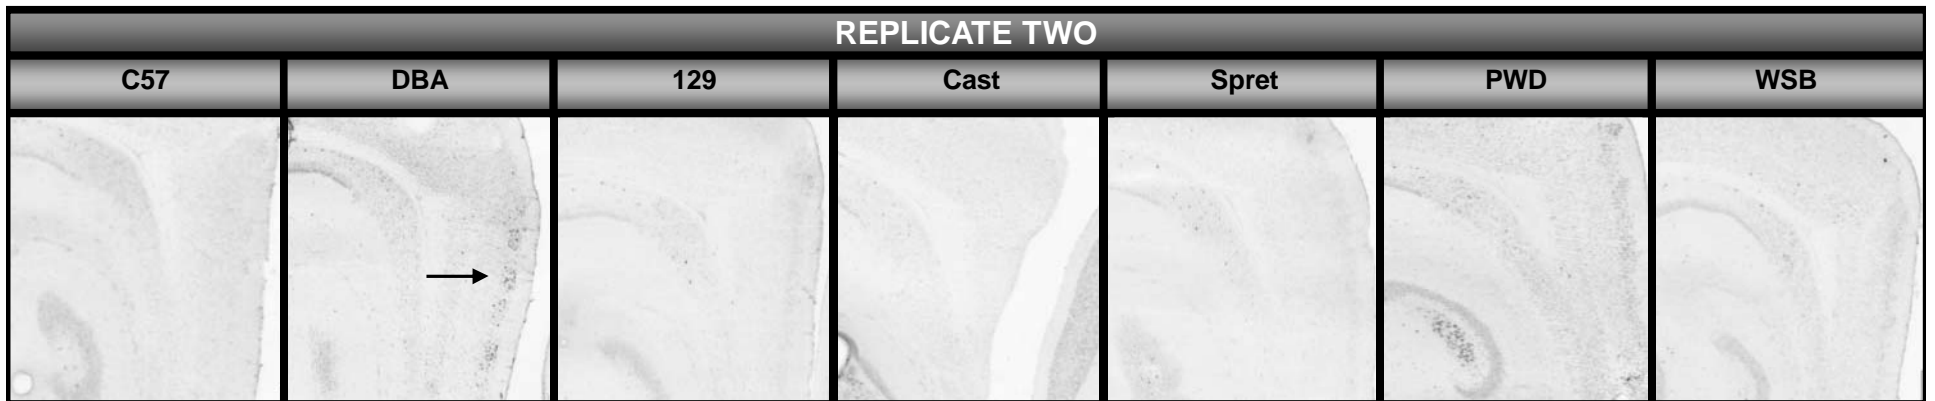**ENTI: ... < DBA**

*The DBA strain shows greater density and intensity of dopamine receptor 2 (Drd2) expression in the entorhinal area, lateral part*

20a,b

## Drd2

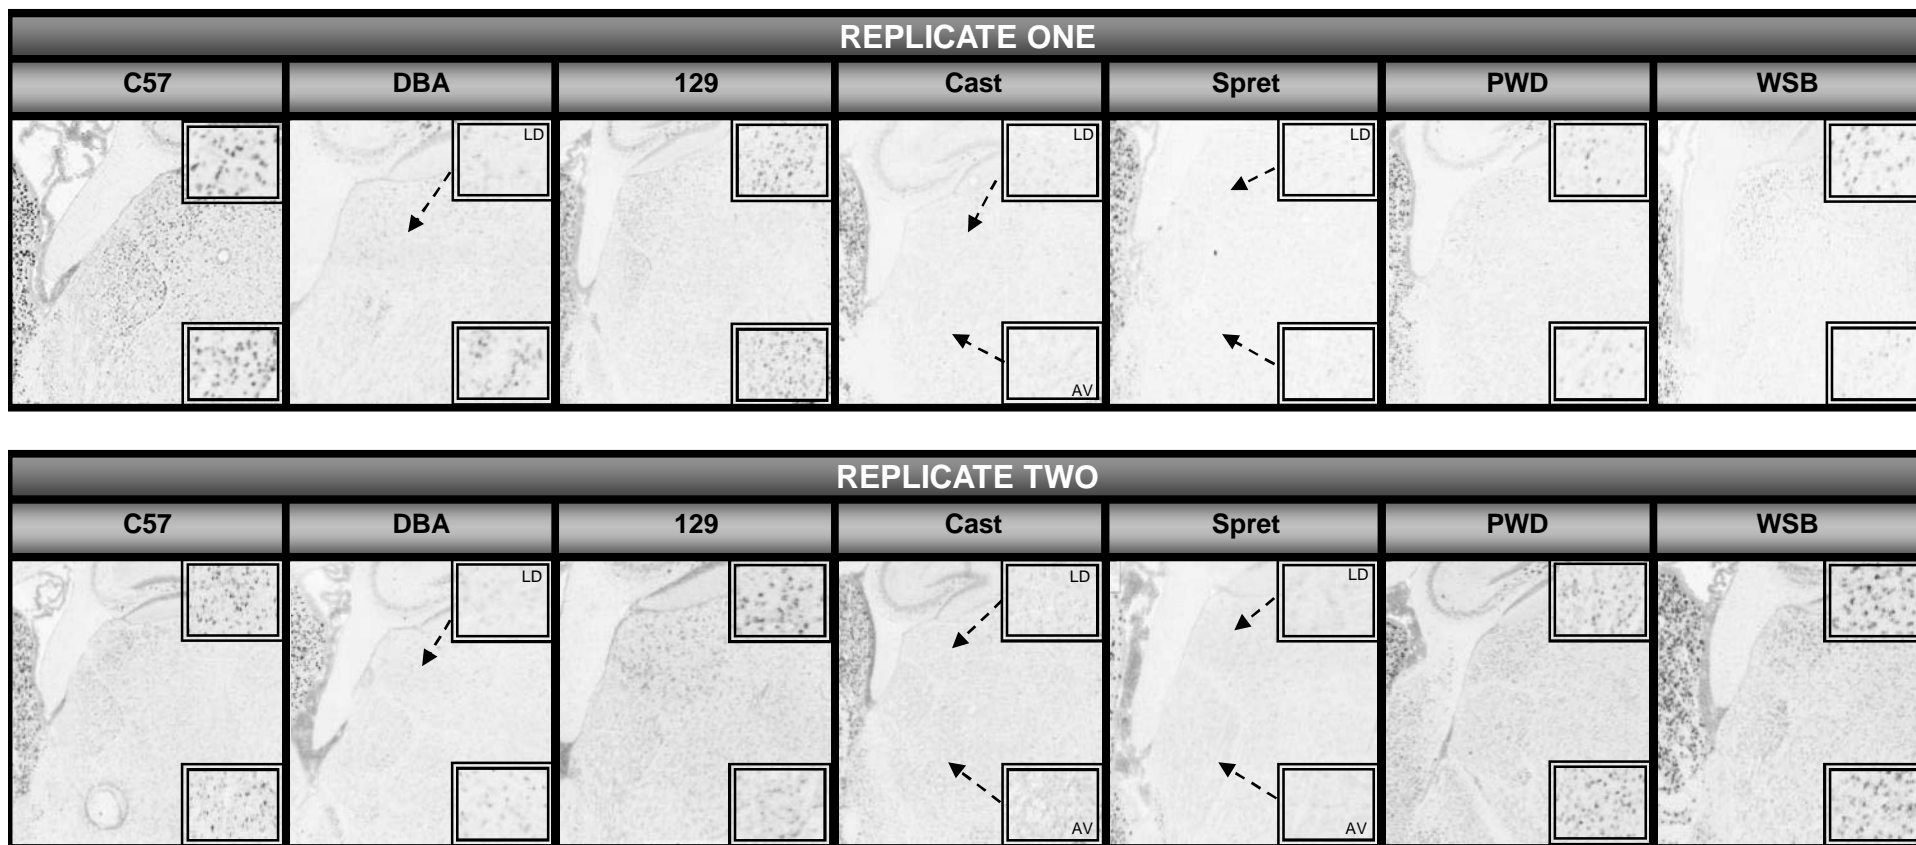

**LD: DBA, Cast, Spret < ...**

**AV: Cast, Spret < ...**

*The DBA, Cast and Spret strains show lower density and intensity of dopamine receptor 2 (Drd2) expression in the lateral dorsal nucleus of thalamus; the Cast and Spret show lower density and intensity of expression in the anteroventral nucleus of thalamus*

**Egfr**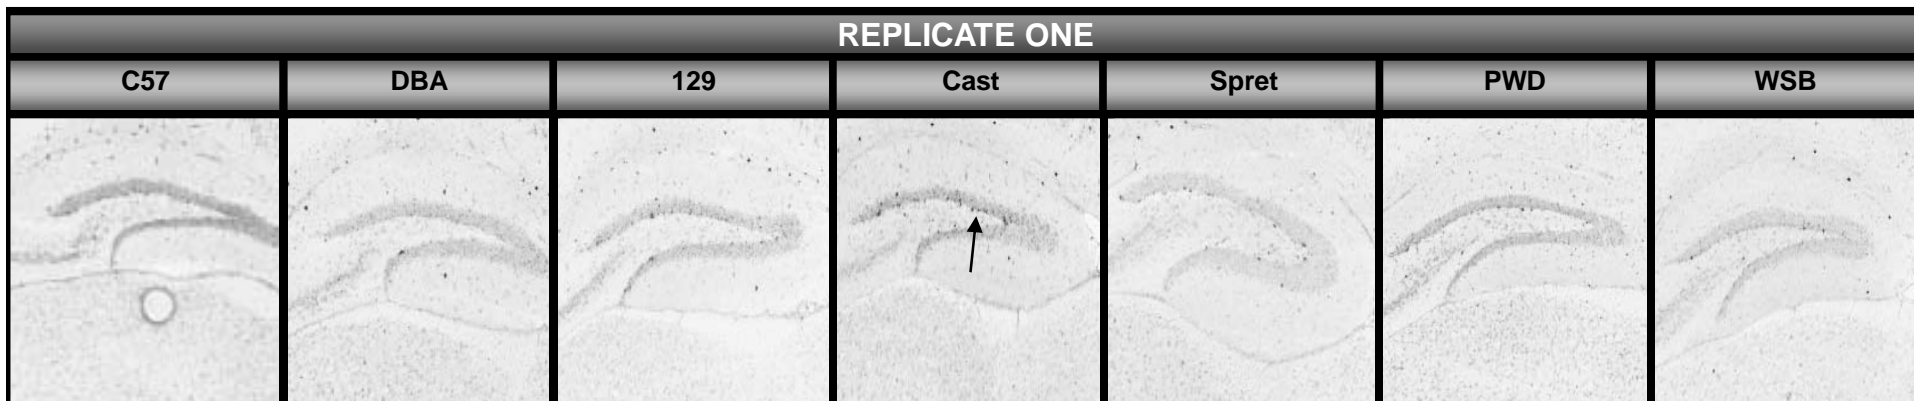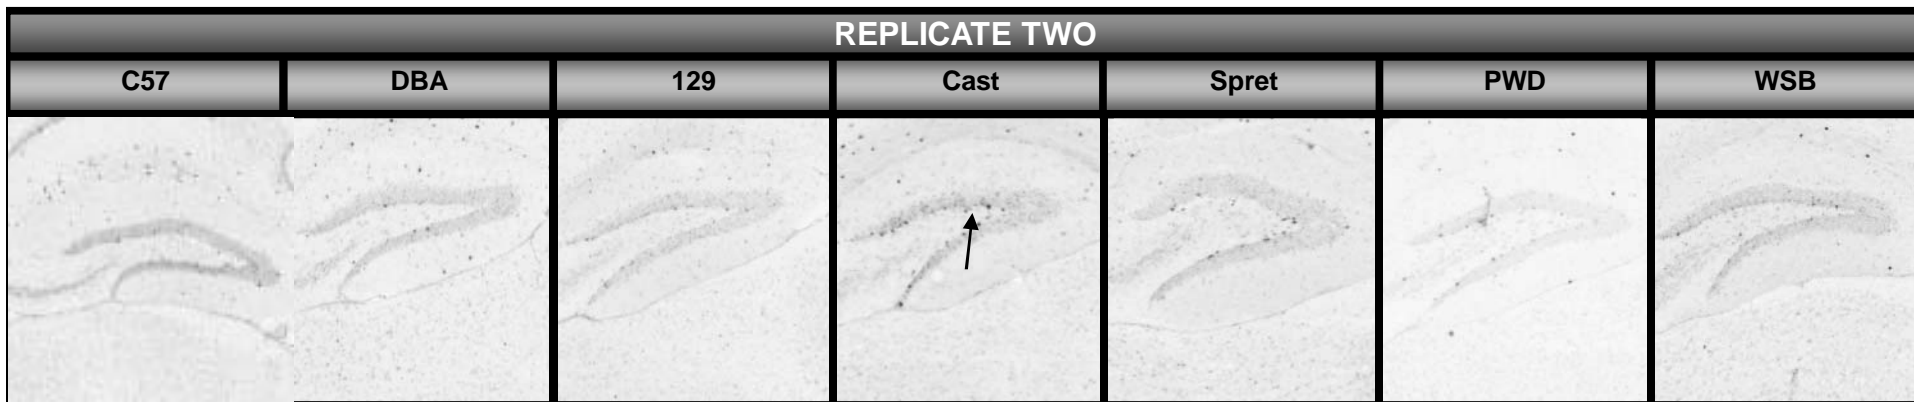

**DG(sg): ... < Cast**

---

*The Cast strain shows greater density and intensity of epidermal growth factor receptor (Egfr) expression in the dentate gyrus, subgranular zone*

**Egfr**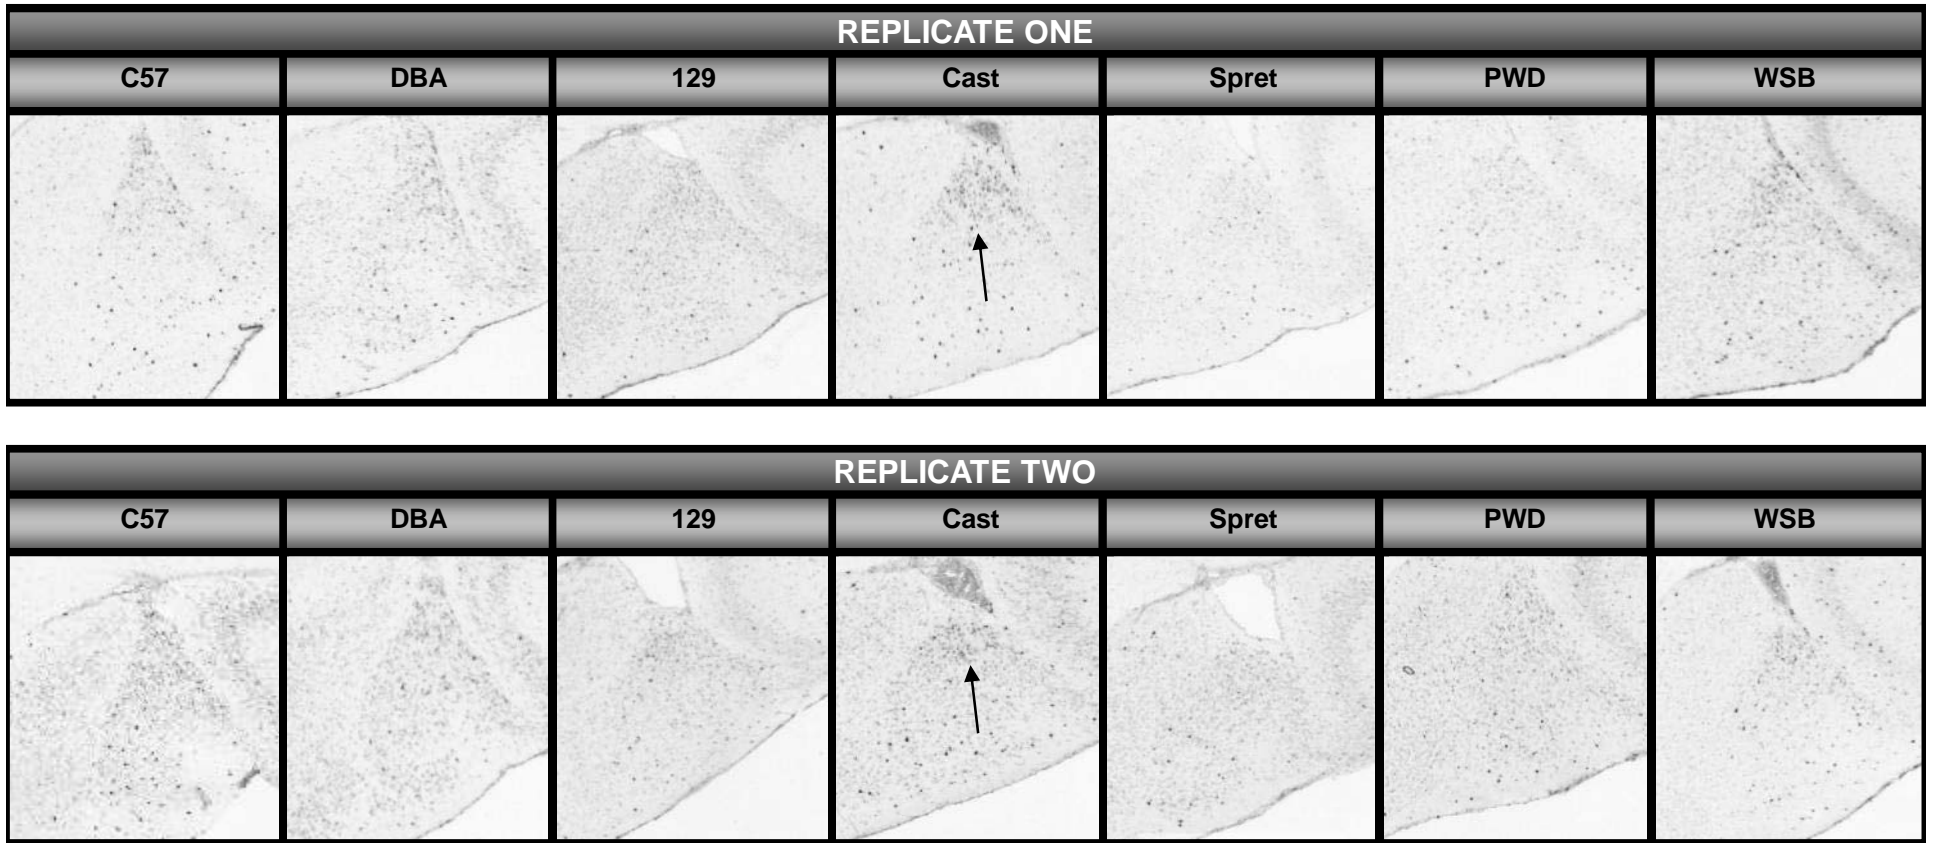

PA: ... < Cast

*The Cast strain shows greater density and intensity of epidermal growth factor receptor (Egfr) expression in the posterior amygdalar nucleus*

**Egfr**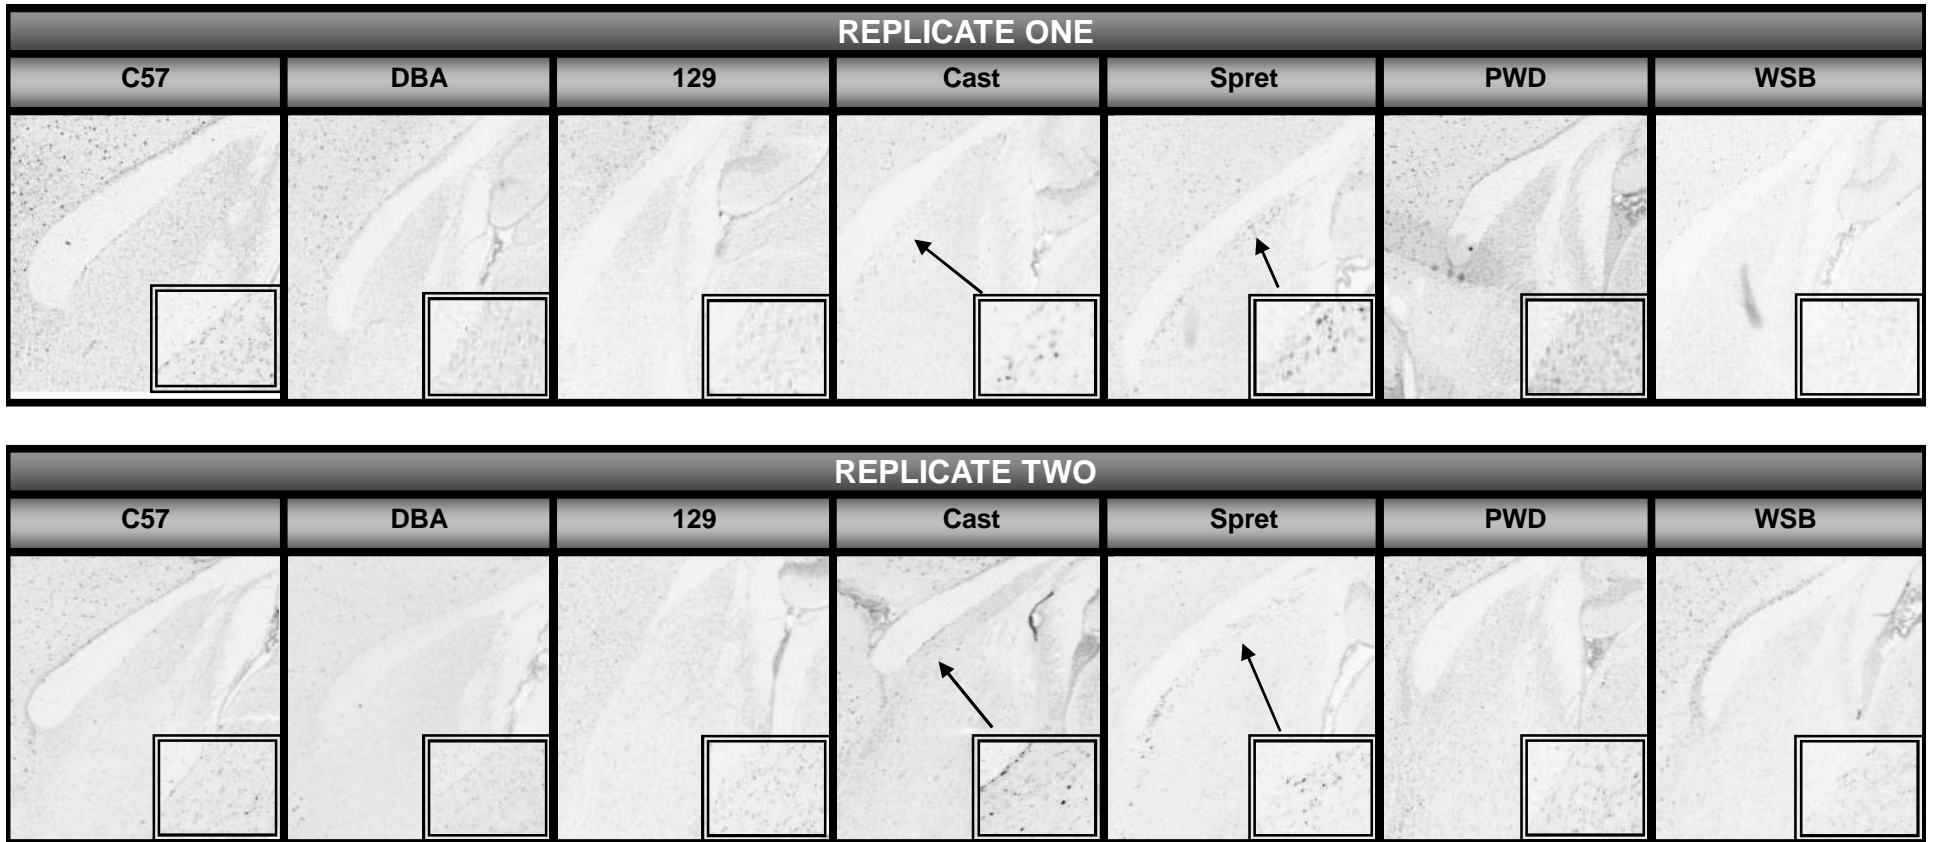

**LSc: ... < Cast, Spret**

---

*The Cast and Spret strains show greater density and intensity of epidermal growth factor receptor (Egfr) expression in the lateral septal nucleus, caudal part*



## Egfr

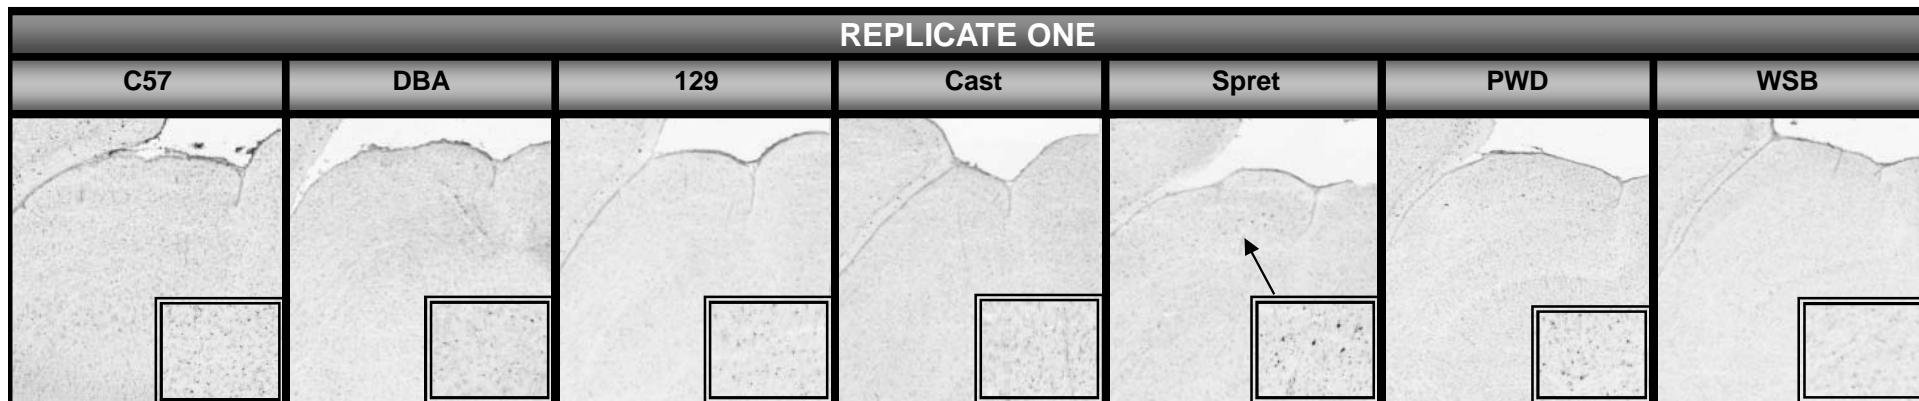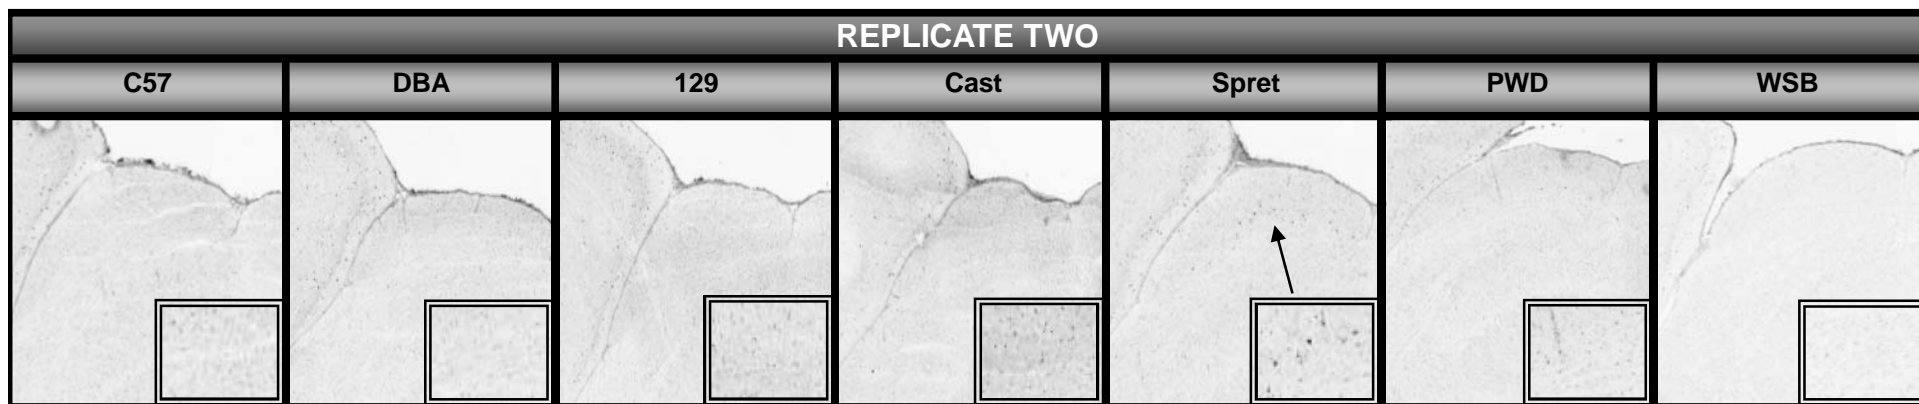

SCs: ... < Spret

*The Spret strain shows greater density and intensity of epidermal growth factor receptor (Egfr) expression in the superior colliculus, sensory part*

**Esr1**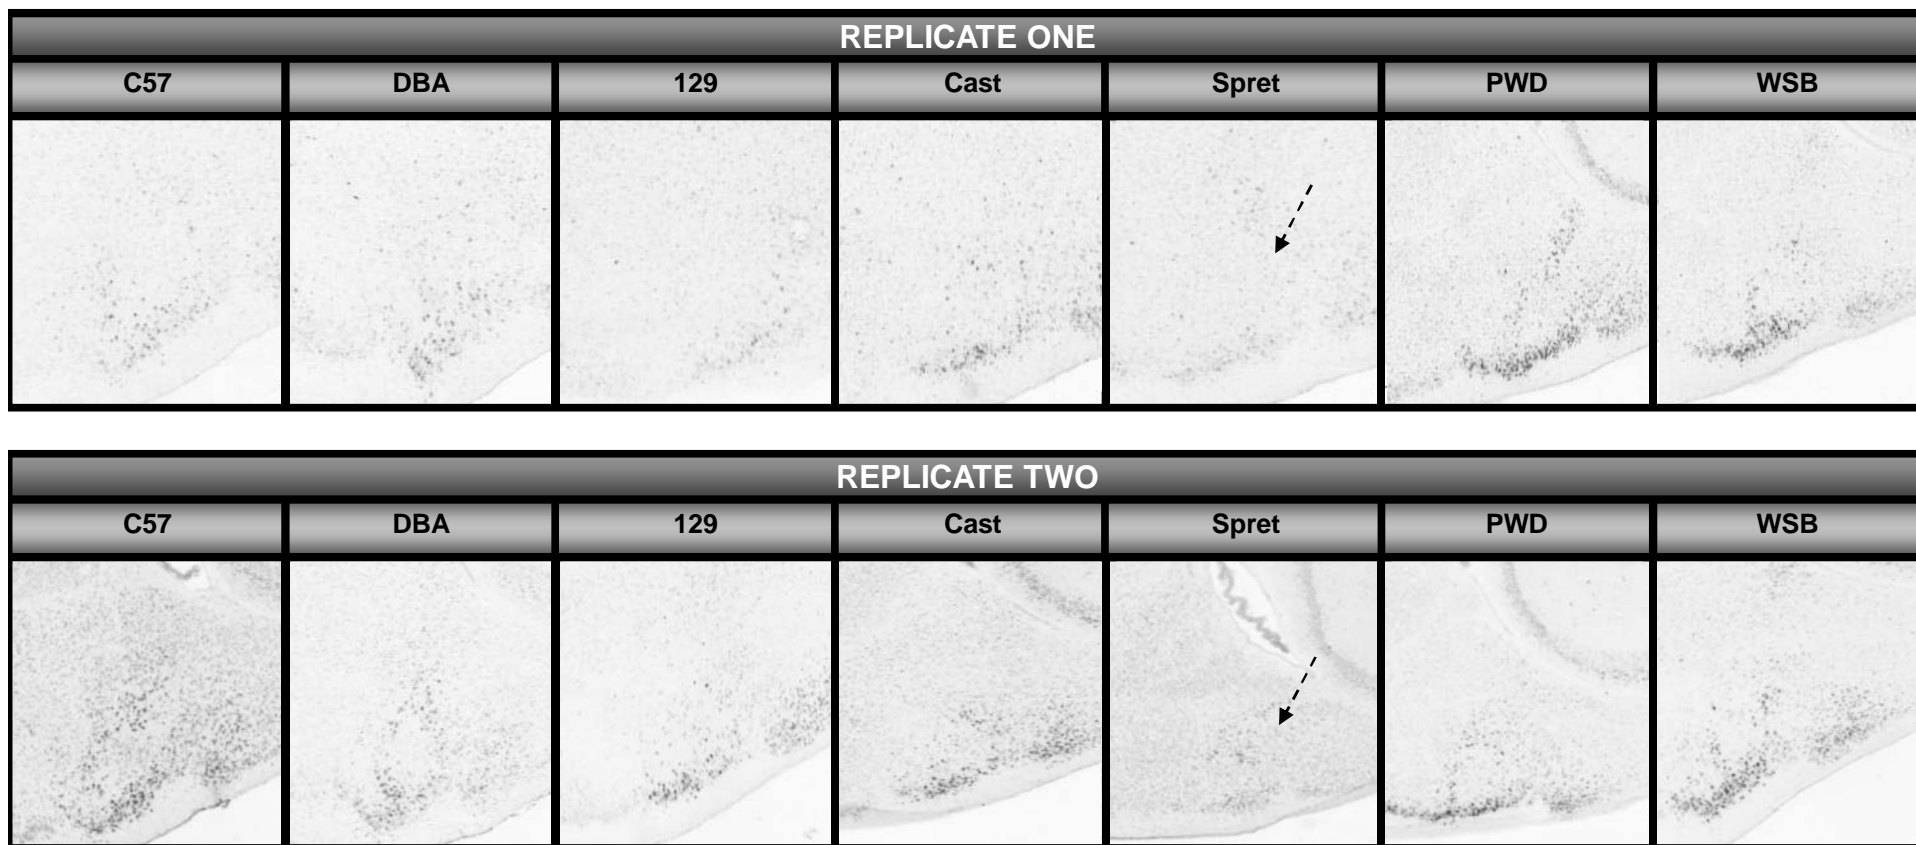

**COAp: Spret < ...**

---

*The Spret strain shows lower density of estrogen receptor alpha (Esr1) expression in the cortical amygdalar area, posterior part*

26a,b

## Esr1

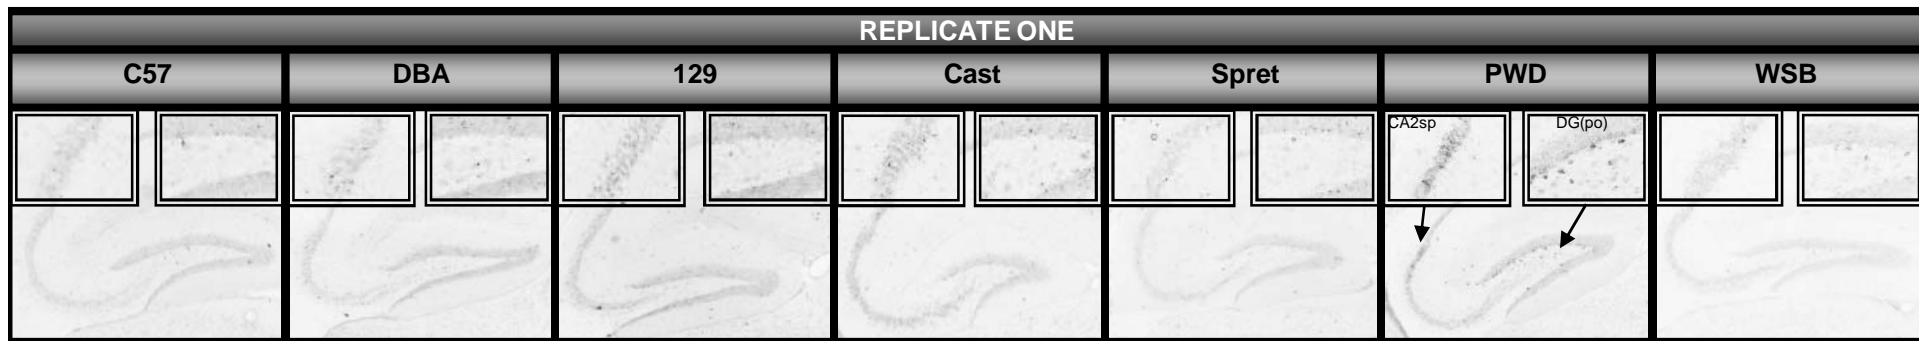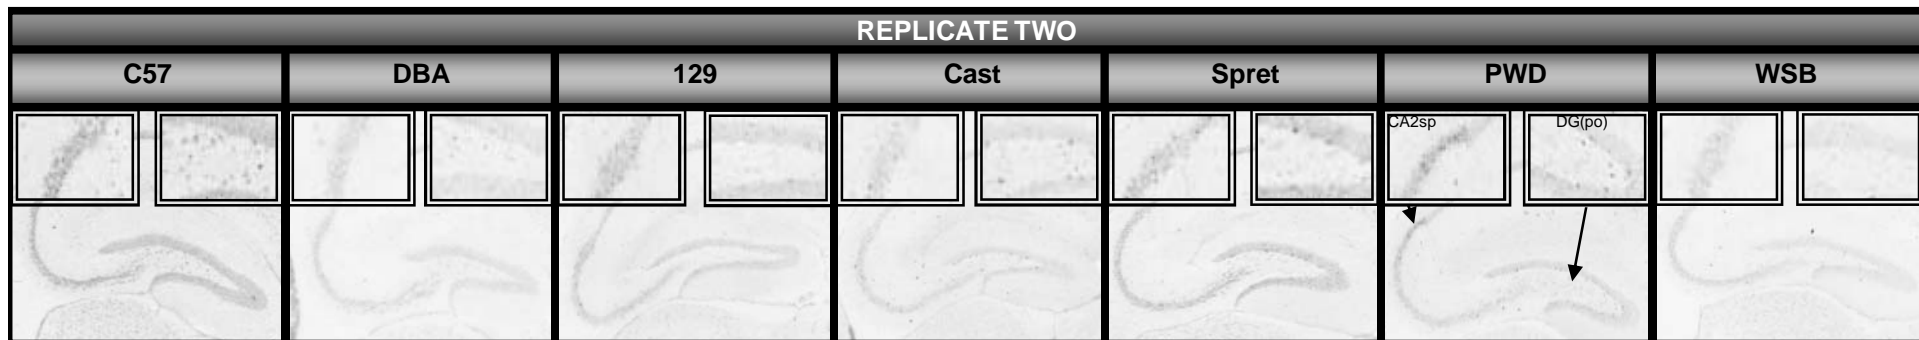

**CA2sp, DG(po): ... < PWD**

*The PWD strain shows greater density and intensity of estrogen receptor alpha (Esr1) expression in the cornu ammonis field 2, pyramidal layer and dentate gyrus, polymorph layer*

**Esr1**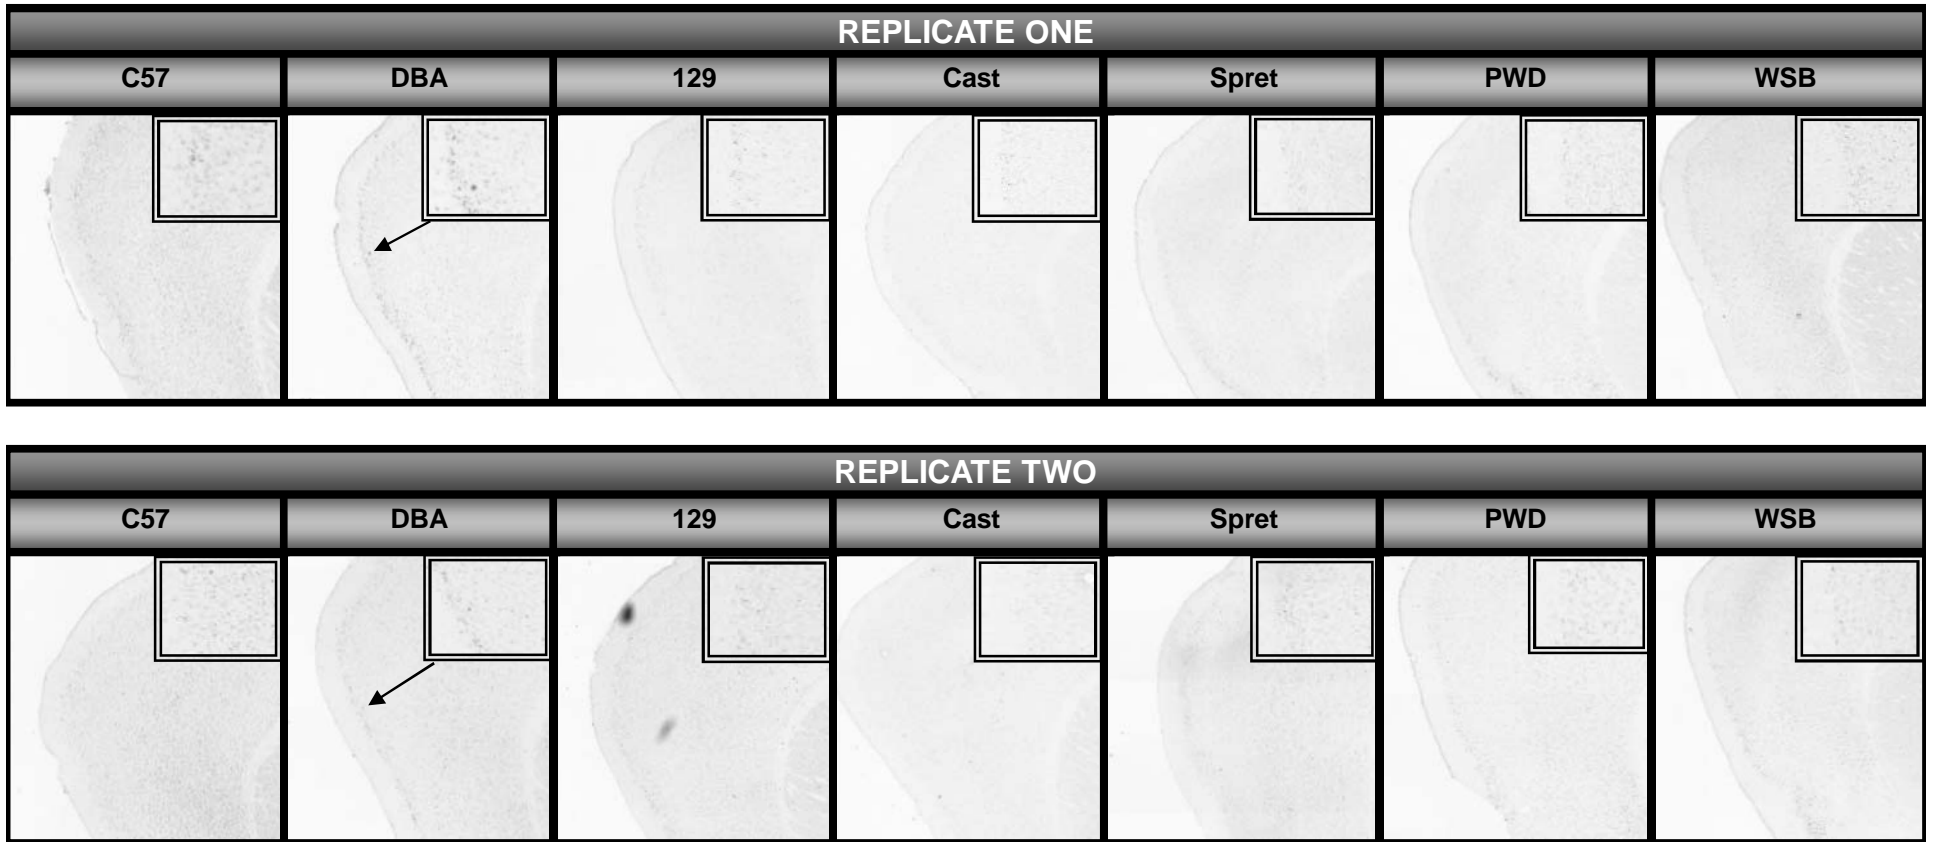

**MO(2/3): ... < DBA**

---

*The DBA strain shows greater density and intensity of estrogen receptor alpha (Esr1) expression in the superficial portion of layer 2/3 of the motor cortex*

**Esr1**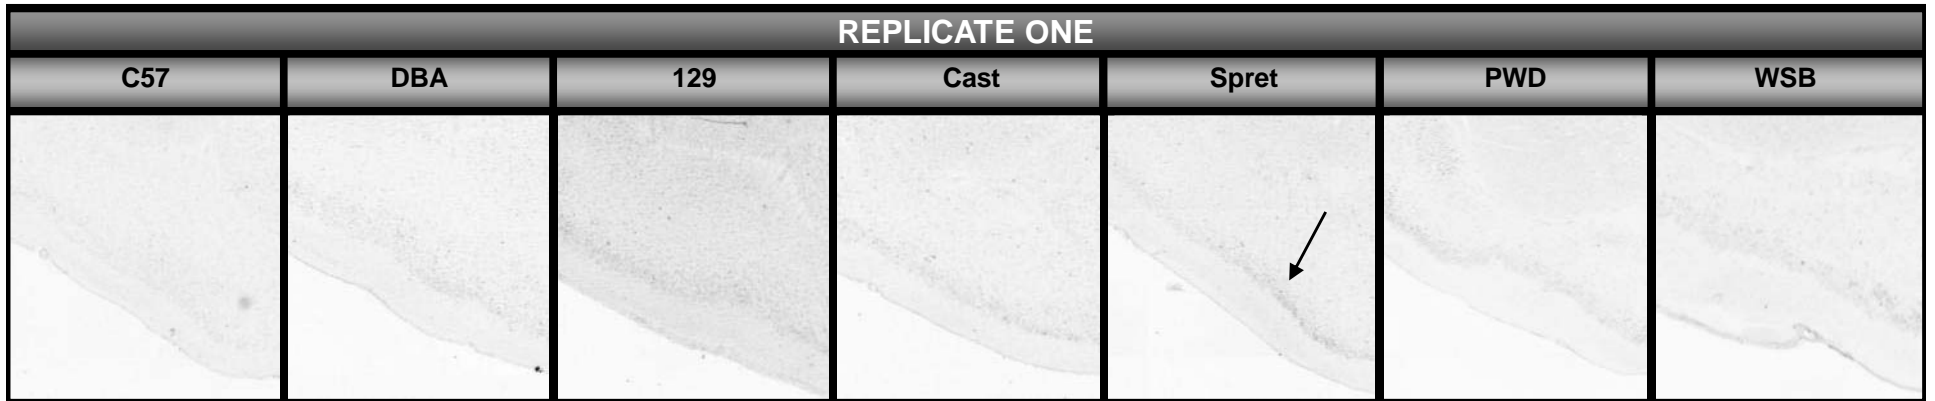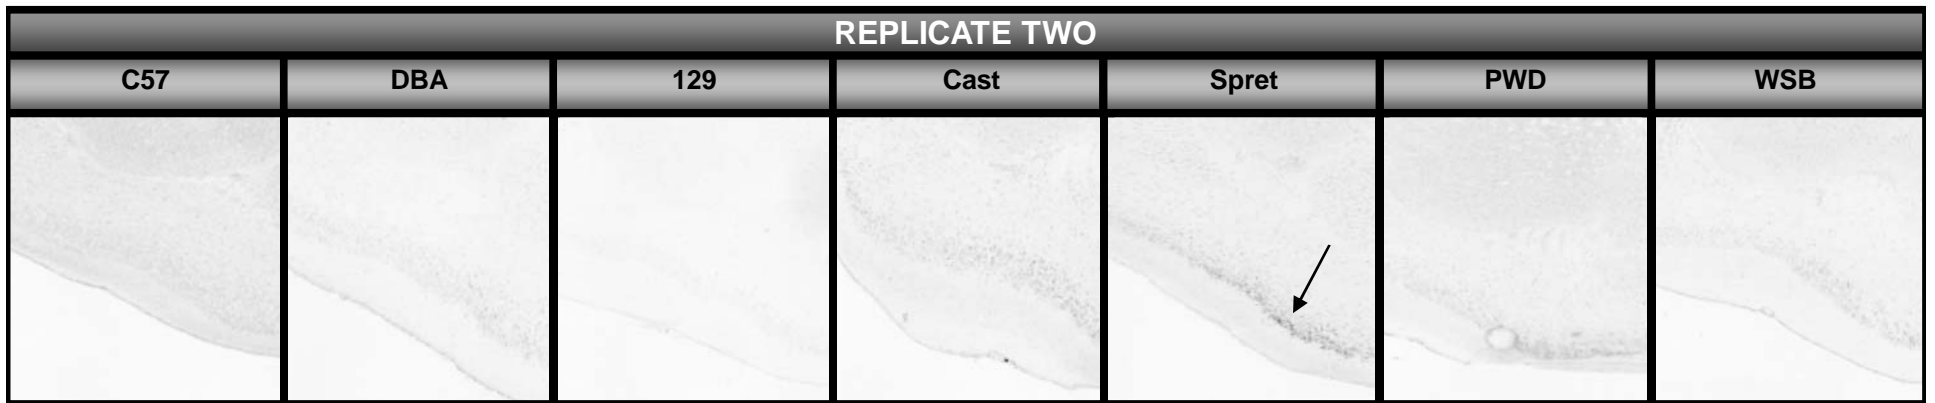

**PIR(2): ... < Spret**

---

*The Spret strain shows greater density and intensity of estrogen receptor alpha (Esr1) expression in the piriform area, pyramidal layer*

**Esr1**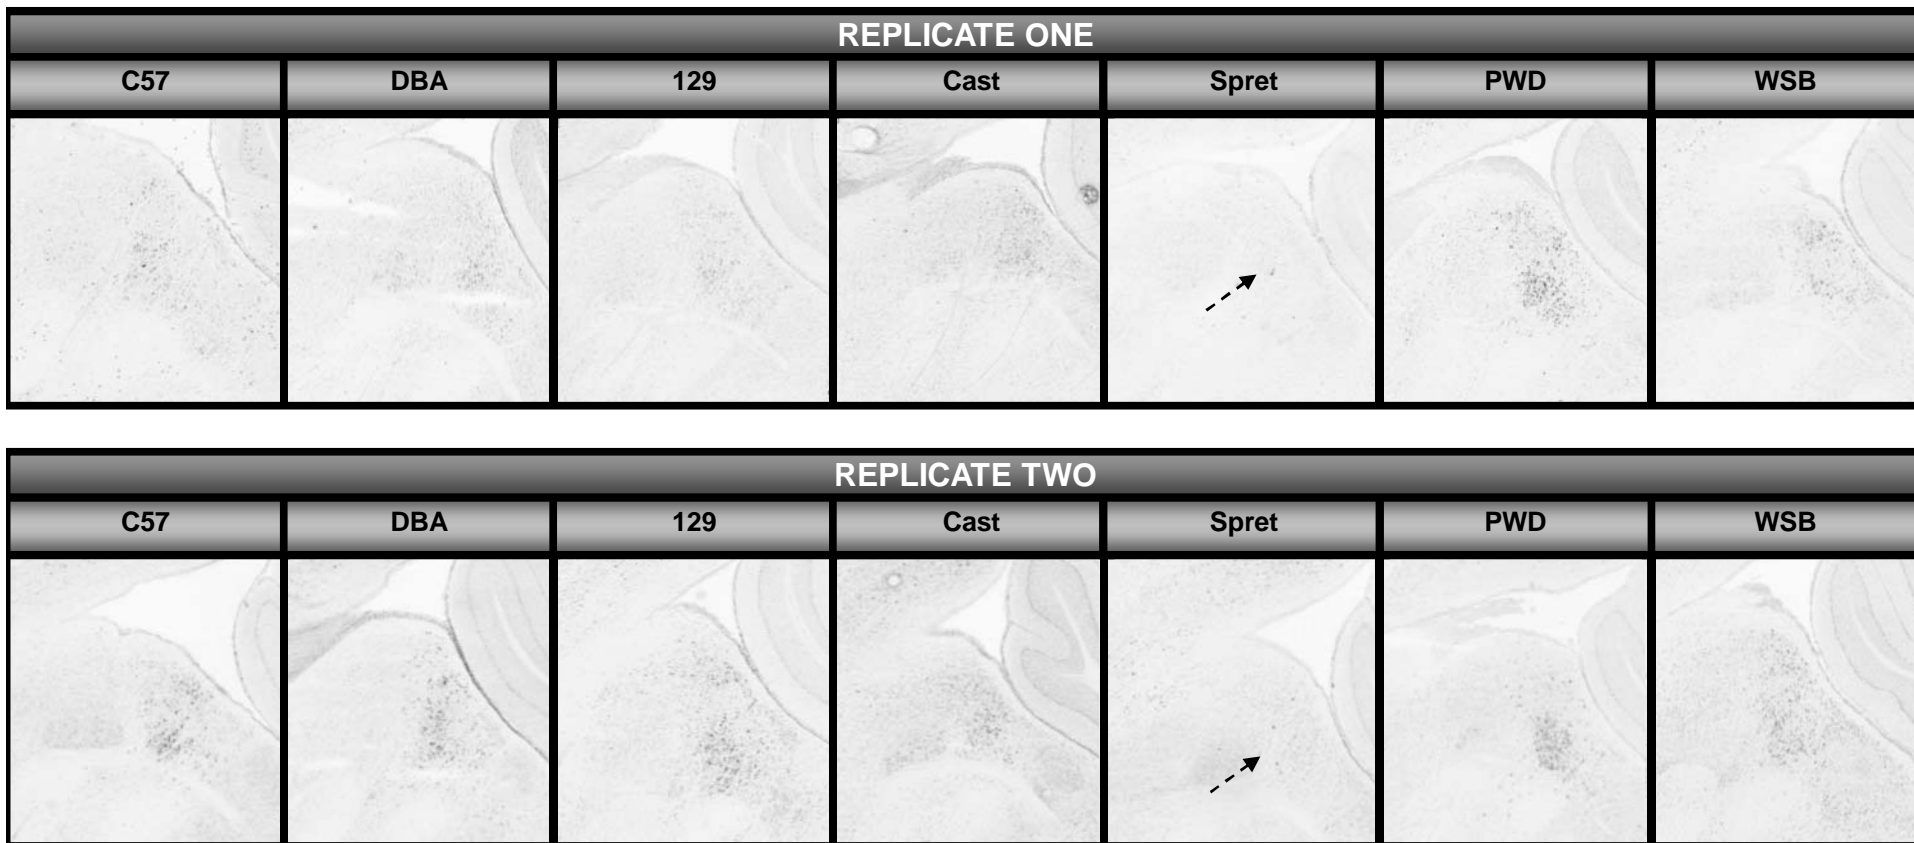

DR: Spret < ...

---

*The Spret strain shows lower density and intensity of estrogen receptor alpha (Esr1) expression in the dorsal nucleus raphé*

**Esr1**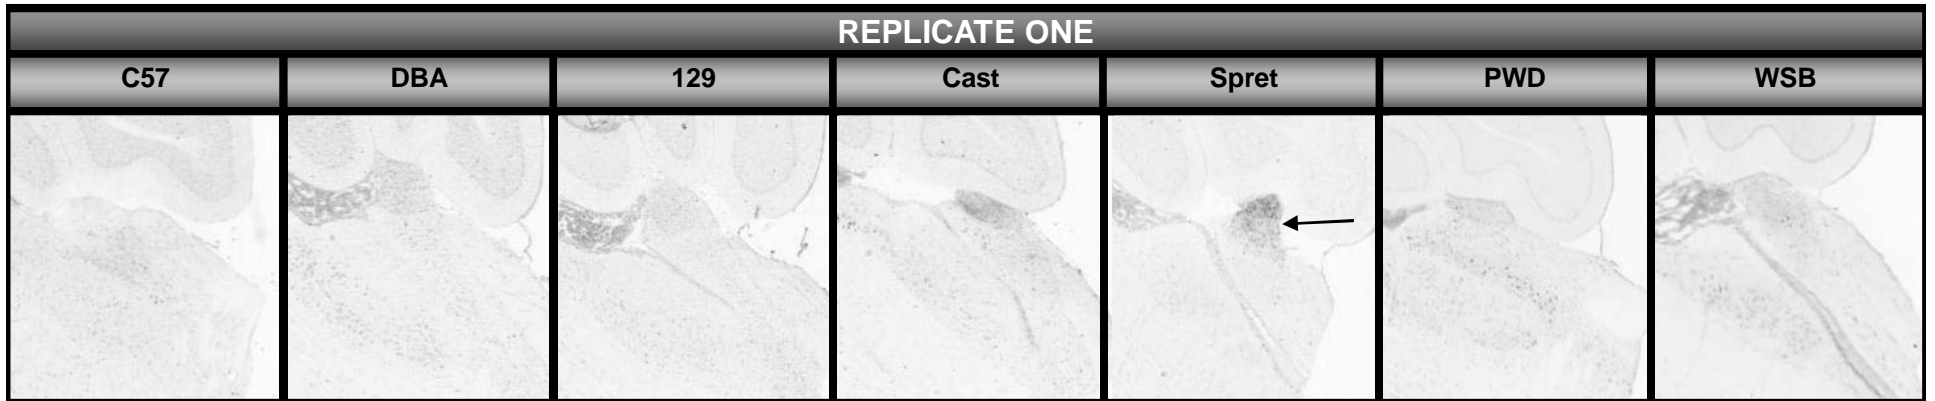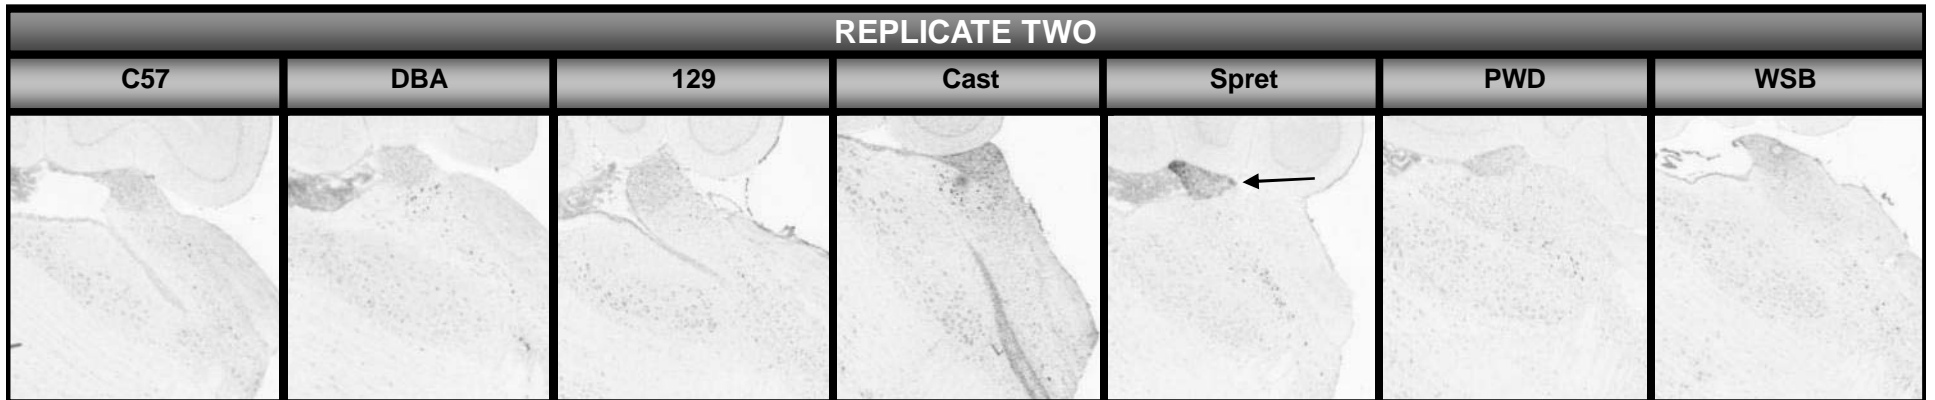

AP: ... < Spret

*The Spret strain shows greater density and intensity of estrogen receptor alpha (Esr1) expression in the area postrema*

**Esr2**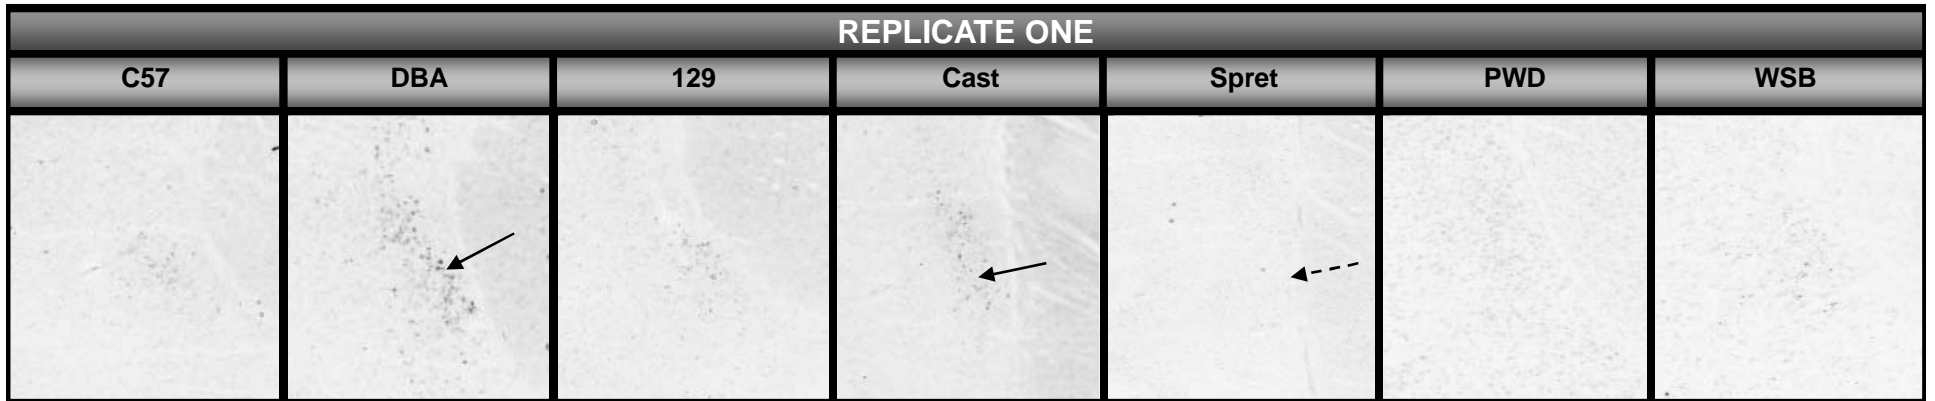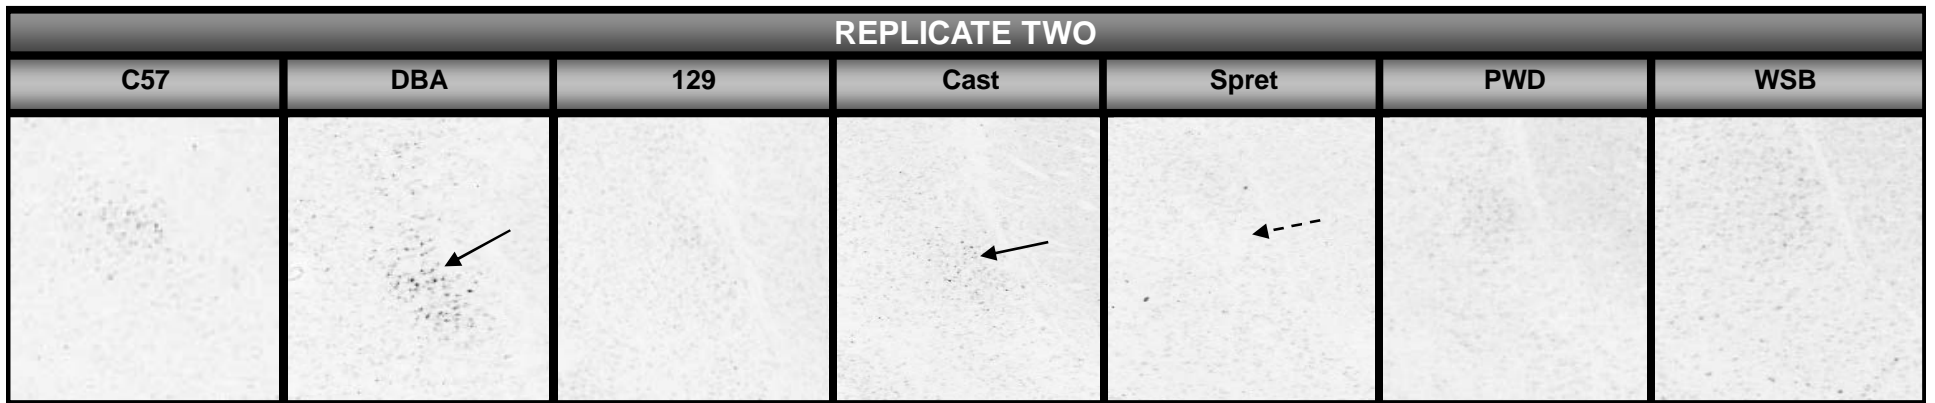

**CLA: Spret < ... < DBA, Cast**

*The Spret strain shows lower density and intensity of estrogen receptor beta (Esr2) expression in the claustrum; the DBA and Cast strains show greater*



**Esr2**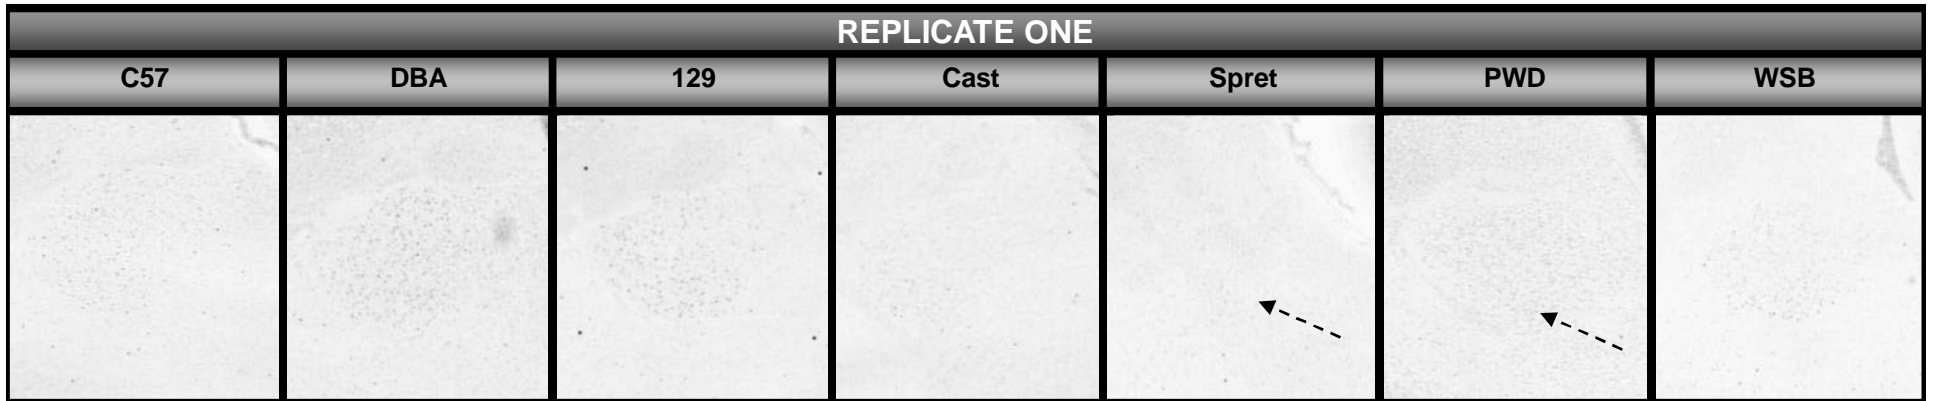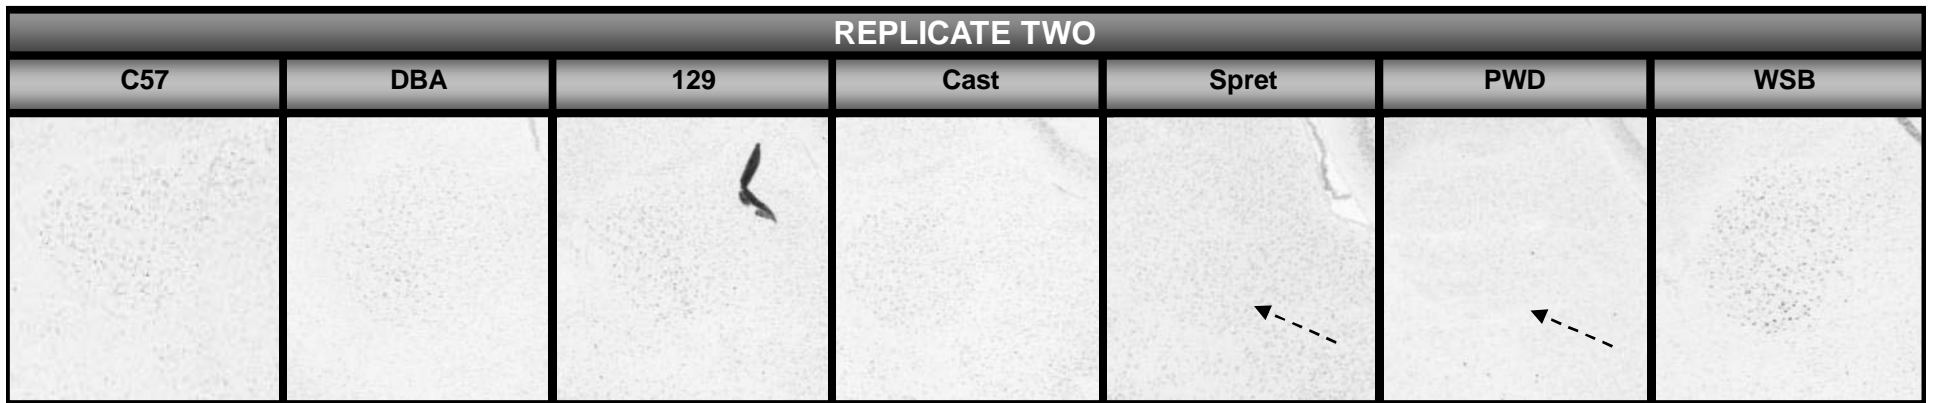

**BLA: Spret, PWD < ...**

---

*The Spret and PWD strains show lower density and intensity of estrogen receptor beta (Esr2) expression in the basolateral amygdalar nucleus*

**Esr2**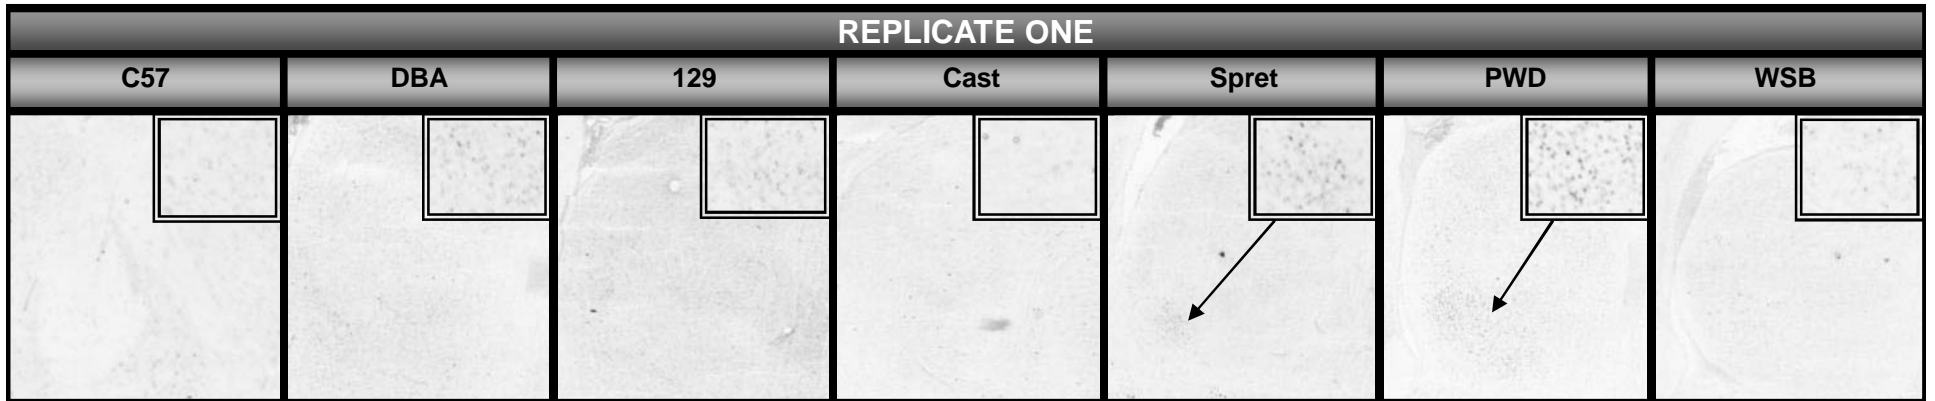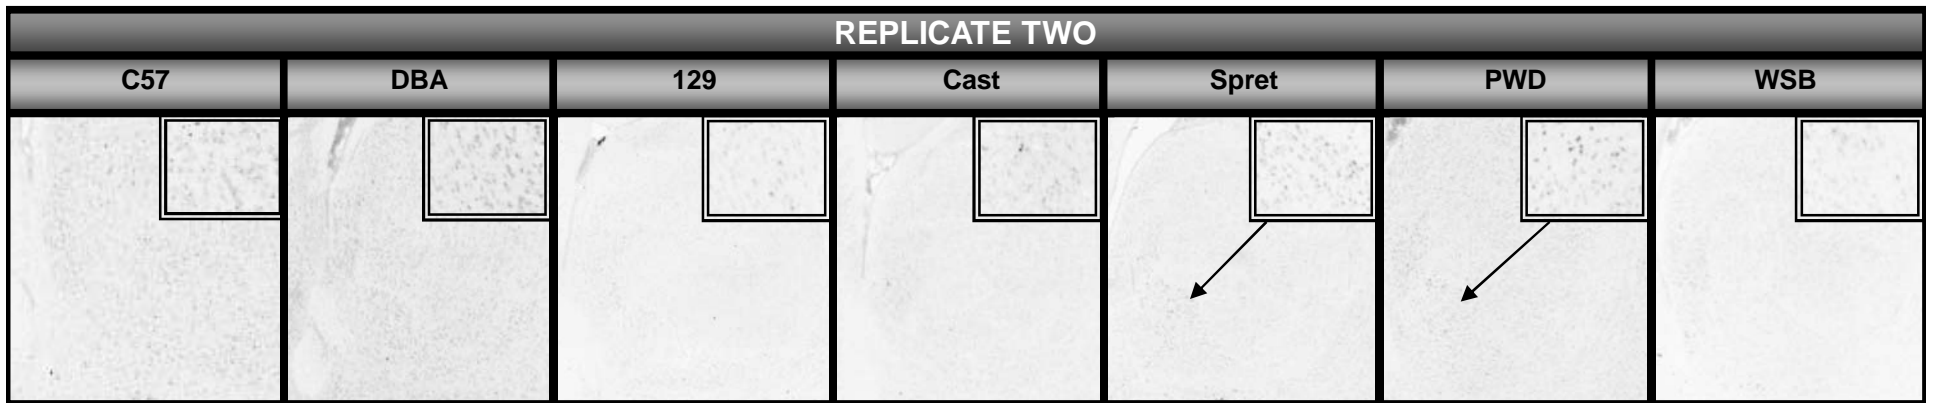

RE: ... < Spret, PWD

*The Spret and PWD strains show greater density and intensity of estrogen receptor beta (Esr2) expression in the nucleus of neurons*

**Esr2**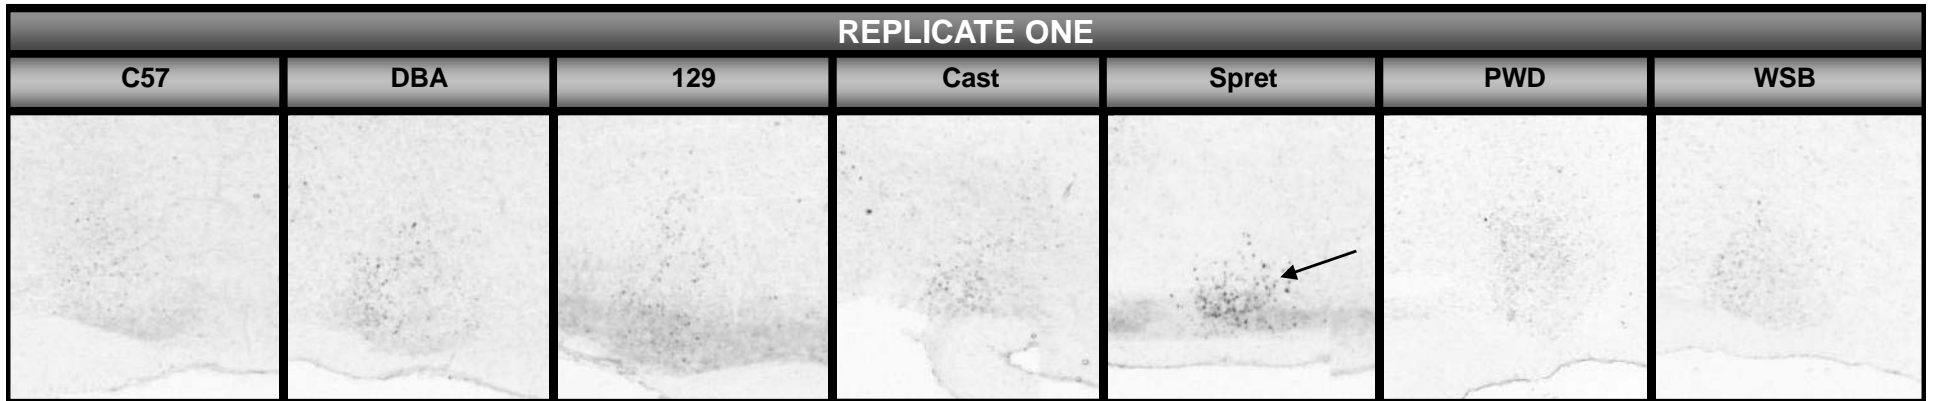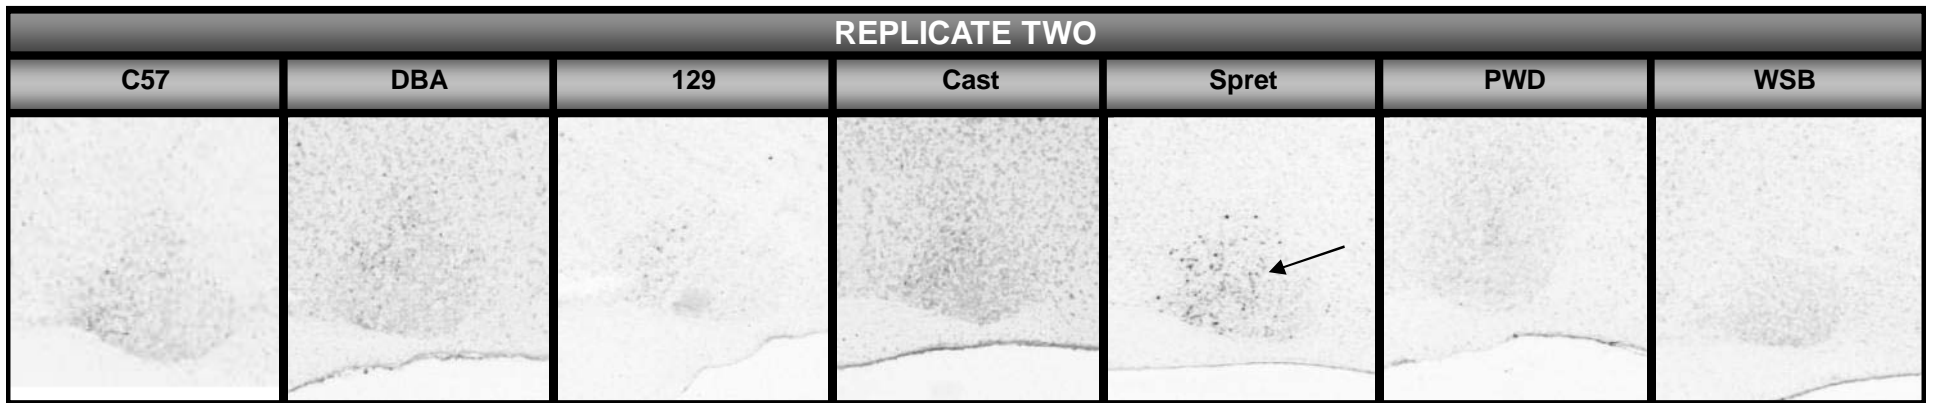

**SCH: ... < Spret**

---

*The Spret strain shows greater density and intensity of estrogen receptor beta (Esr2) expression in the suprachiasmatic nucleus*

↙ ↘  
**Faah**

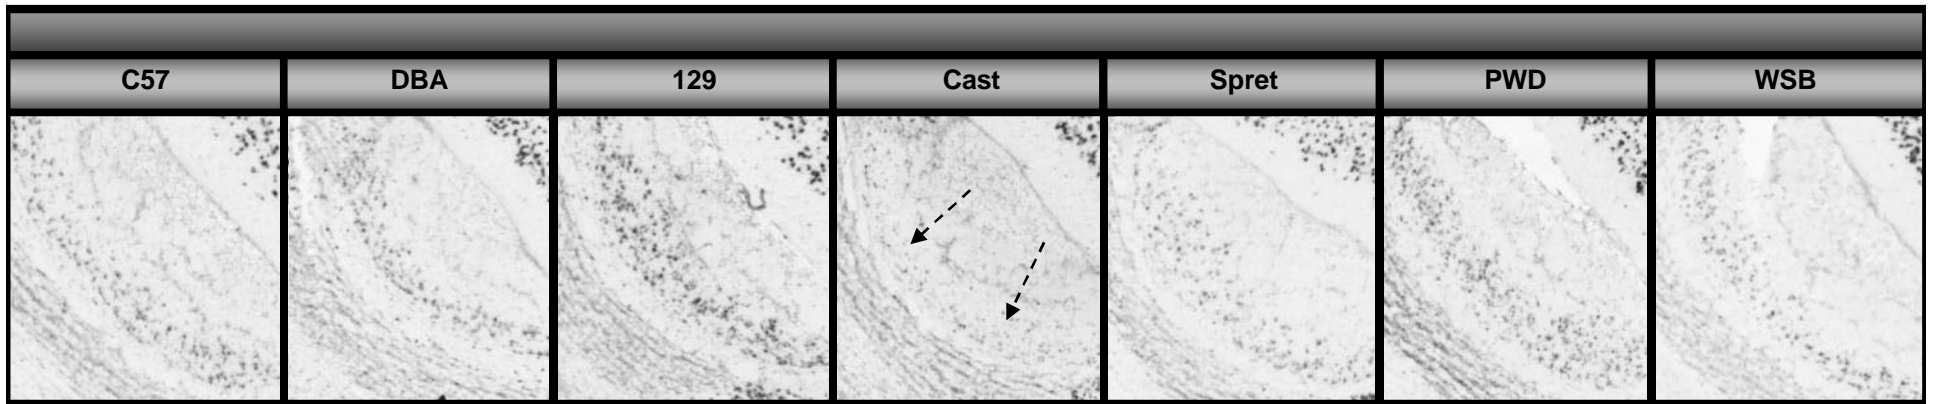

**AOBmi: Cast < ...**

---

*The Cast strain shows lower density and intensity of fatty acid amide hydrolase (Faah) expression in the accessory olfactory bulb, mitral layer*

## Gabra3

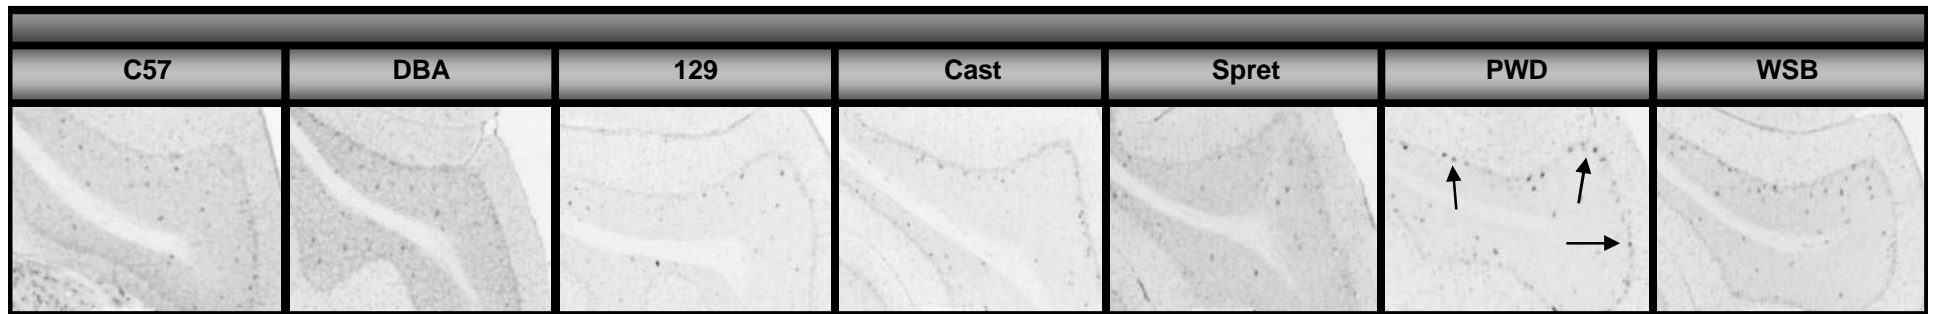

CBX(gr): ... < PWD

---

*The PWD strain shows greater density and intensity of gamma-aminobutyric acid receptor, subunit alpha 3 (Gabra3) expression in the superficial portion of the cerebellar cortex granule layer*

## Gabrb1

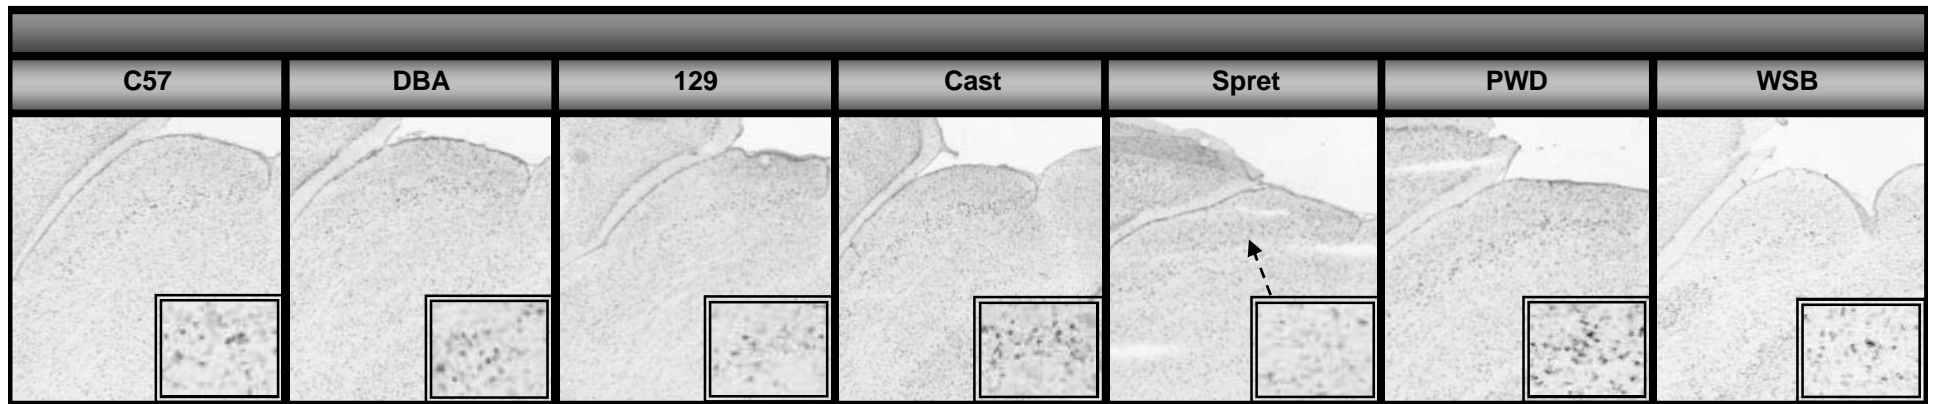

SCs: Spret < ...

---

*The Spret strain shows lower density and intensity of gamma-aminobutyric acid receptor, subunit beta 1 (Gabrb1) in the superior colliculus, sensory related*

## Gnrh1

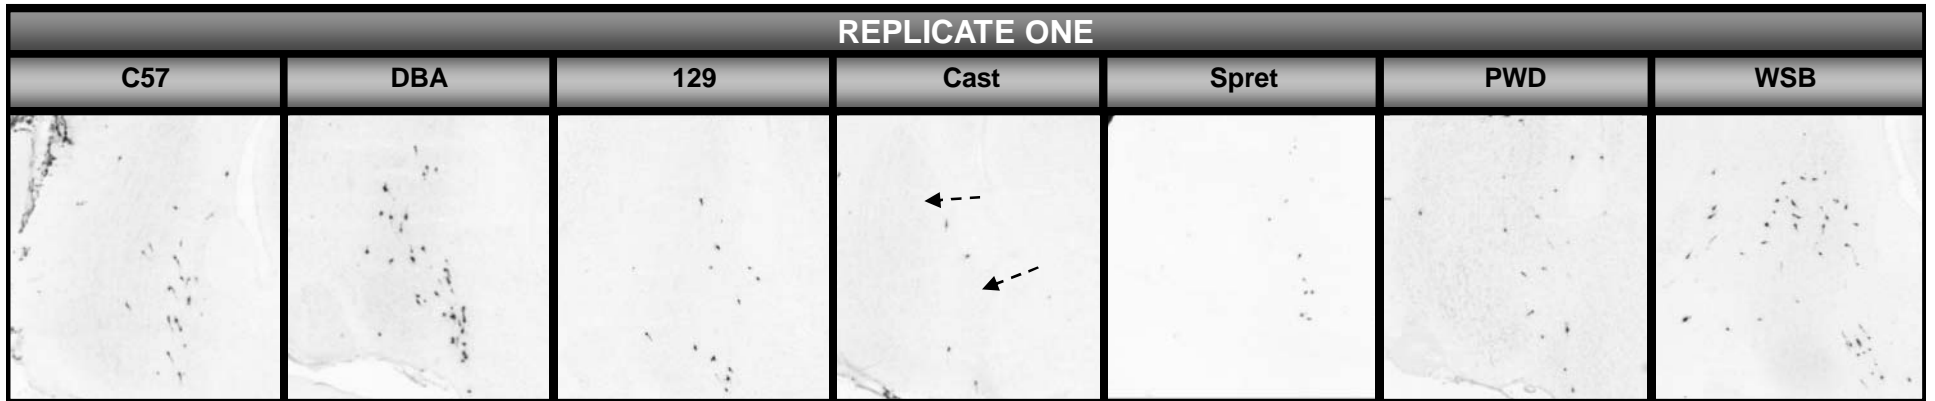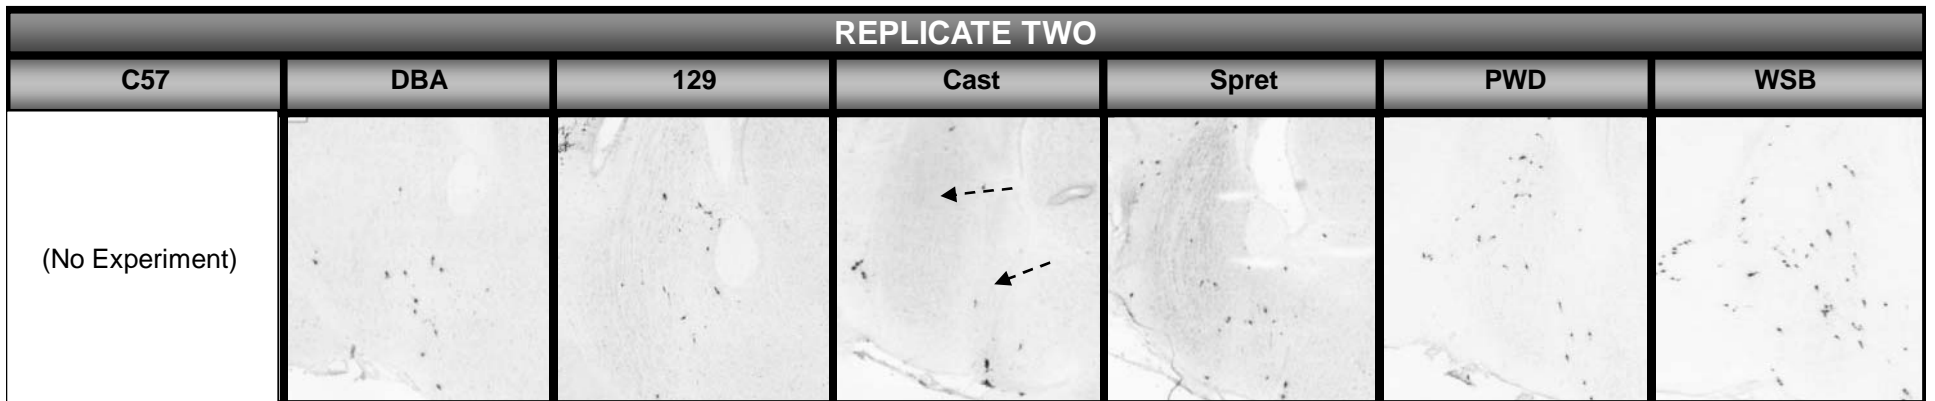

**MPO: Cast < ...**

*The Cast strain shows lower density of gonadotropin releasing hormone 1 (Gnrh1) expression in the medial preoptic area*

## Hrh1

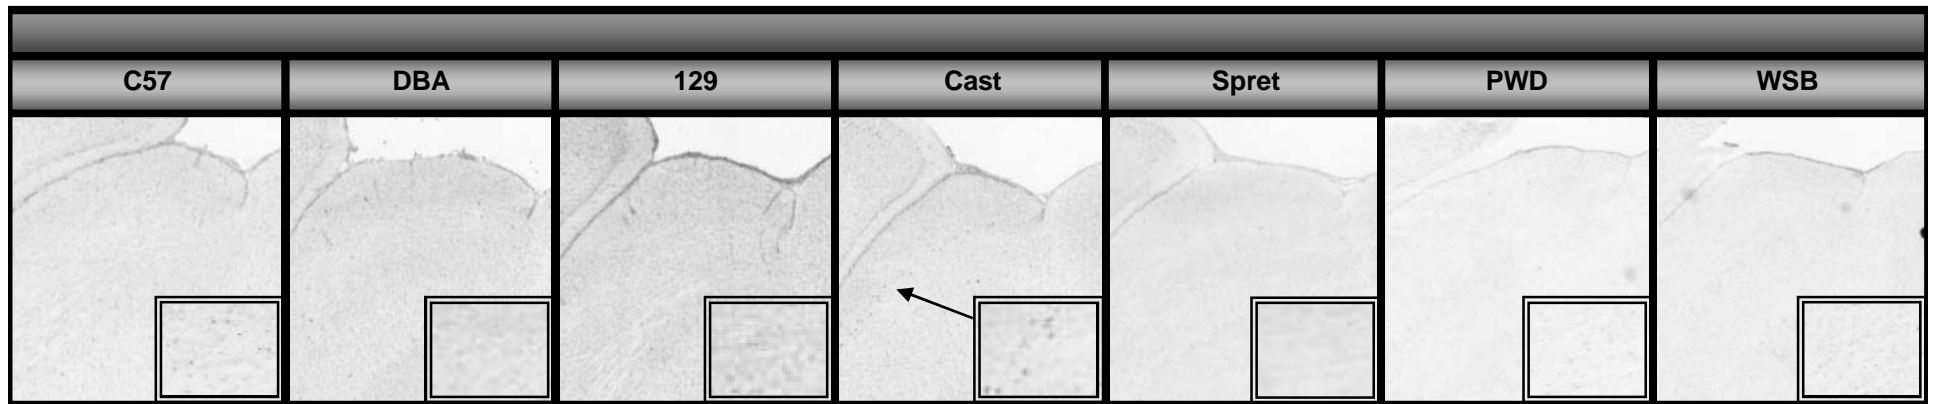

SCs: ... < Cast

---

*The Cast strain shows greater density and intensity of histamine receptor H 1 (Hrh1) expression in the superior colliculus, sensory related*



**Htr1a**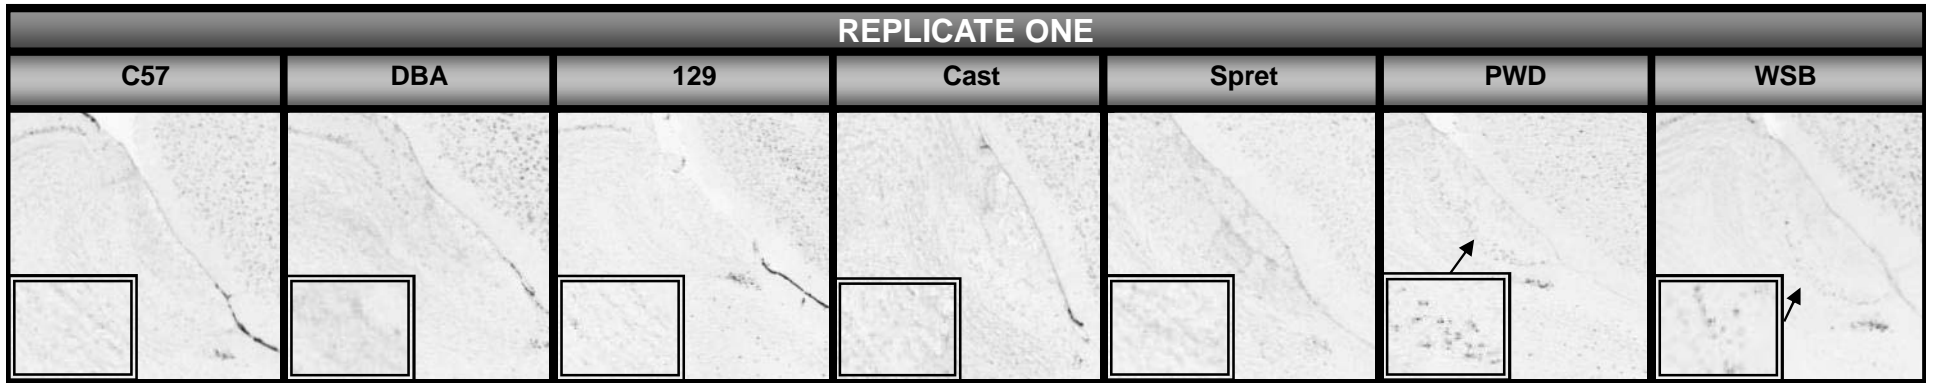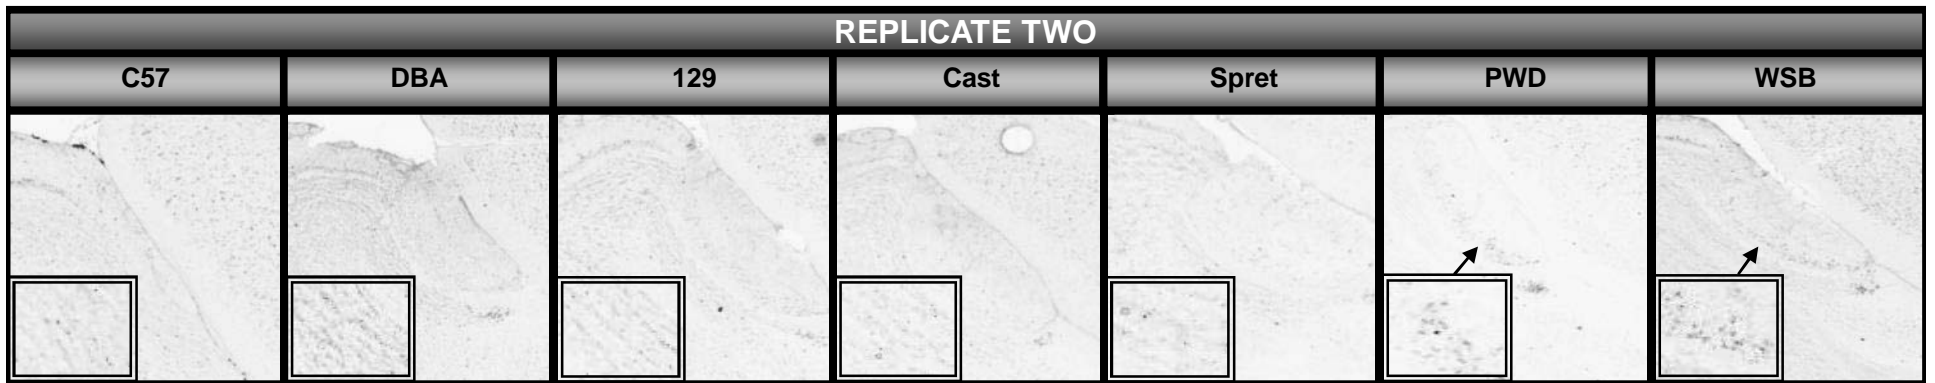

**AOB: ... < PWD, WSB**

---

*The PWD and WSB strains show greater density and intensity of 5-hydroxytryptamine receptor 1A (Htr1a) expression in the accessory olfactory bulb*

**Htr1a**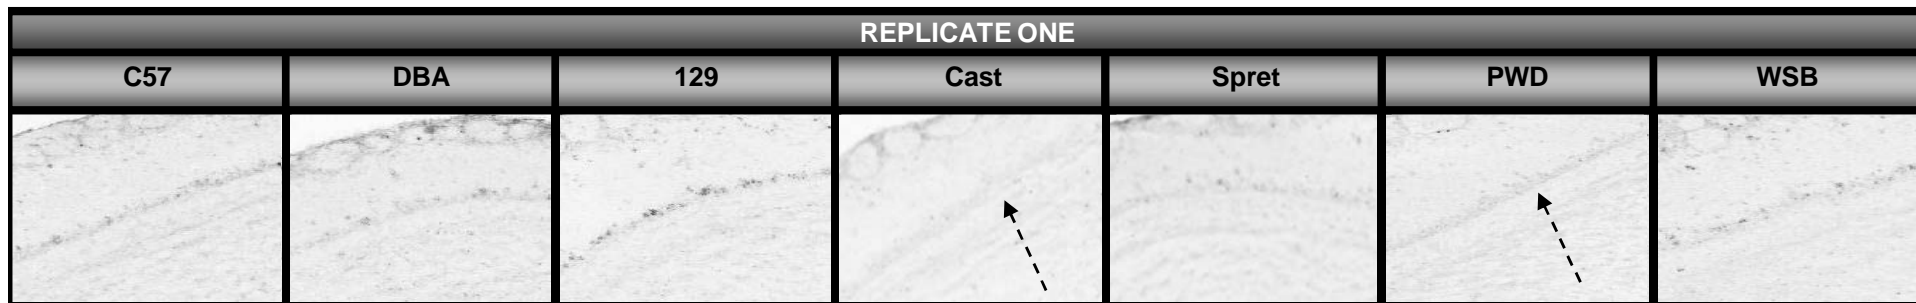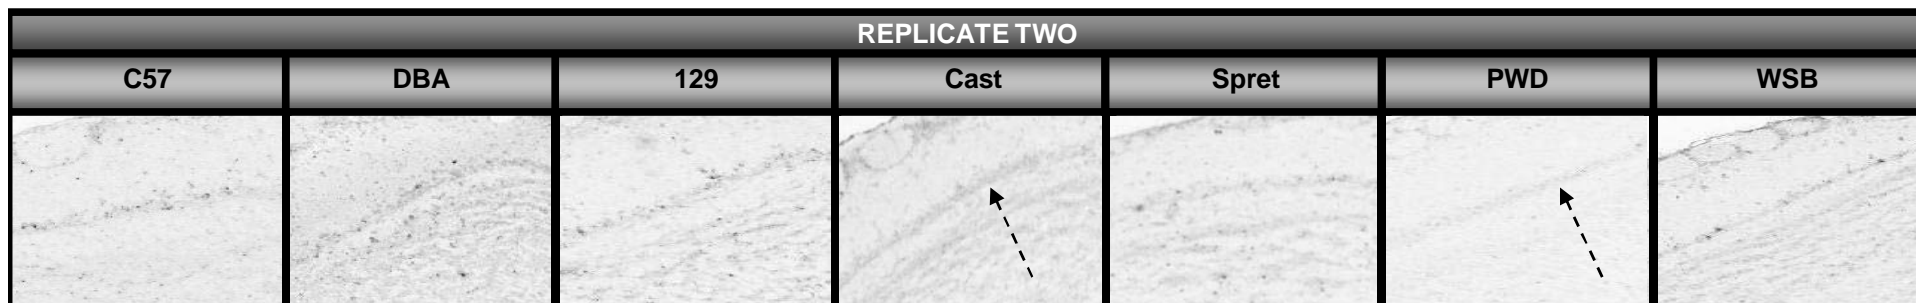

**MOBmi: Cast, PWD < ...**

---

*The Cast and PWD strains show lower density and intensity of 5-hydroxytryptamine receptor 1A (Htr1a) expression in the main olfactory bulb, mitral layer*

**Htr1a**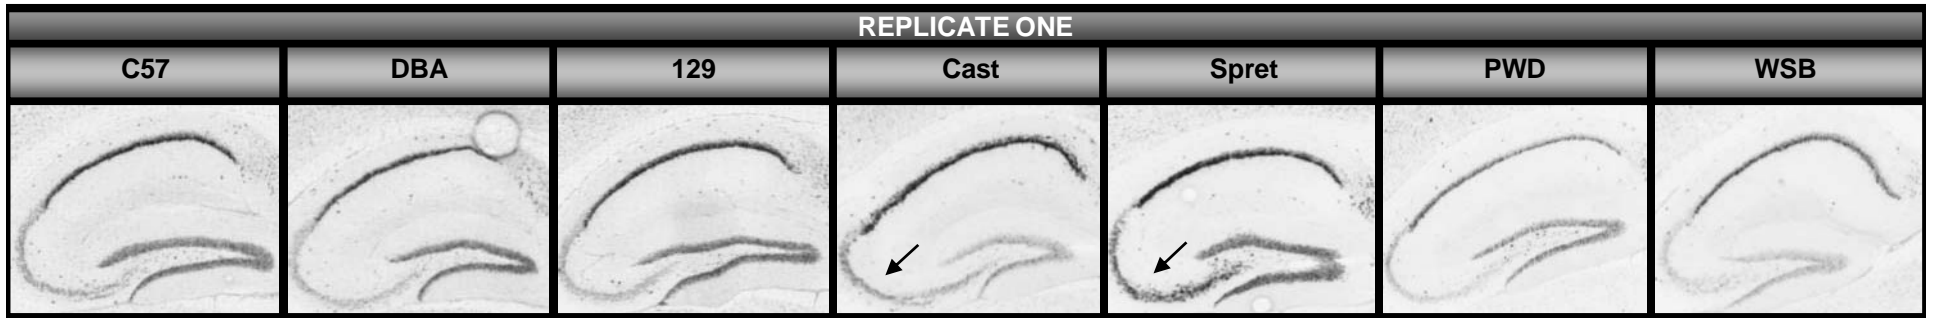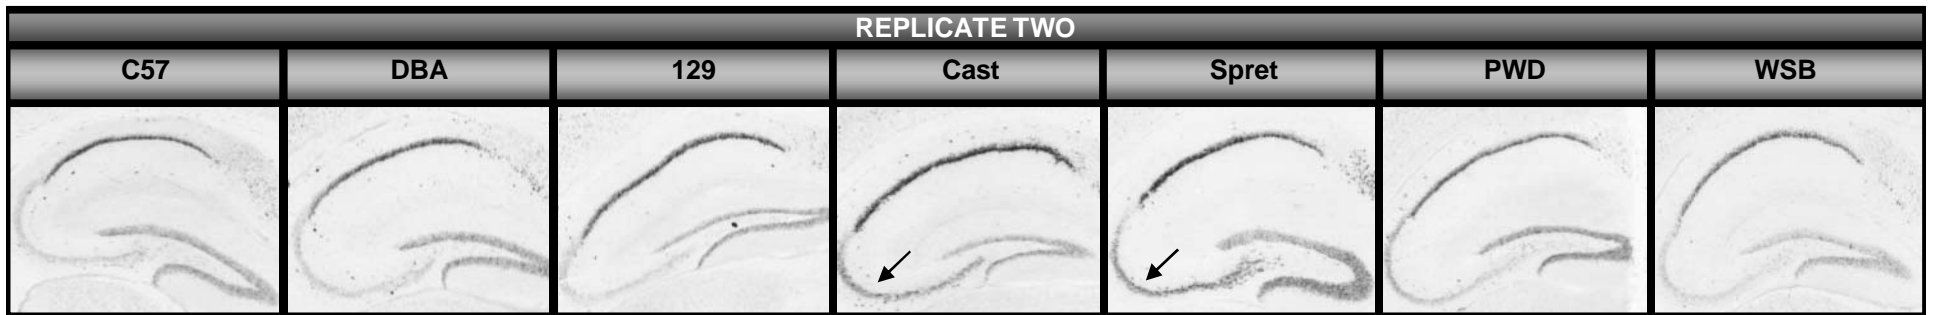

**CA3sp: ... < Spret, Cast**

*The Spret and Cast strains show greater density and intensity of 5-hydroxytryptamine receptor 1A (Htr1a) expression in the cornu ammonis field 3, pyramidal layer*

**Htr1a**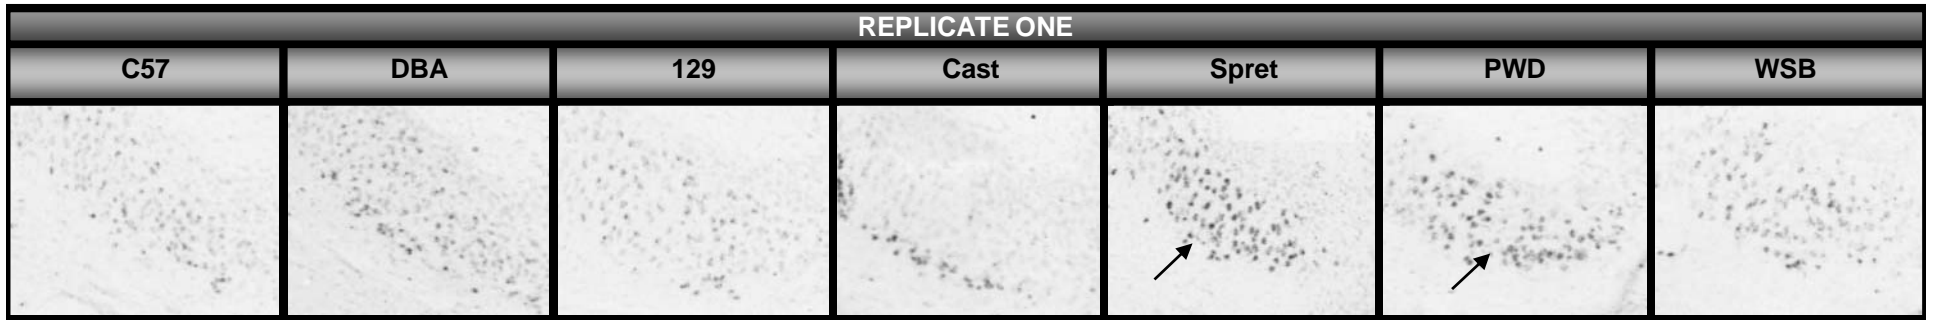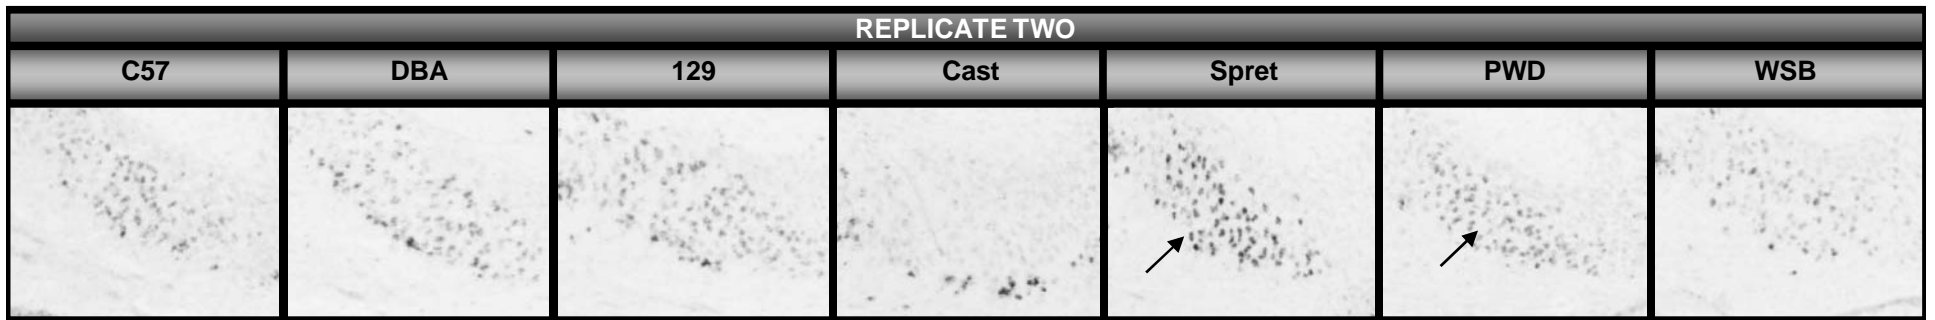

**SUB: ... < Spret, PWD**

---

*The Spret and PWD strains show greater density and intensity of 5-hydroxytryptamine receptor 1A (Htr1a) expression in the subiculum*

**Htr1a**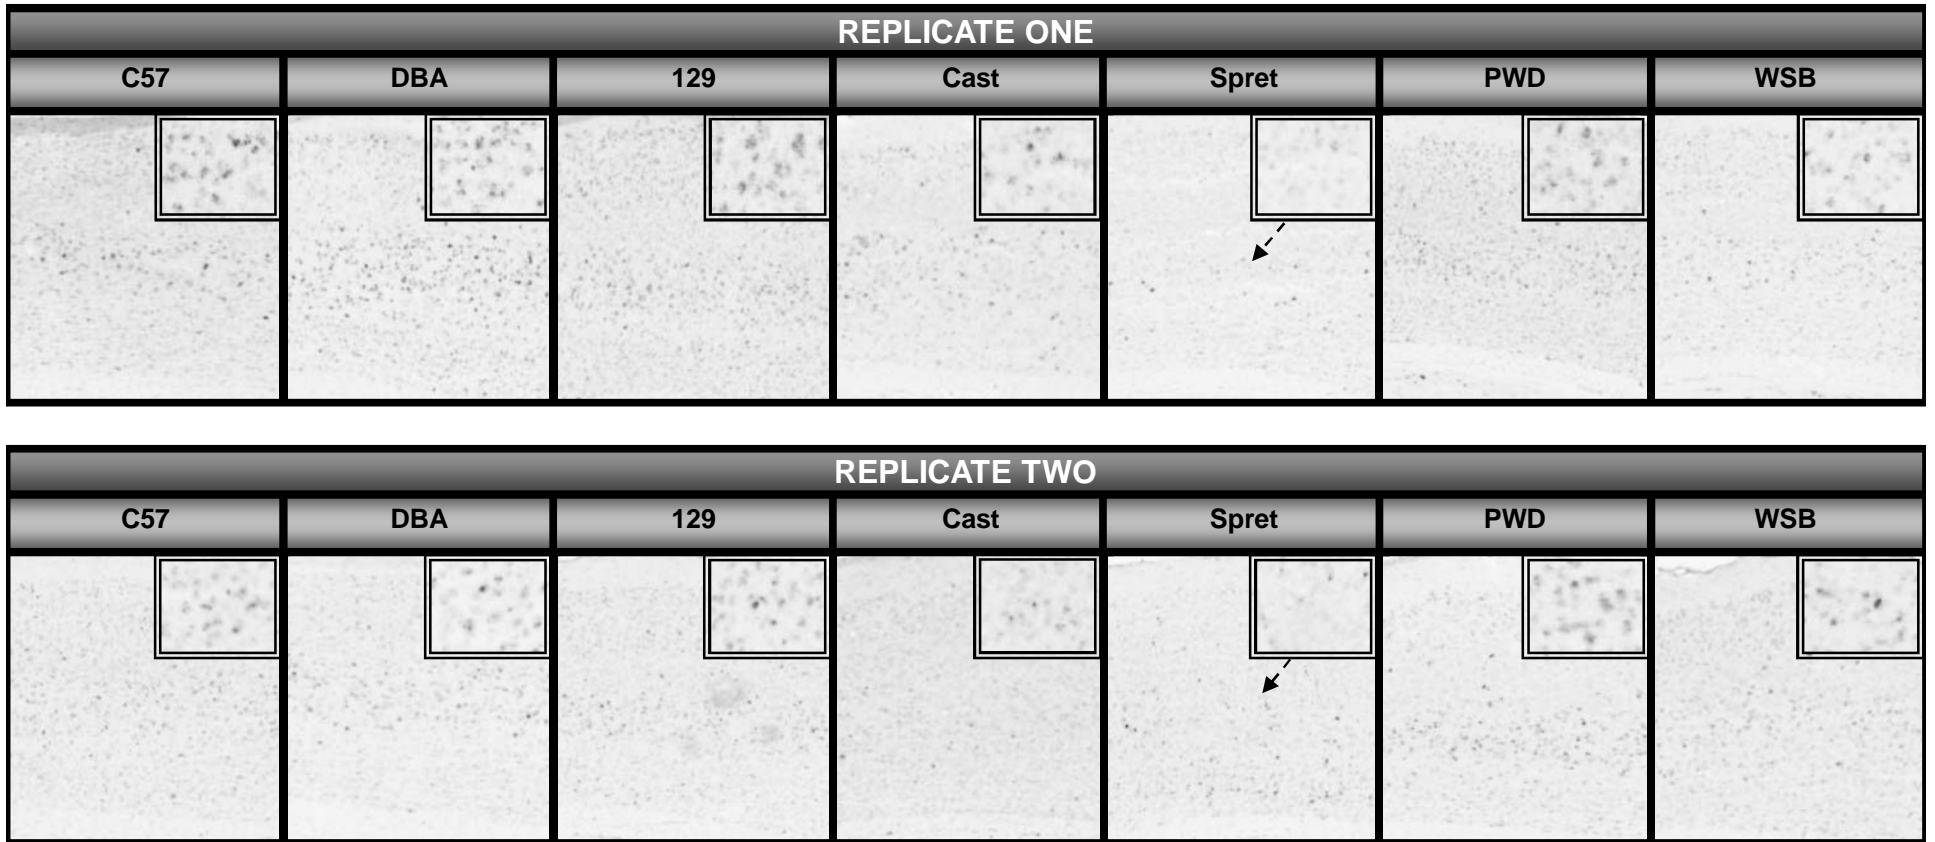

**VIS(5): Spret < ...**

---

*The Spret strain shows lower density of 5-hydroxytryptamine receptor 1A (Htr1a) expression in the underlying layer 5 cells (not large and scattered) of the visual cortex*

**Htr1a**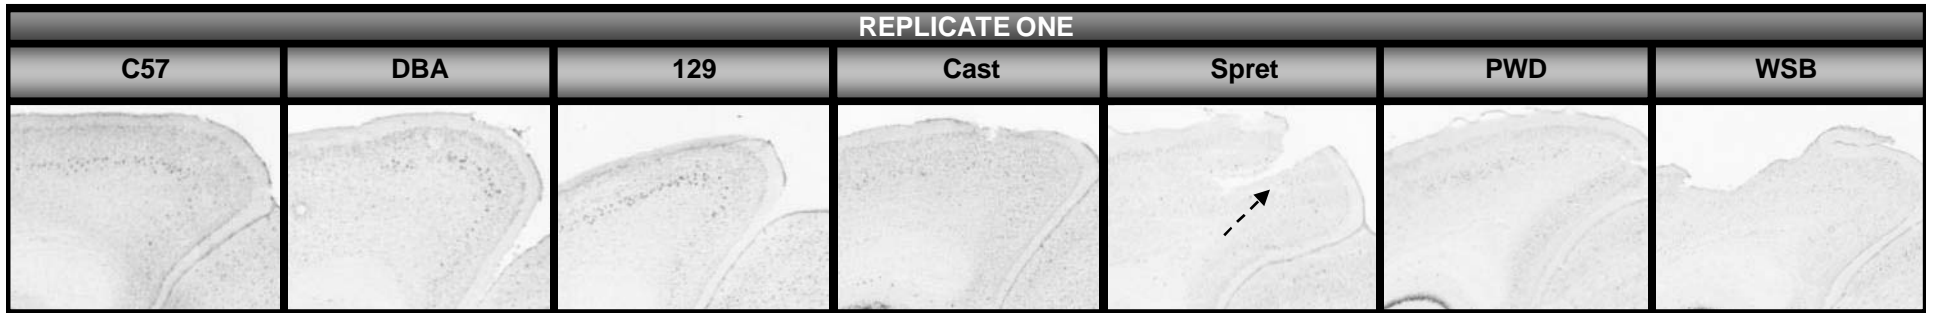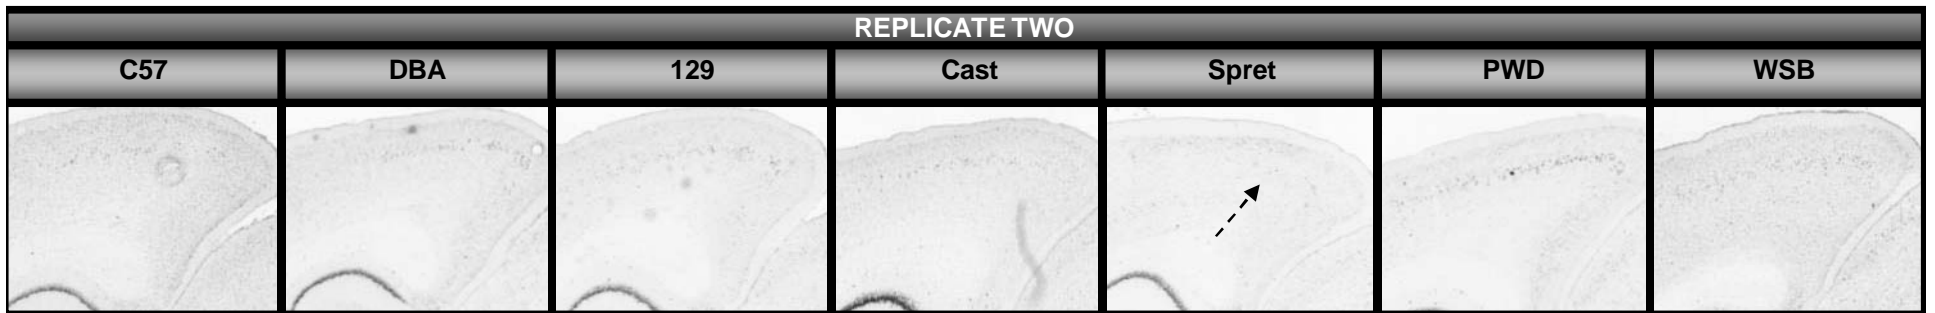

**RSPd(5): Spret < ...**

*The Spret strain shows lower density and intensity of 5-hydroxytryptamine receptor 1A expression (Htr1a) in layer 5 of the retrosplenial area, dorsal part*

**Htr1a**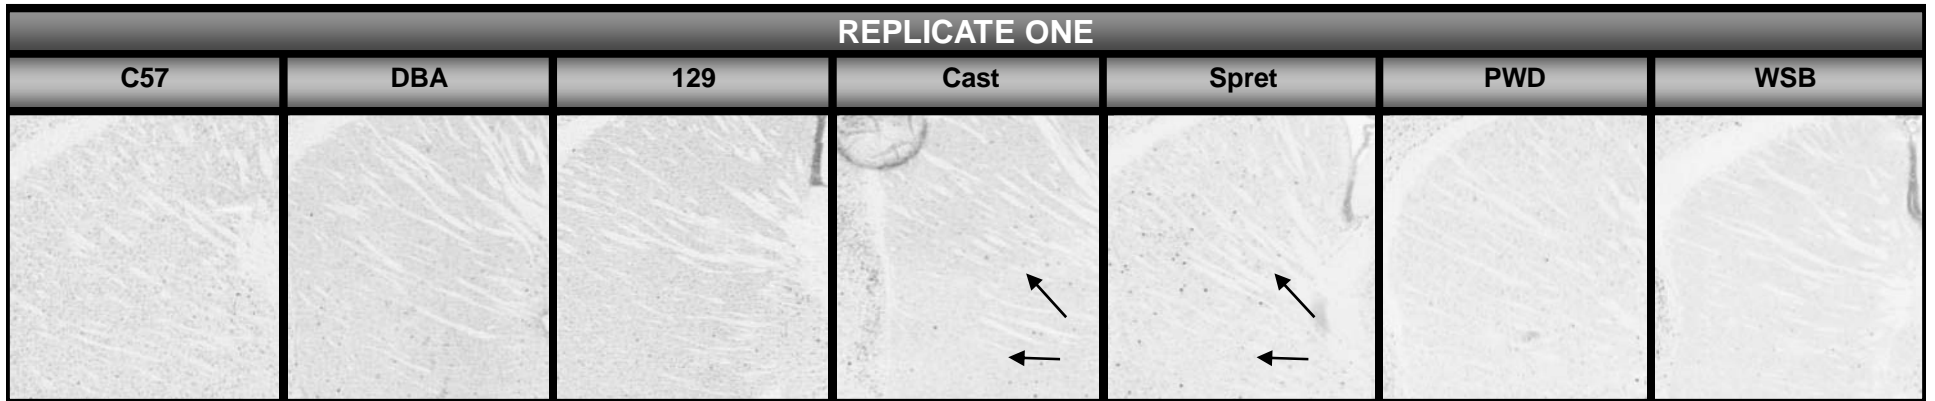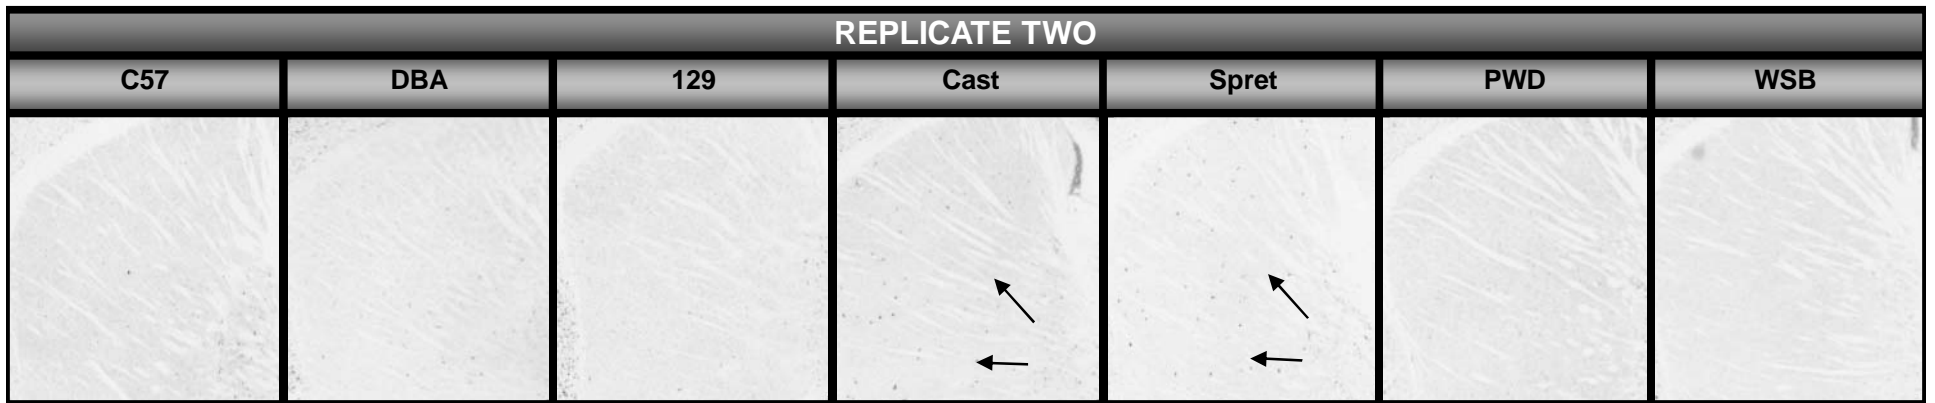

CP: ... < Cast, Spret

*The Spret and Cast strains show greater density and intensity of 5-hydroxytryptamine receptor 1A (Htr1a) expression in the caudate putamen*

**Htr1a**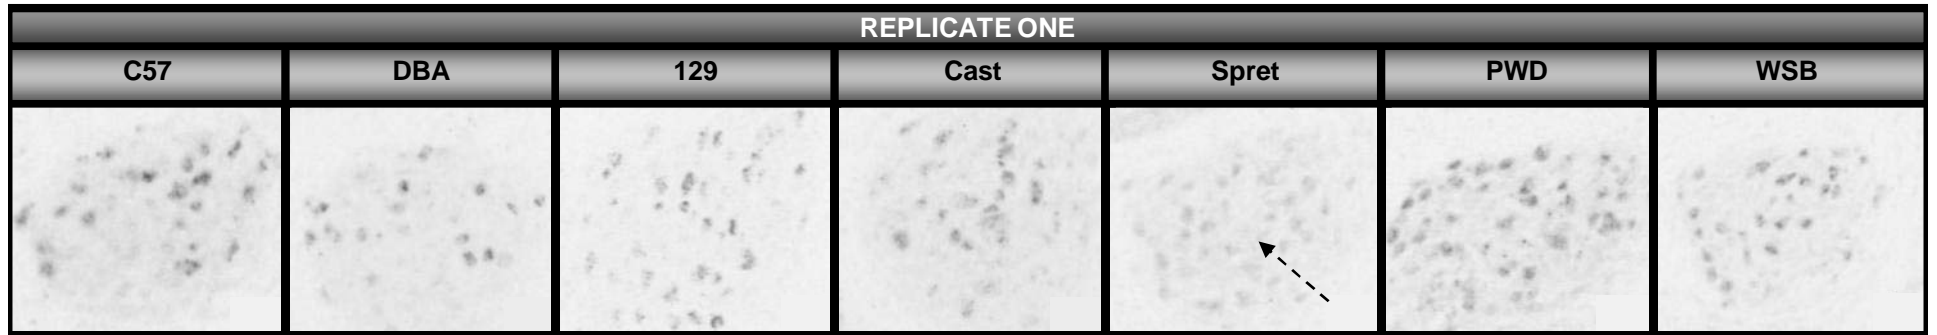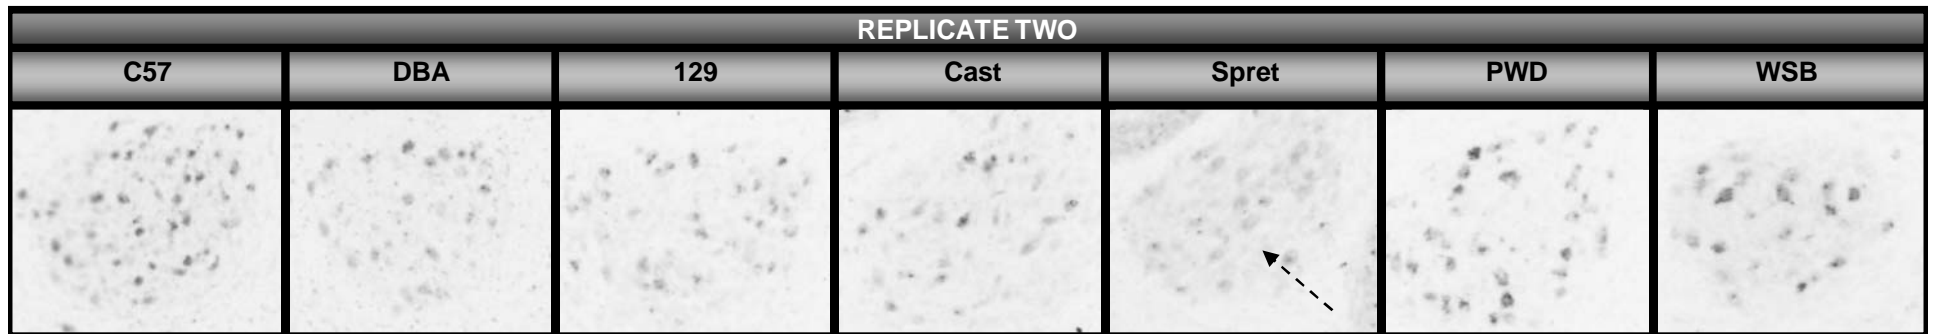

**FN: Spret < ...**

---

*The Spret strain shows lower density and intensity of 5-hydroxytryptamine (serotonin) receptor 1A (Htr1a) expression in the fastigial nucleus*



**Htr1b**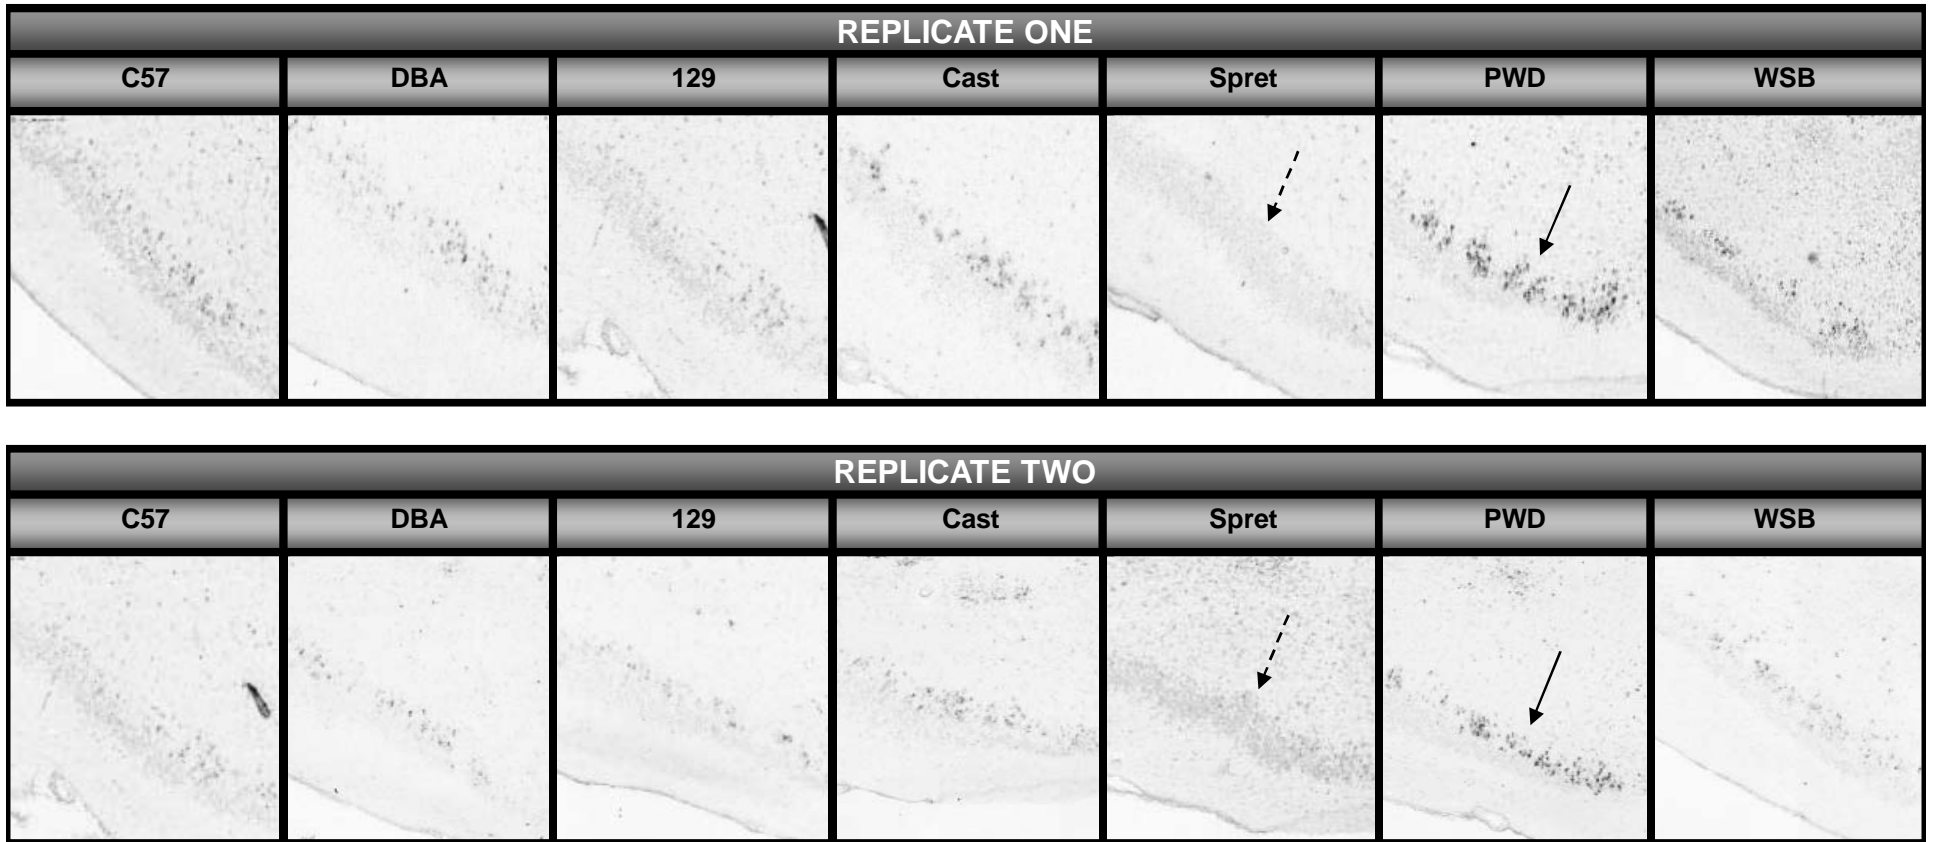

**PIR(2): Spret < ... < PWD**

*The Spret strain shows lower density of 5-hydroxytryptamine receptor 1B (Htr1b) expression in the piriform area, pyramidal layer; the PWD strain shows greater*

**Htr1b**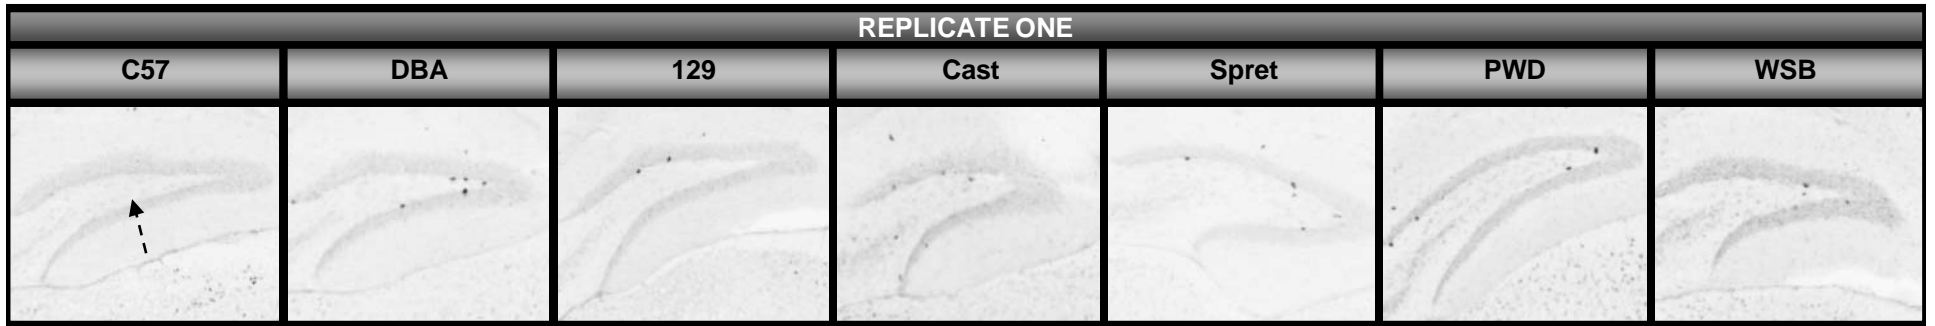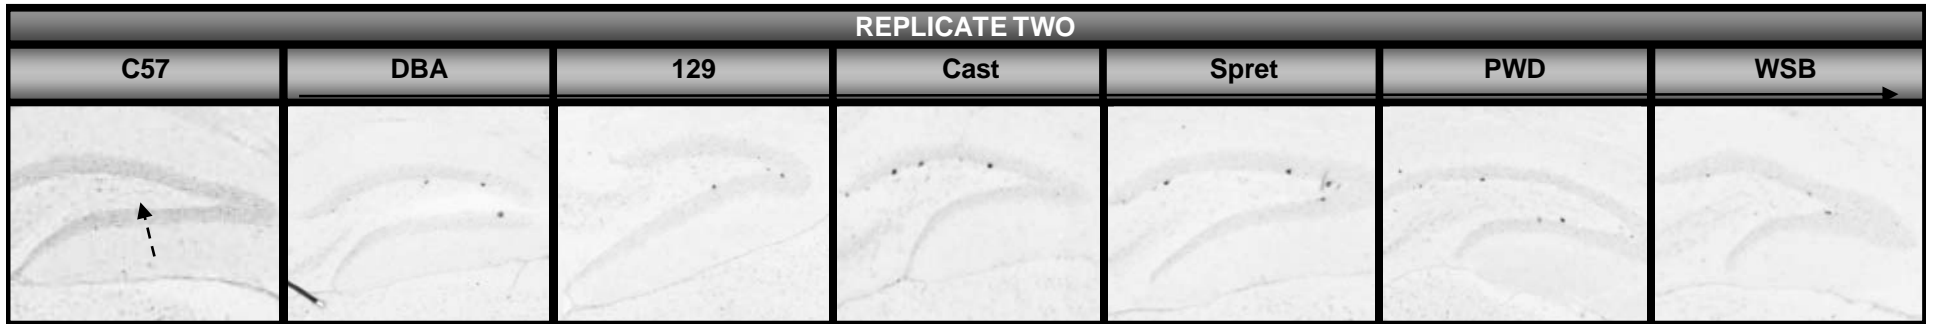

DG(po): C57 < ...

---

*The C57 strain shows lower density of 5-hydroxytryptamine receptor 1B (Htr1b) expression in the dentate gyrus, polymorph layer*

**Htr1b**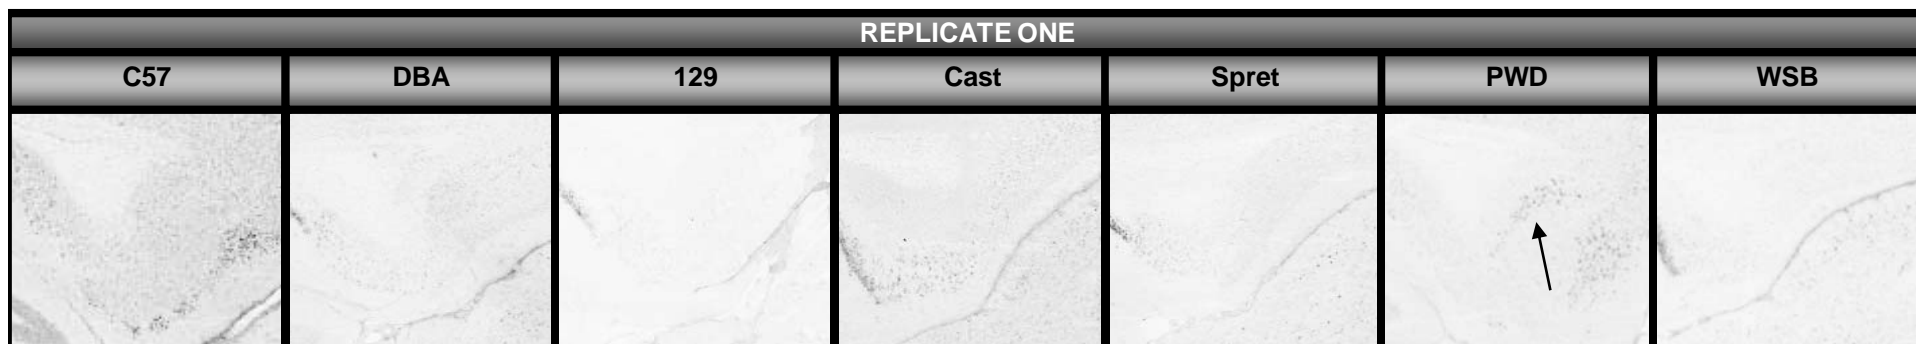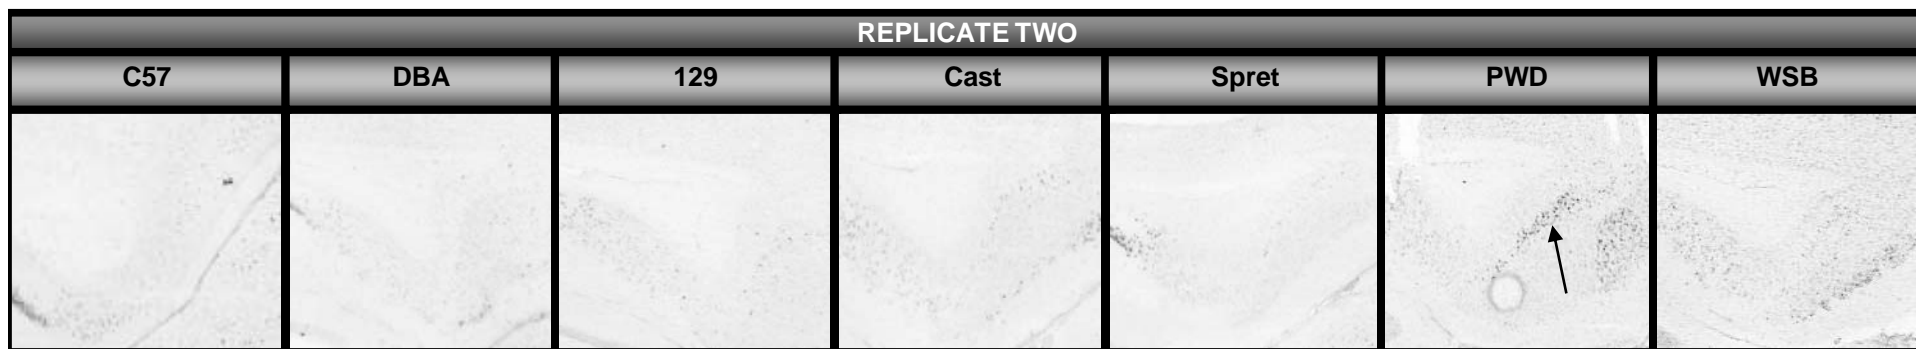**POST: ... < PWD**

---

*The PWD strain shows greater density and intensity of 5-hydroxytryptamine receptor 1B (Htr1b) expression in the postsubiculum*

**Htr1b**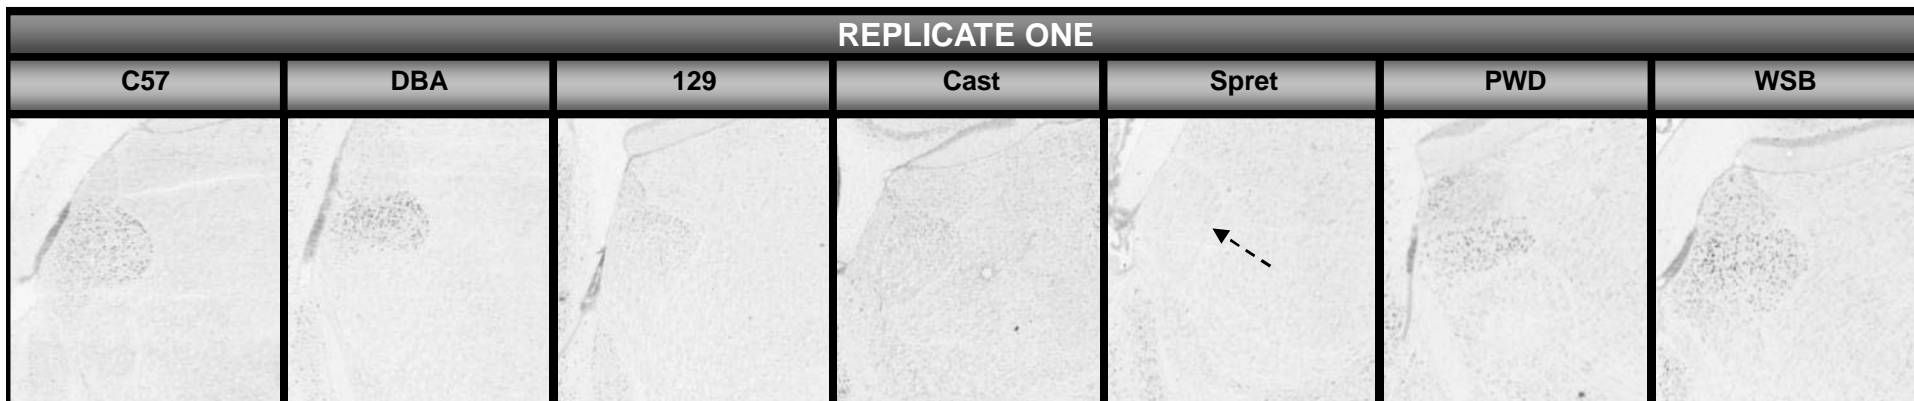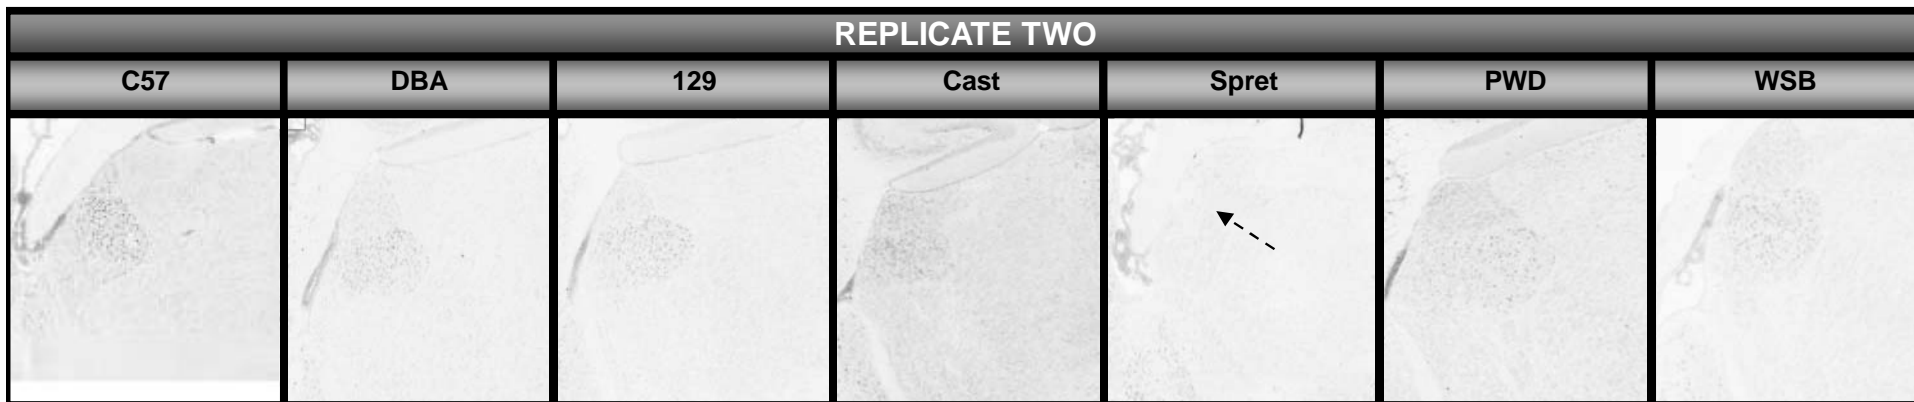

**AV: Spret < ...**

---

*The Spret strain shows lower density and intensity of 5-hydroxytryptamine receptor 1B (Htr1b) expression in the anteroventral nucleus of thalamus*

**Htr2a**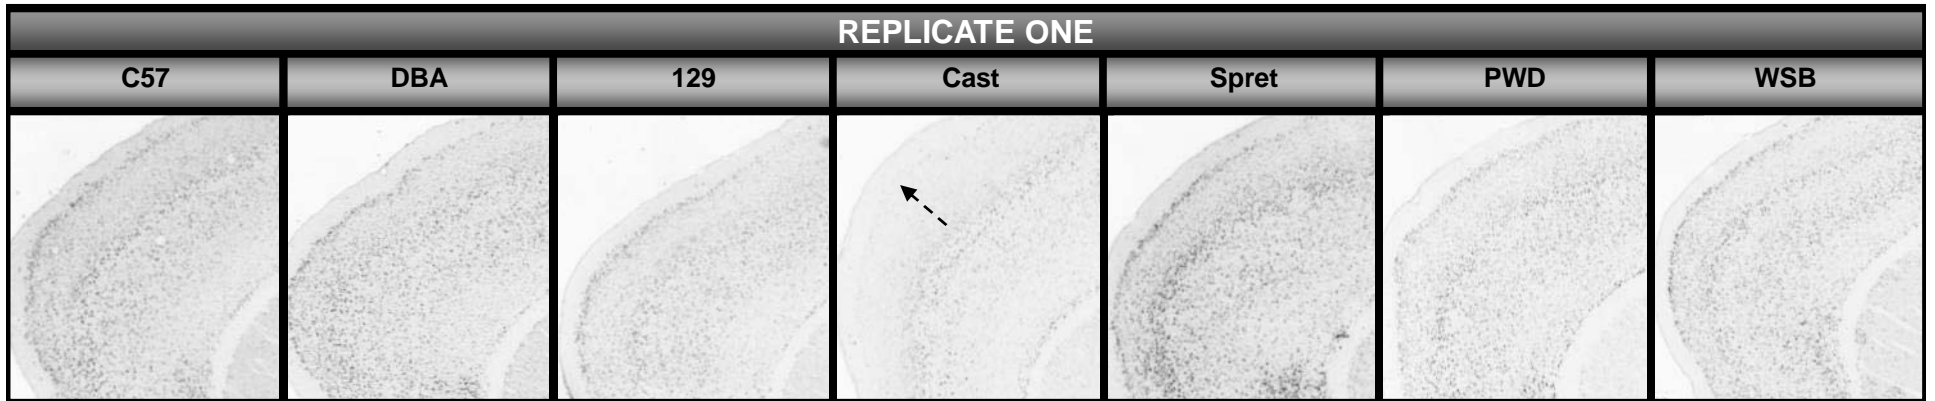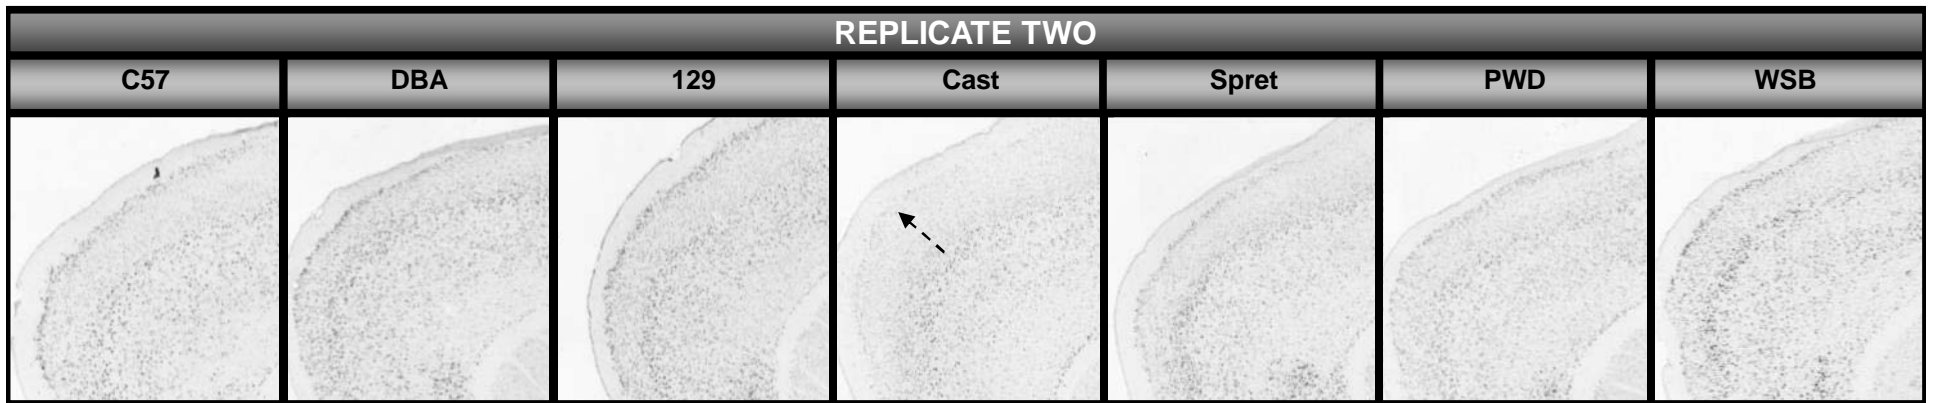

**MO(2/3): Cast < ...**

---

*The Cast strain shows lower density and intensity of 5-hydroxytryptamine receptor 2A (Htr2a) expression in the superficial portion of layer 2/3 of the motor cortex*

**Htr2a**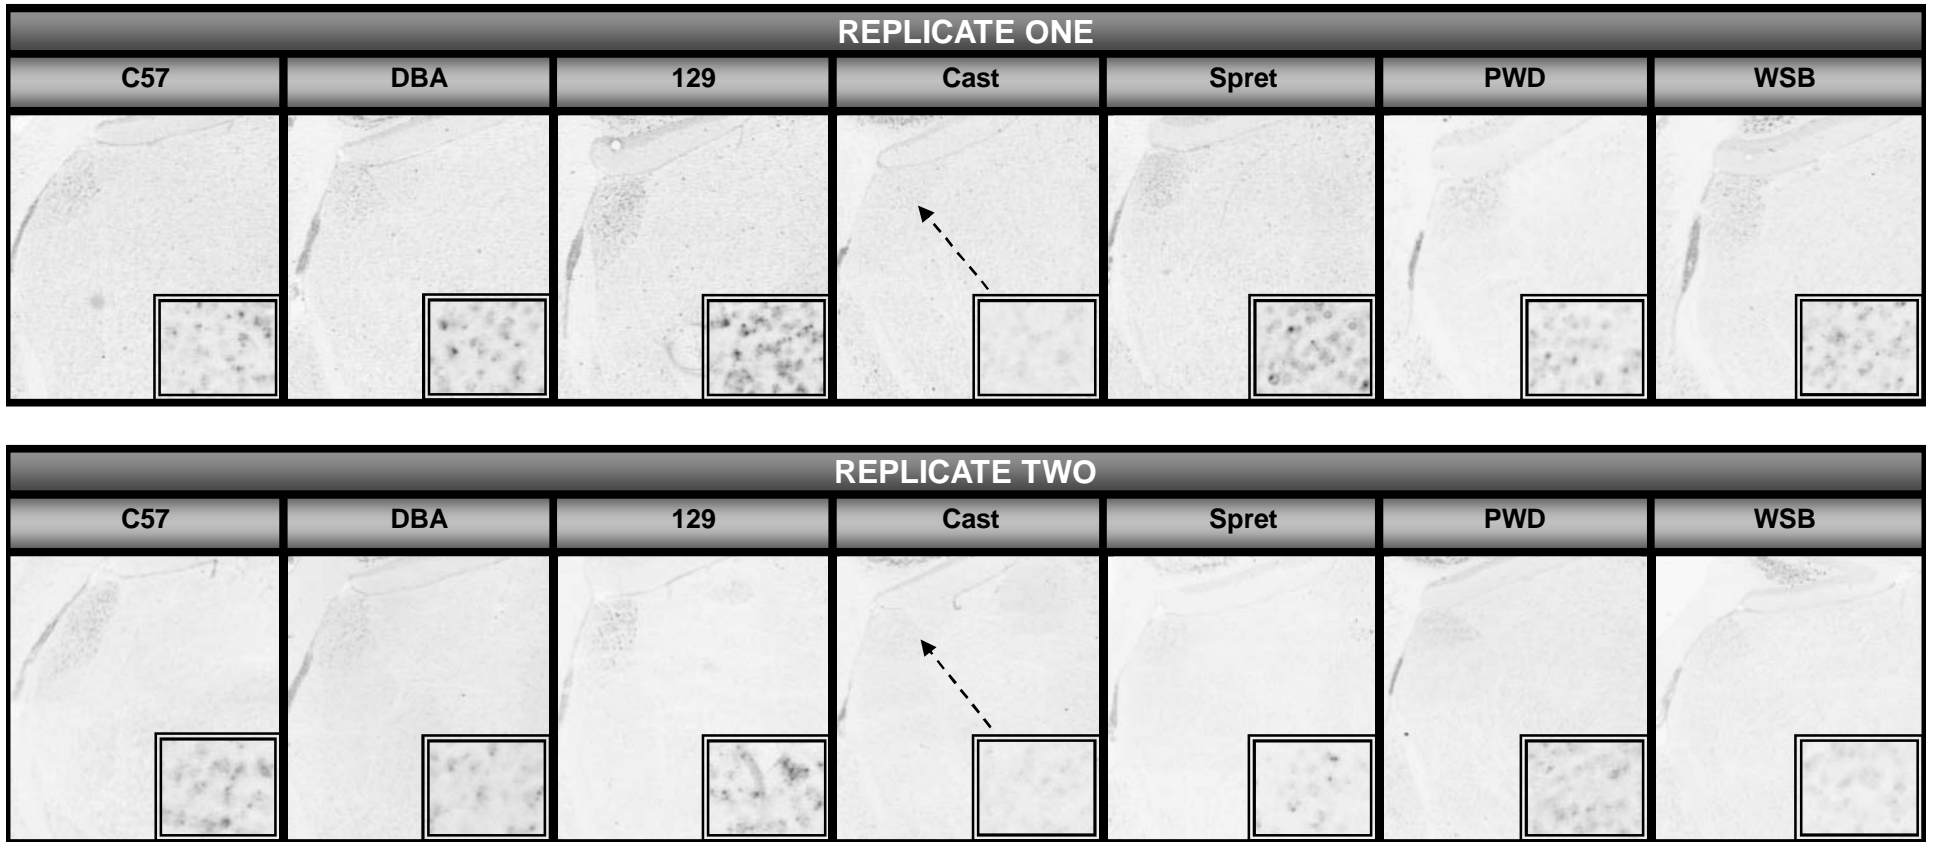

**AD: Cast < ...**

*The Cast strain shows lower density and intensity of 5-hydroxytryptamine receptor 2A (Htr2a) expression in the anterodorsal nucleus of thalamus*

**Maob**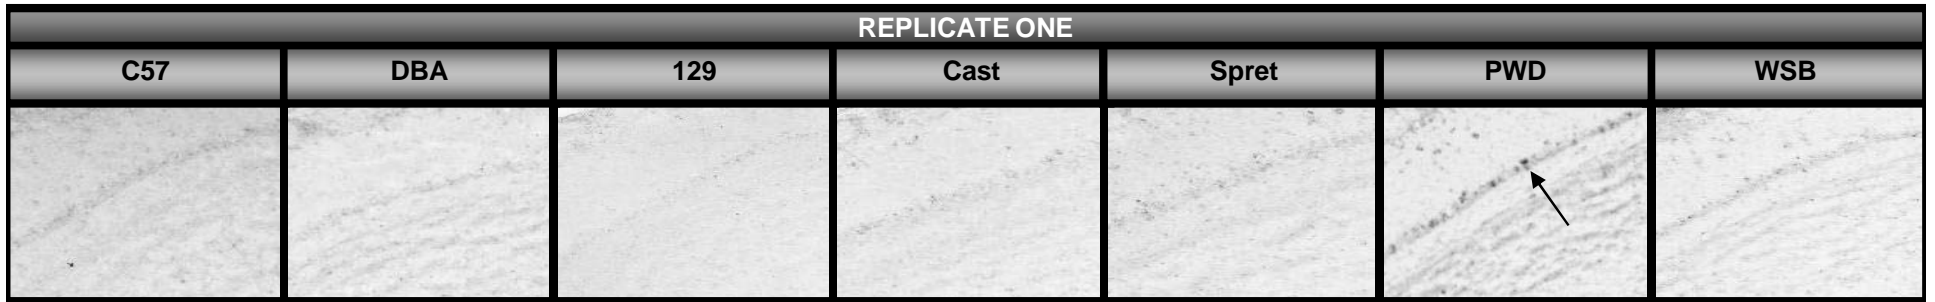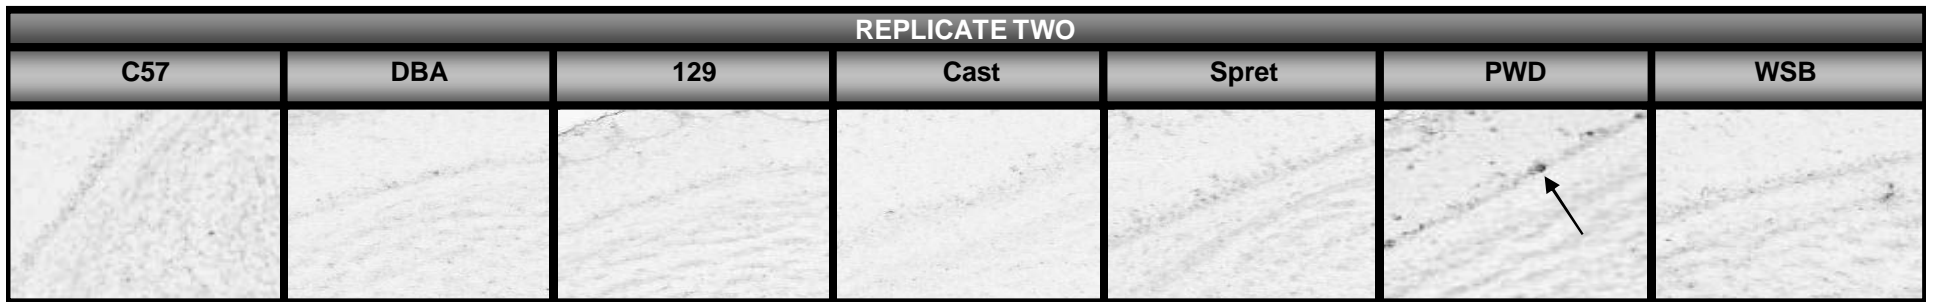

**MOBmi: ... < PWD**

---

*The PWD strain shows greater density and intensity of monamine oxidase B (Maob) expression in the main olfactory bulb, mitral layer*

**Maob**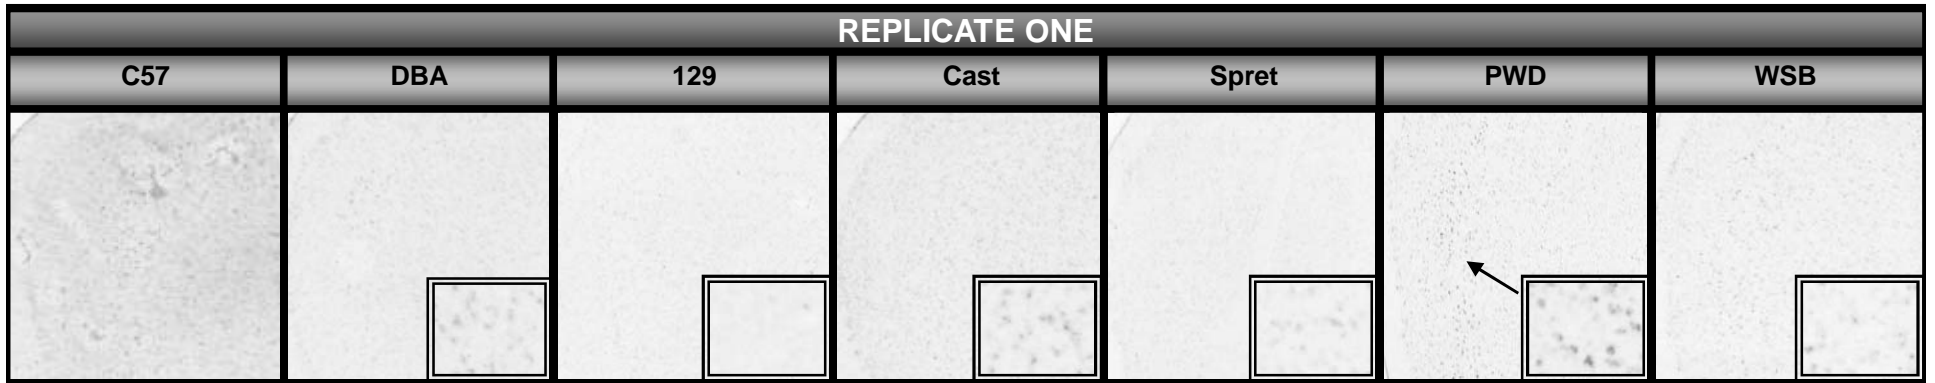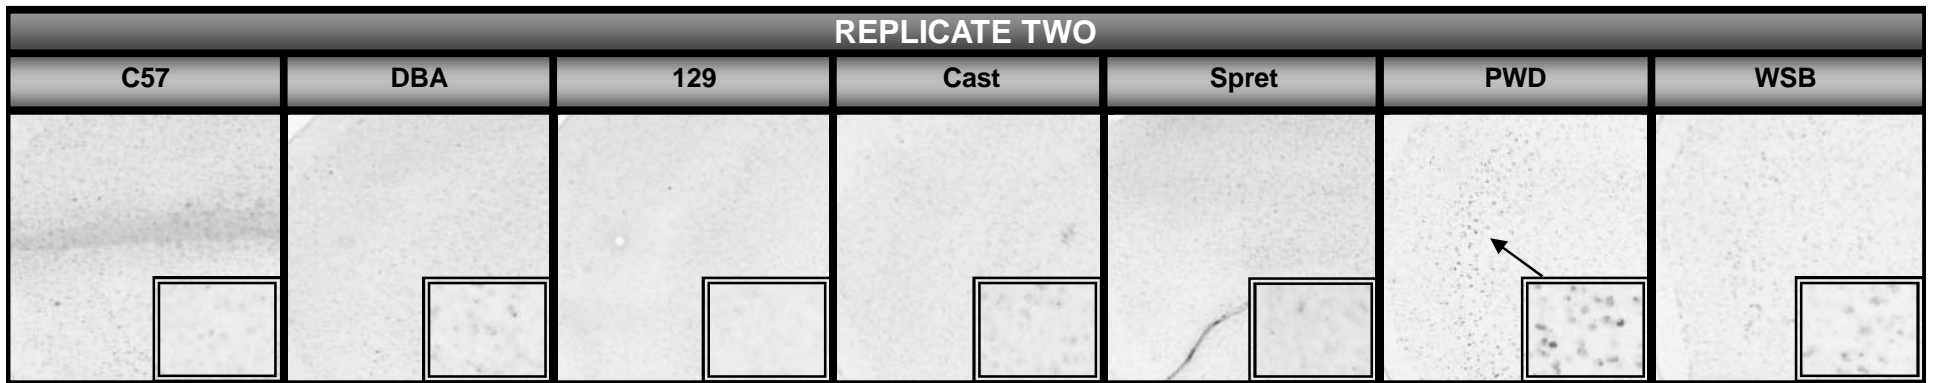

**MO(2/3): ... < PWD**

---

*The PWD strain shows greater density and intensity of monamine oxidase B (Maob) expression in the deep portion of layer 2/3 of anterior, ventral motor cortex*



**Maob**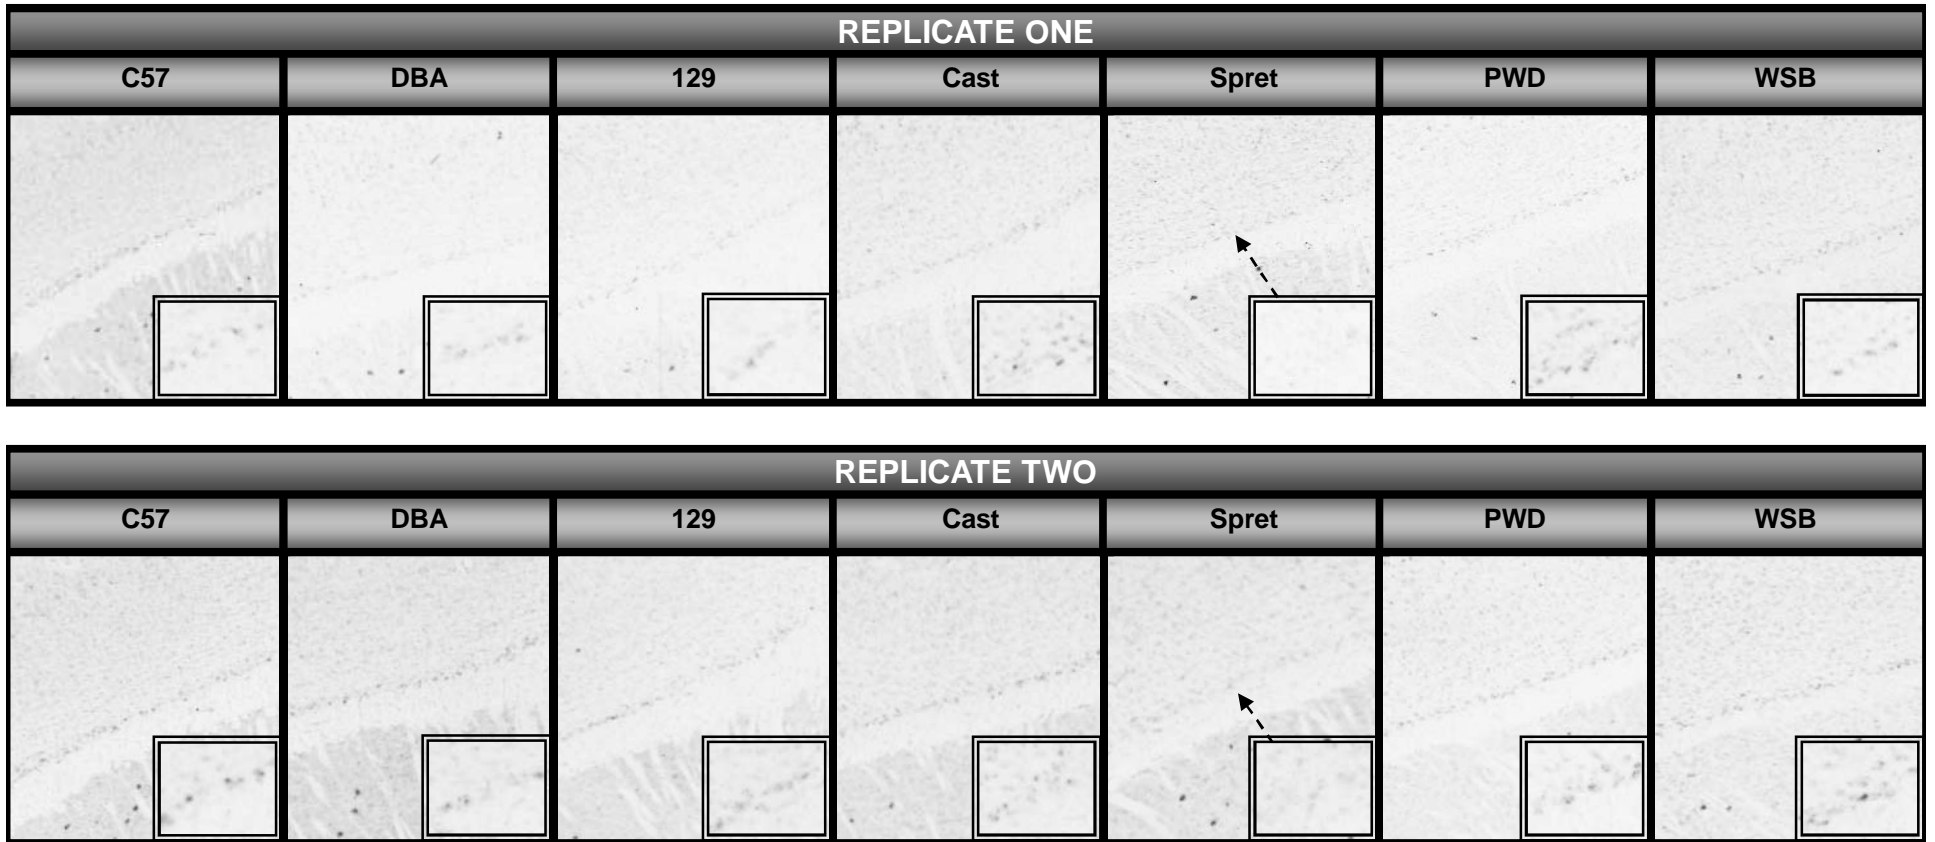

**CTX(6b): Spret < ...**

---

*The Spret strain shows lower density and intensity of monamine oxidase B (Maob) expression in the cortical subplate, layer 6b*

**Maob**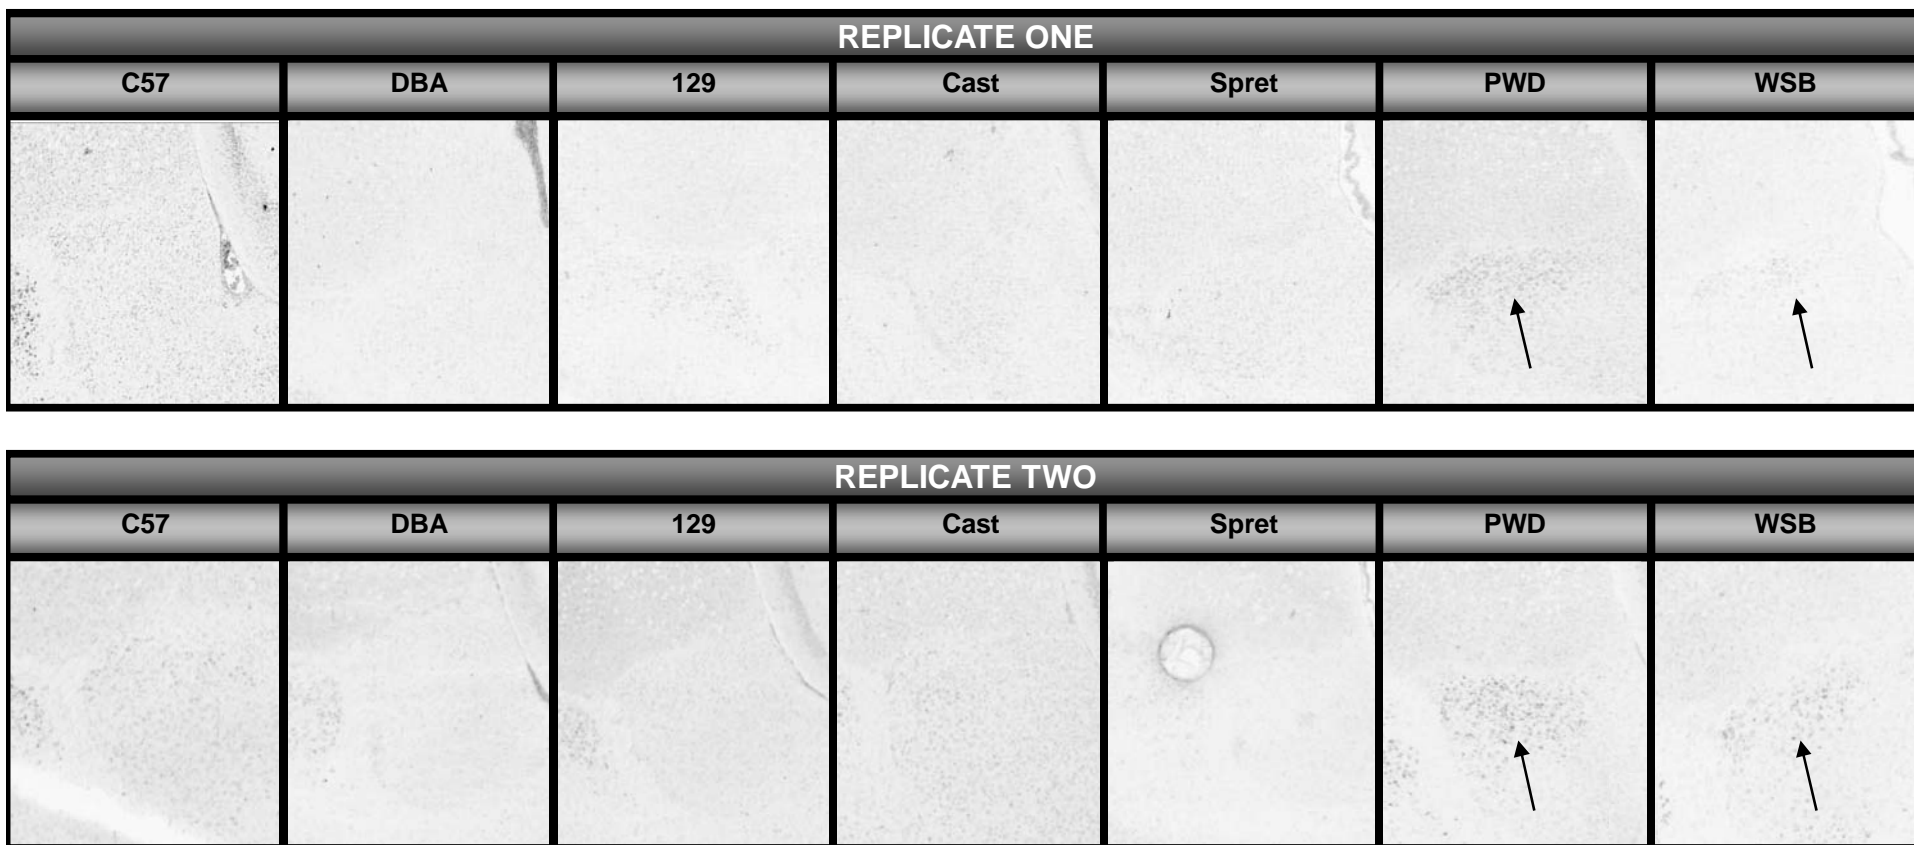

**LA: ... < PWD, WSB**

---

*The PWD and WSB strains show greater density and intensity of monamine oxidase B (Maob) expression in the lateral amygdalar nucleus*

**Maob**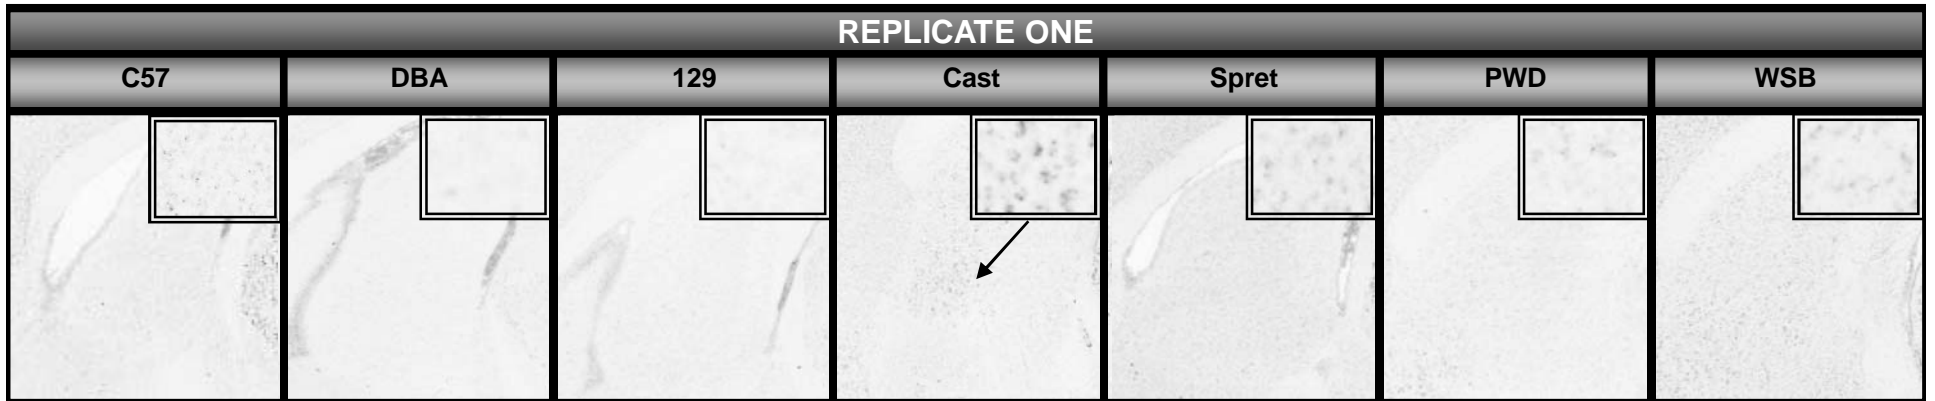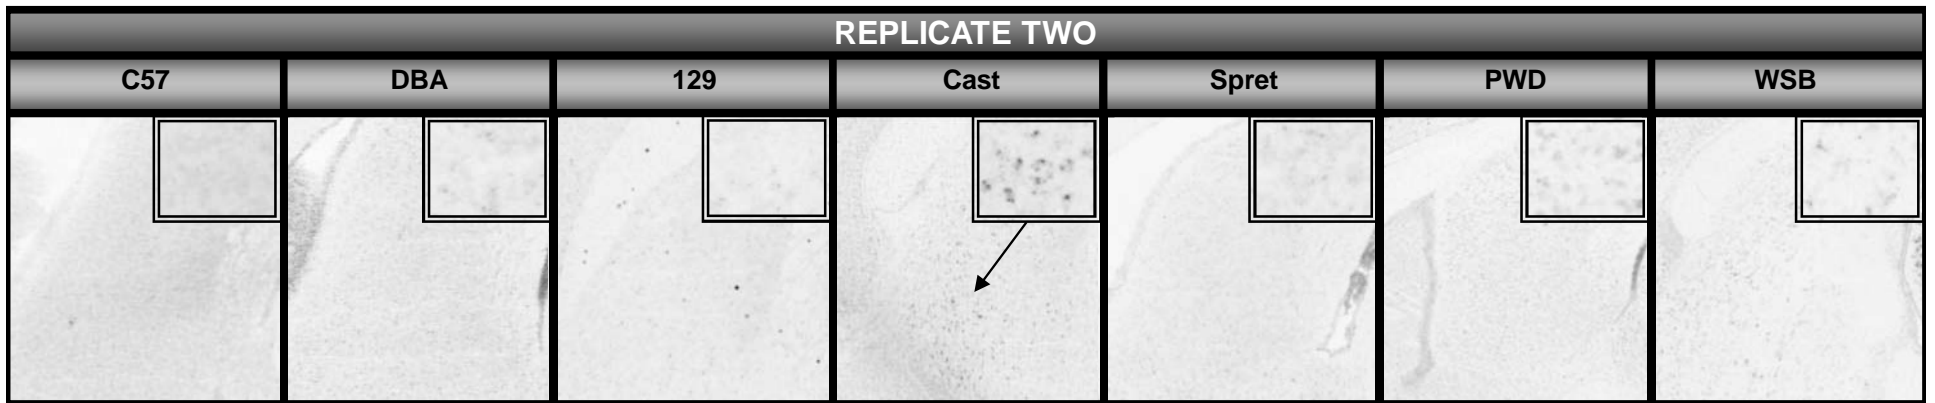

LSr: ... < Cast

*The Cast strain shows greater density and intensity of monamine oxidase B (Maob) expression in the lateral septal nucleus, rostral part*

**Maob**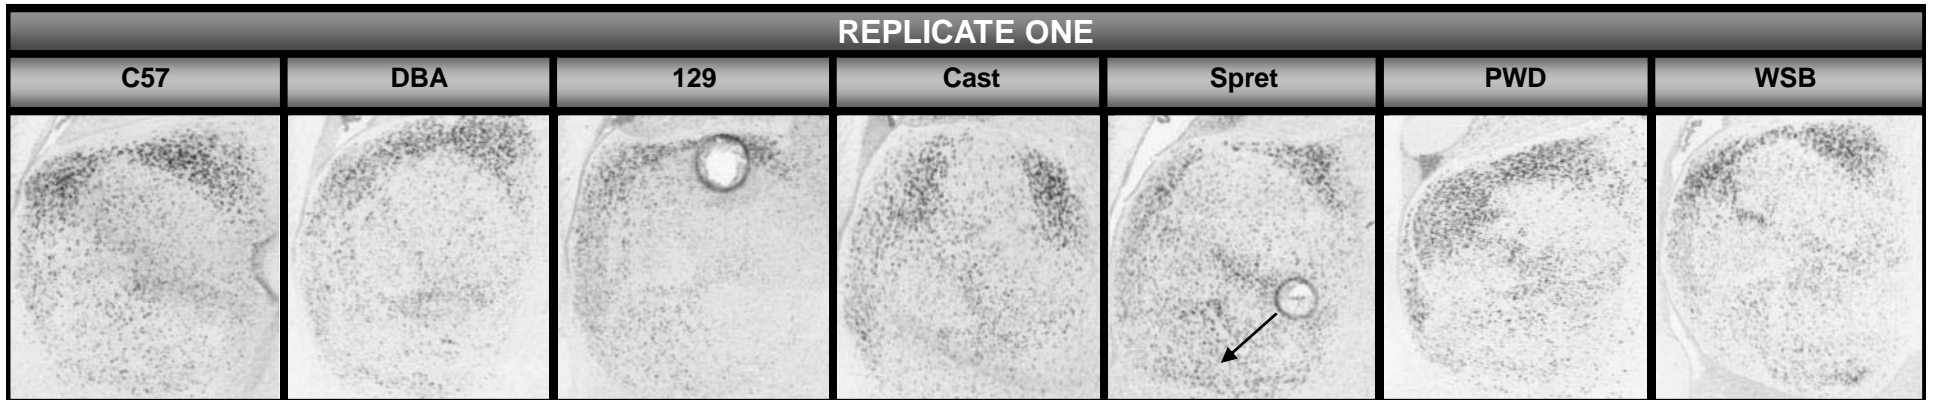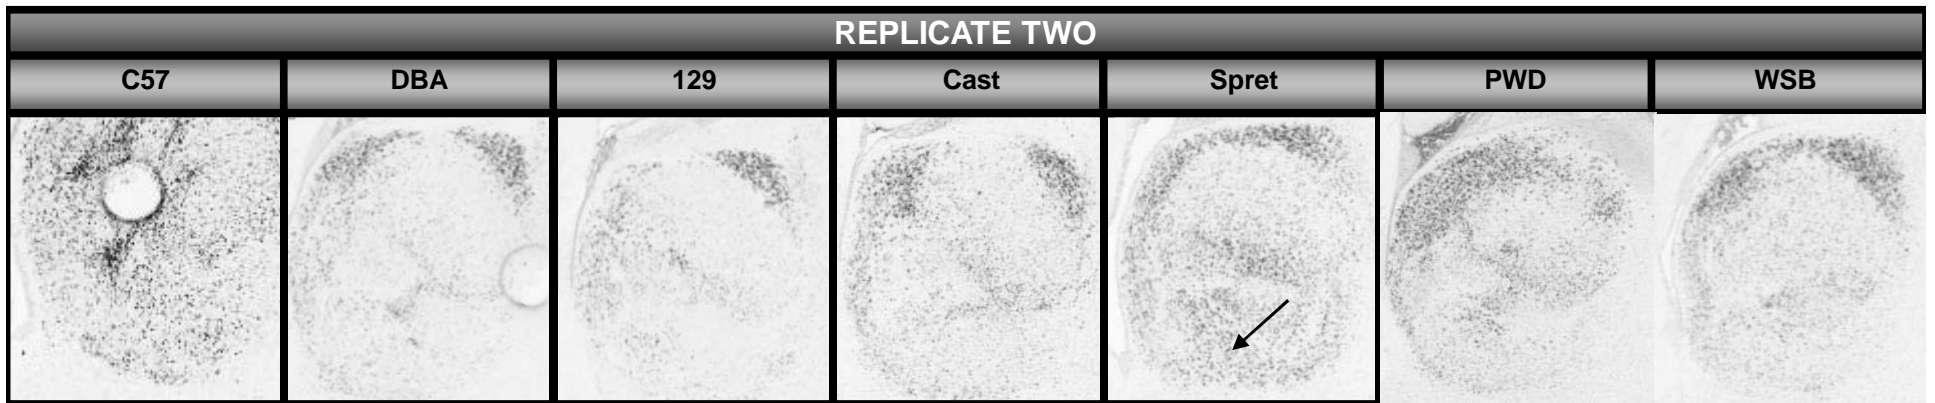

RE: ... < Spret

---

*The Spret strain shows greater density and intensity of monamine oxidase B (Maob) expression in the thalamic nucleus of reunions*

**Oprm1**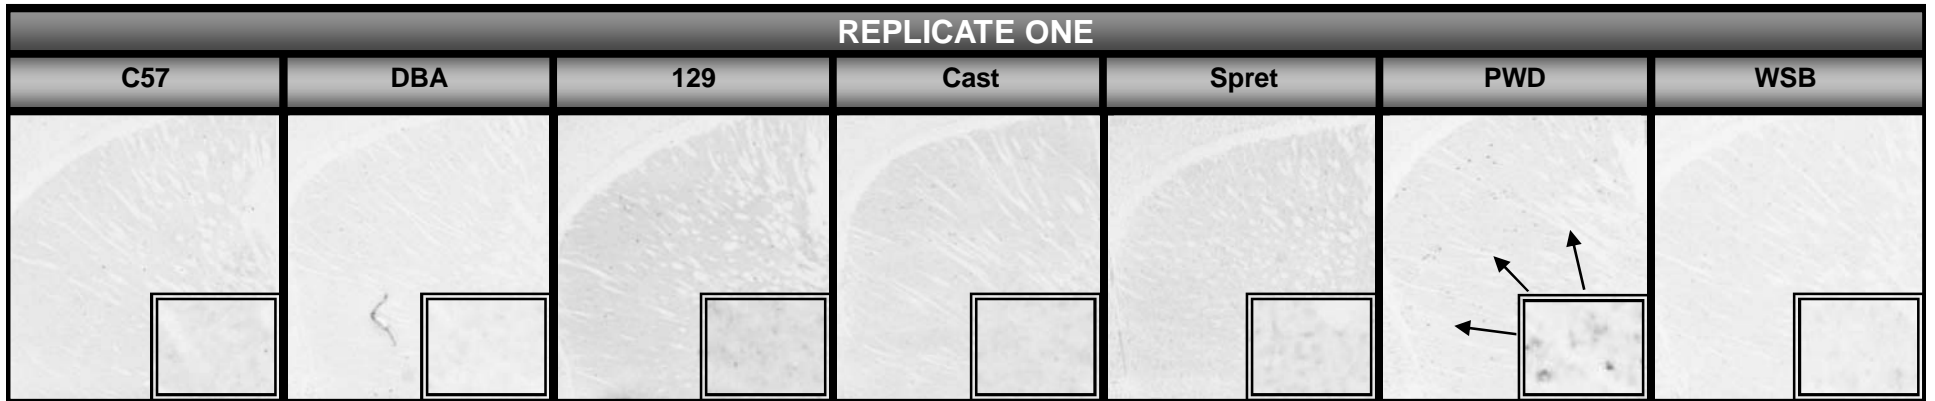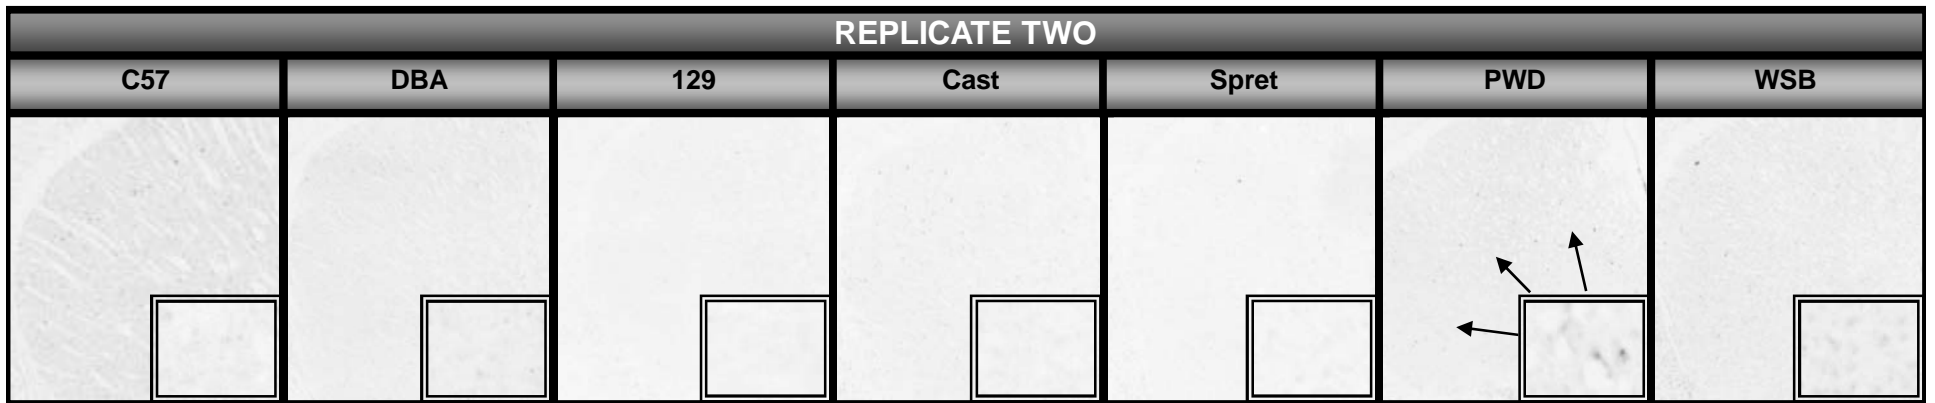**CP: ... < PWD**

*The PWD strain shows greater density and intensity of opioid receptor, mu 1 (Oprm1) expression in the caudate putamen*

**Oprm1**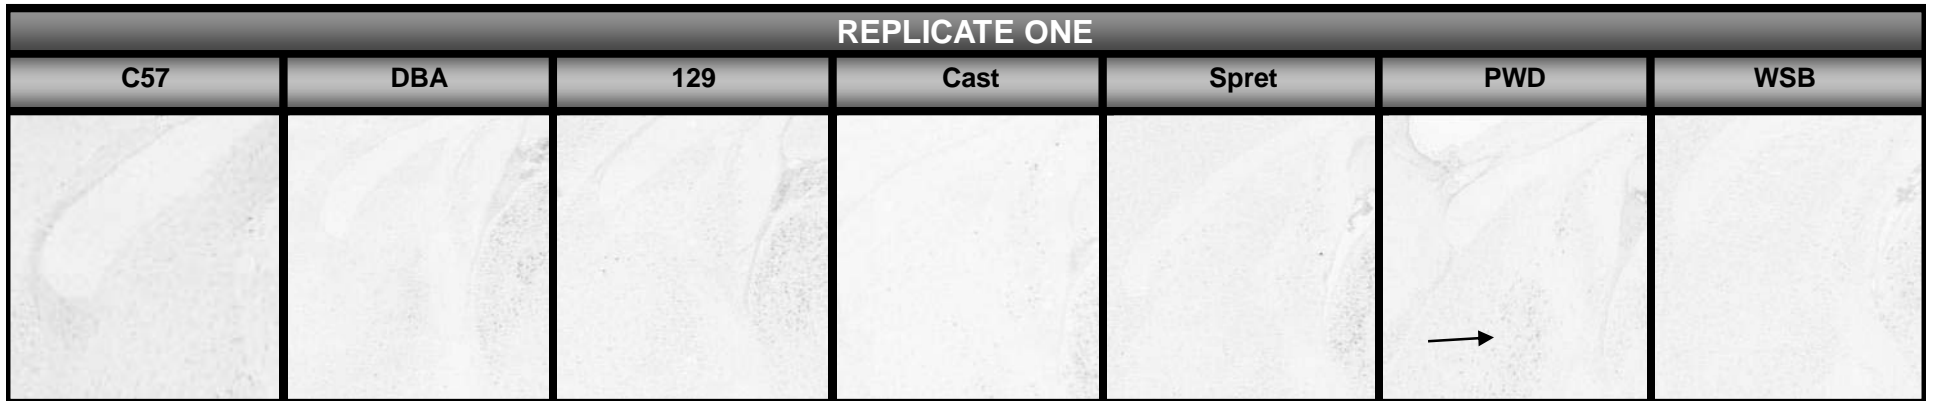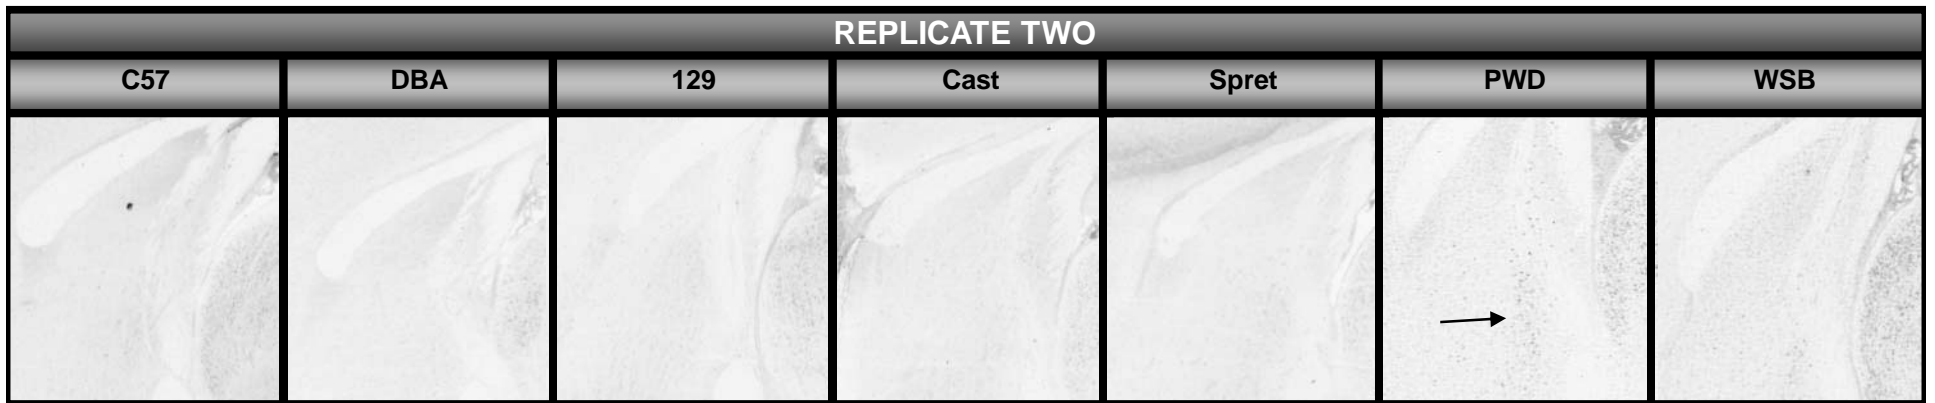**MS: ... < PWD**

*The PWD strain shows greater density and intensity of opioid receptor, mu 1 (Oprm1) expression in the medial septal nucleus*

62a,b

## Oprm1

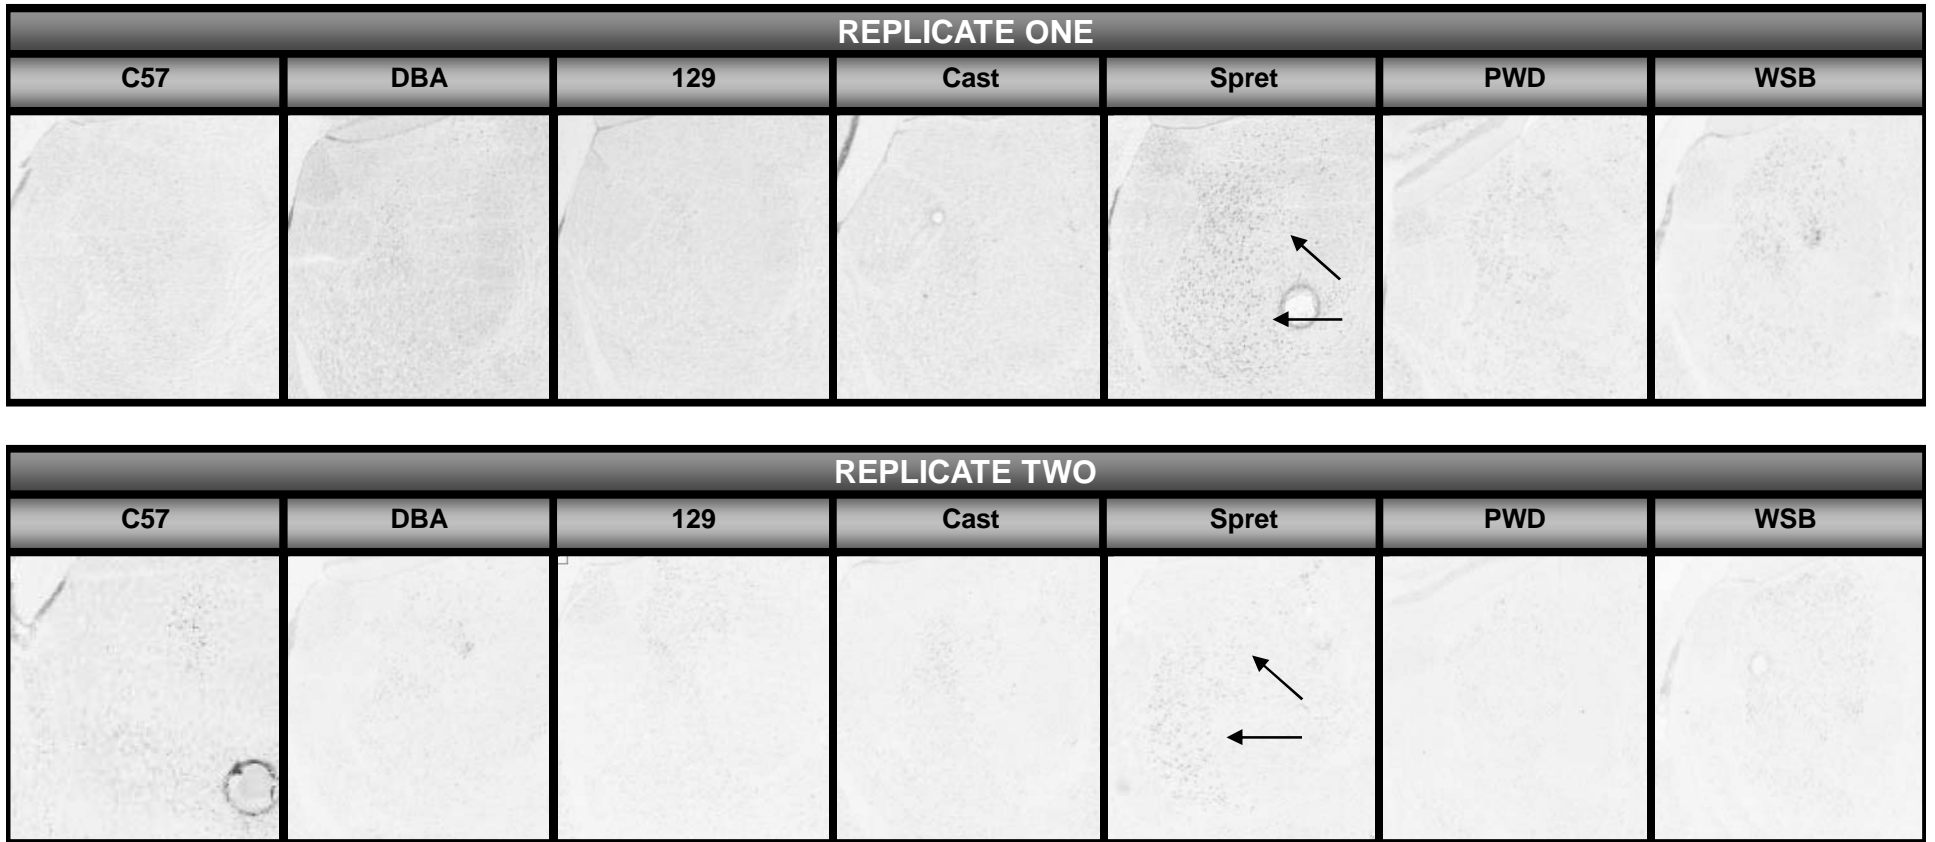

VAL, VPL: ... < Spret

---

*The Spret strain shows greater density and intensity of opioid receptor, mu 1 (Oprm1) expression in the ventral anterolateral complex and ventral posterolateral nuclei of the thalamus*

## Pdgfrb

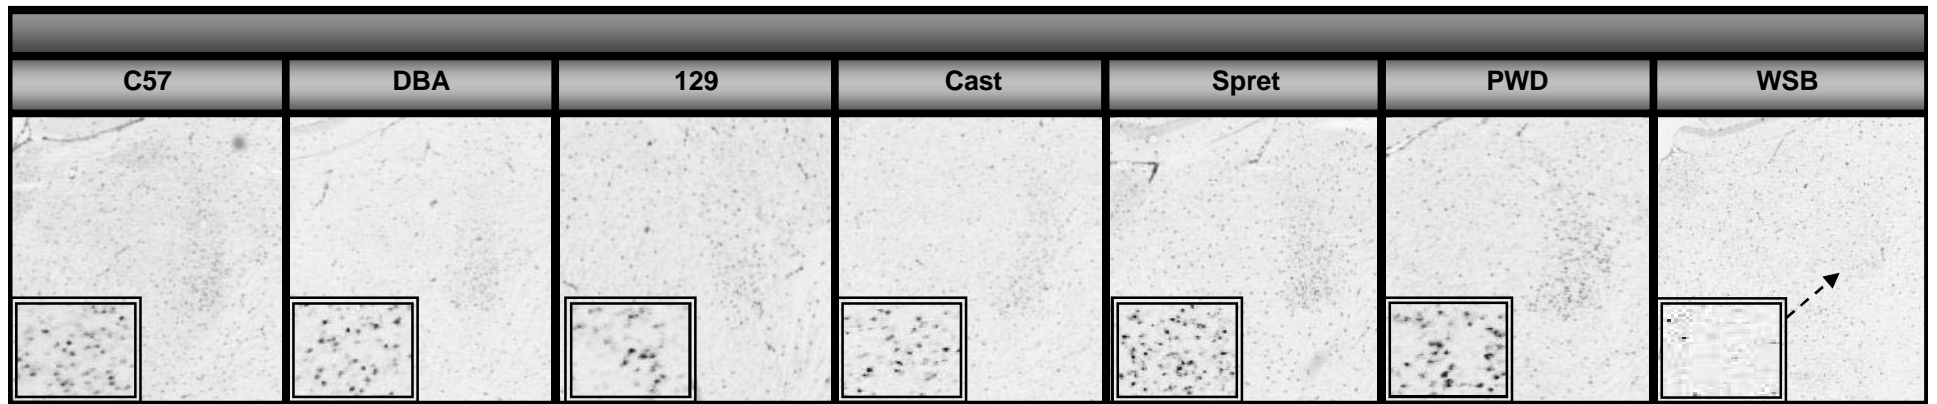

PF: WSB < ...

*The WSB strain shows lower density and intensity of platelet derived growth factor receptor, beta polypeptide (Pdgfrb) in the parafascicular nucleus*



**Ppp3ca**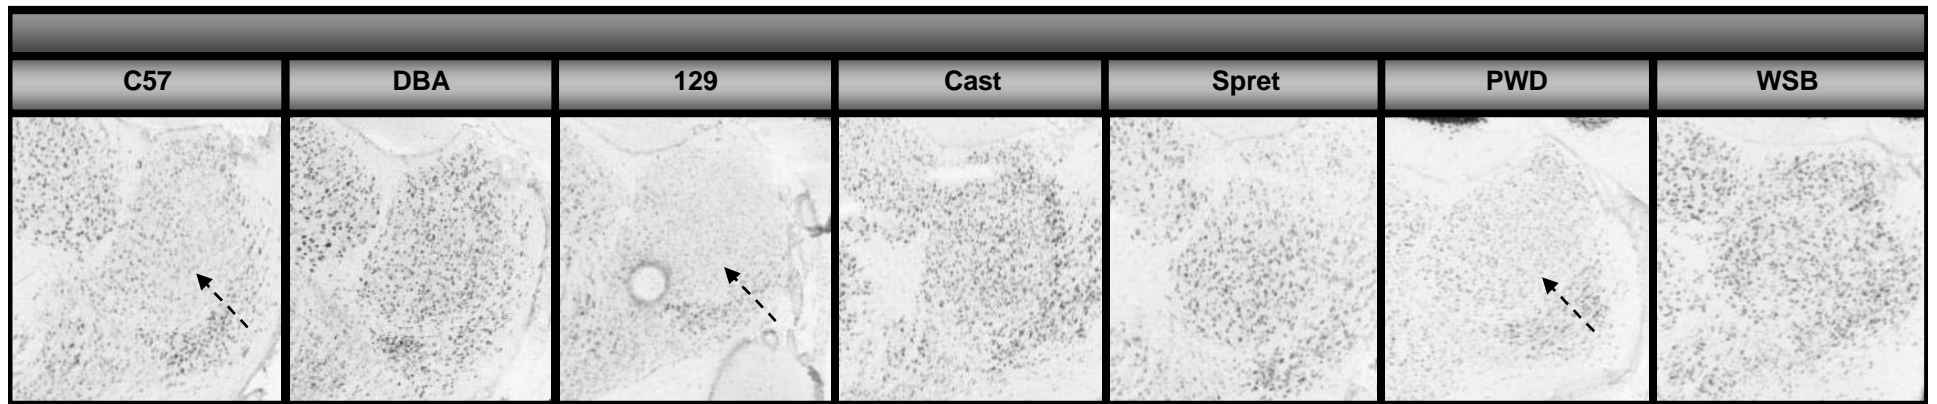

**MG: C57, 129, PWD < ...**

*The C57, 129 and PWD strains show lower density and intensity of protein phosphatase 3, catalytic subunit, alpha isoform (Ppp3ca) in the medial geniculate complex*

**Ptgs2**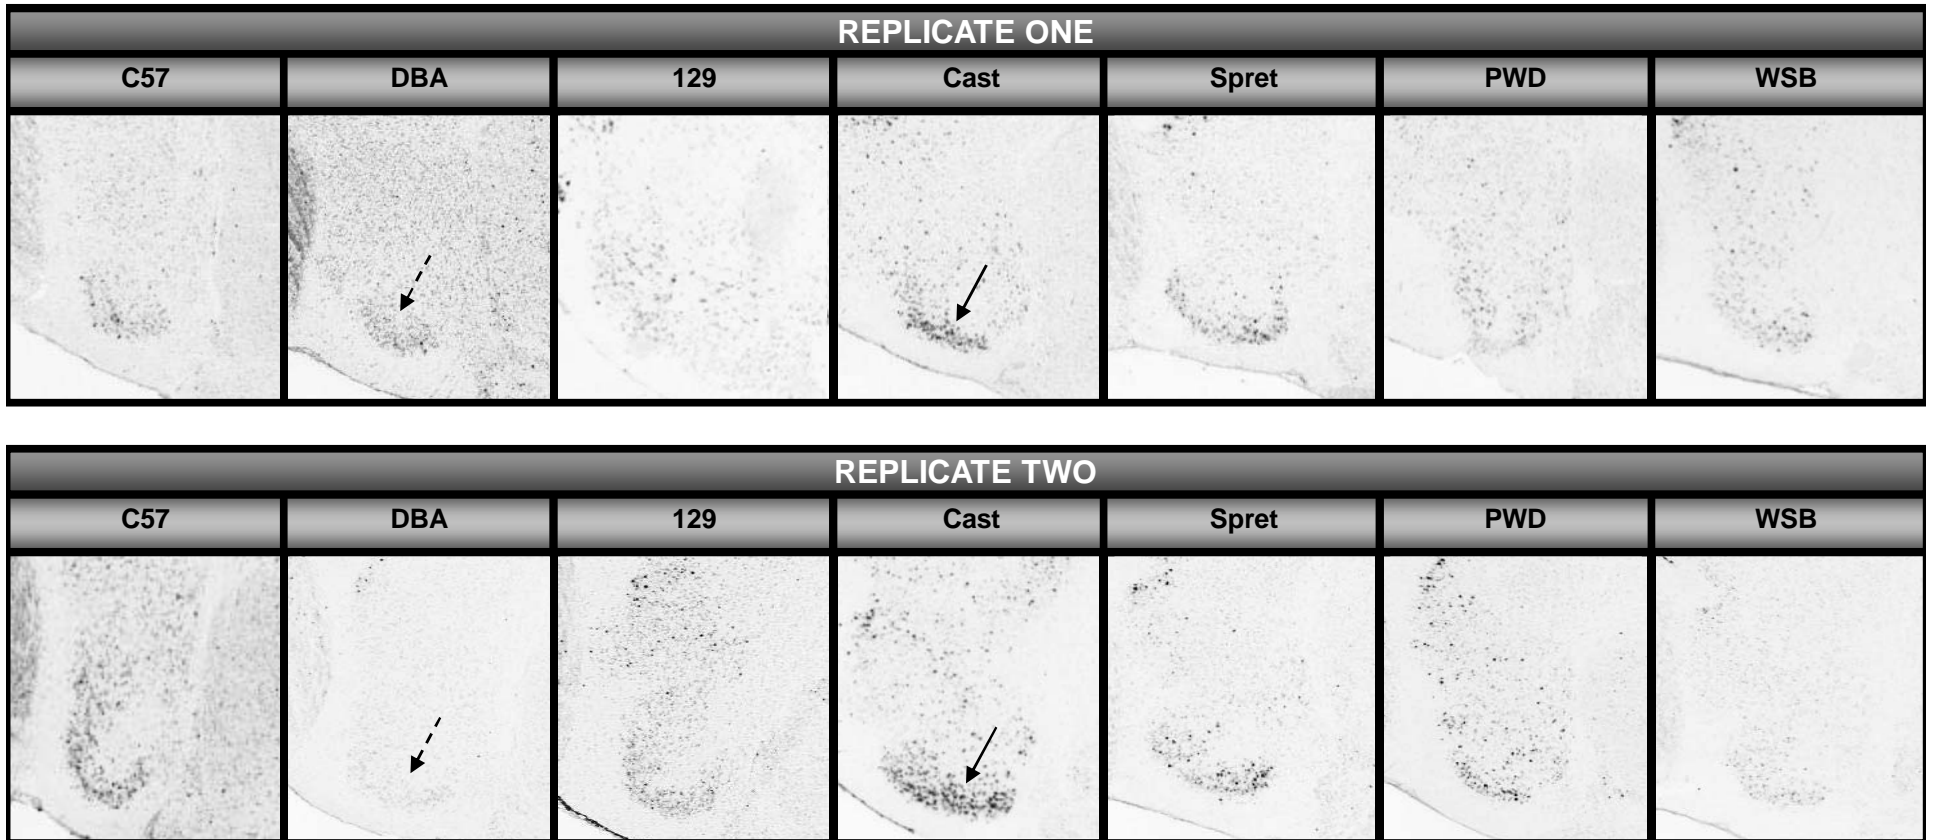

**TTv: DBA < ... < Cast**

*The DBA strain shows lower density and intensity of prostaglandin-endoperoxide synthase 2 (Ptgs2) expression in the taenia tecta, ventral part; the Cast strain shows greater*

**Ptgs2**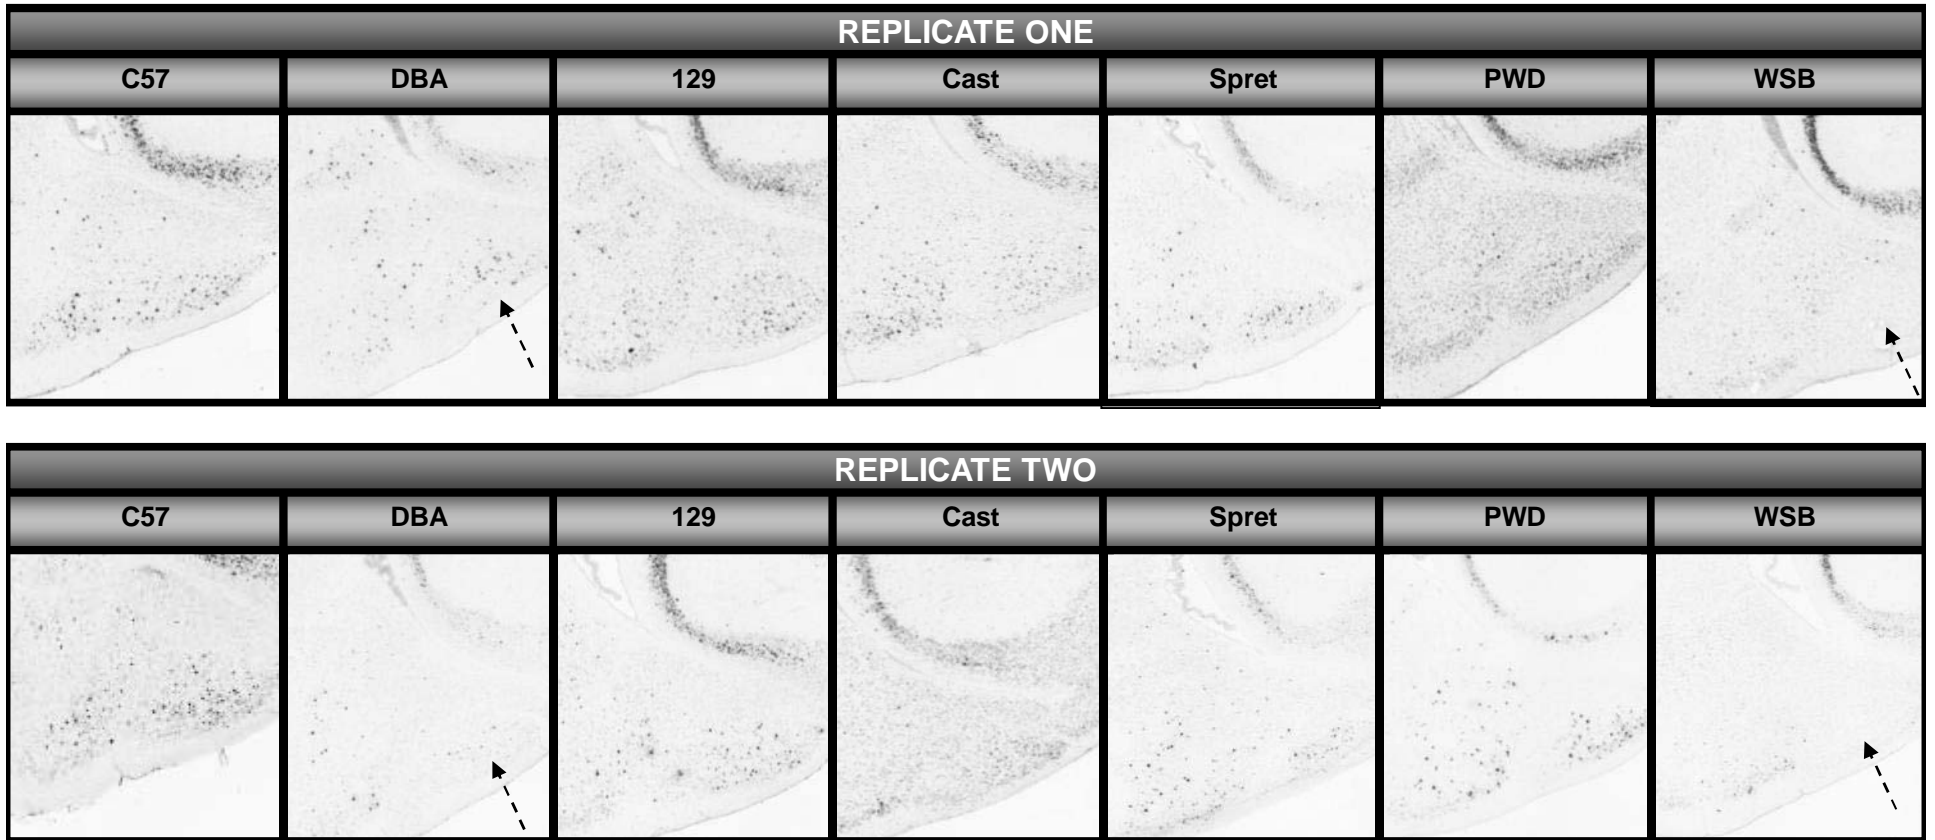

**COA: DBA, WSB < ...**

*The DBA and WSB strains show lower density of prostaglandin-endoperoxide synthase 2 (Ptgs2) expression in the cortical amygdalar area*

67a,b

## Ptgs2

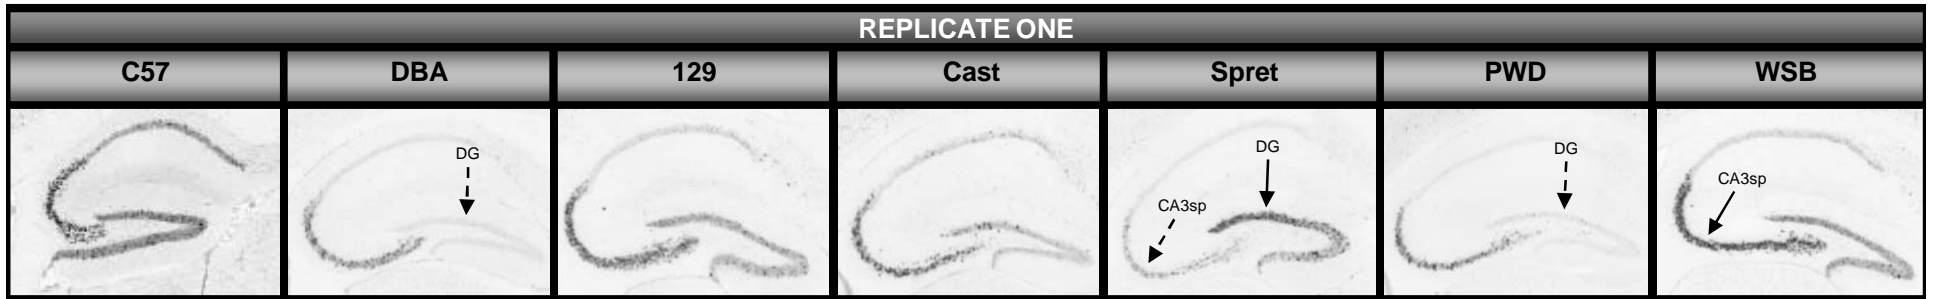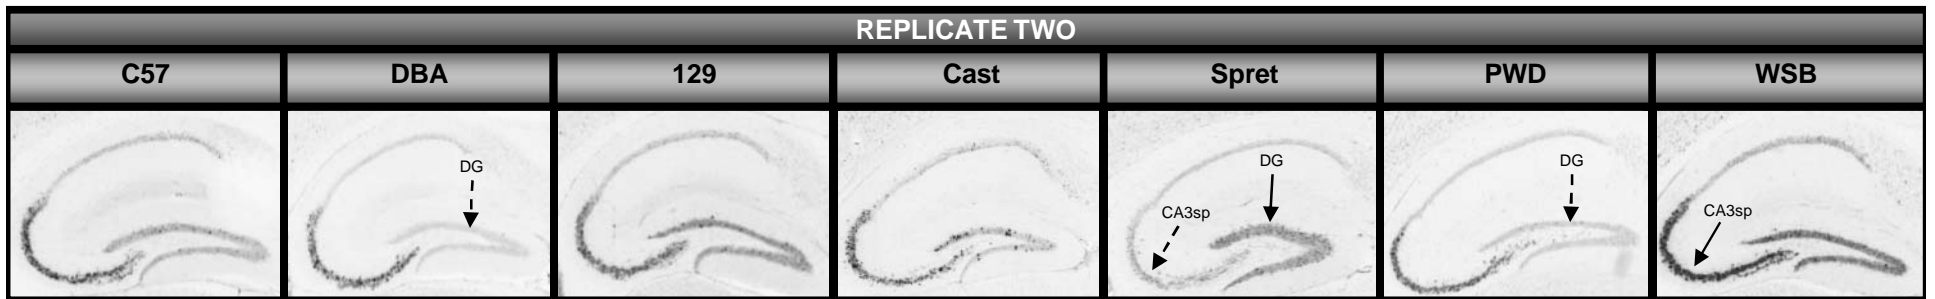

**CA3sp: Spret < ... < WSB**  
**DG: DBA, PWD < ... < Spret**

*The Spret strain shows lower density and intensity of prostaglandin-endoperoxide synthase 2 (Ptgs2) expression in the cornu ammonis field 3, pyramidal layer, while the WSB strain shows greater; DBA and PWD strains show lower density and intensity of expression in the dentate gyrus, while the Spret strain shows greater*

**Ptgs2**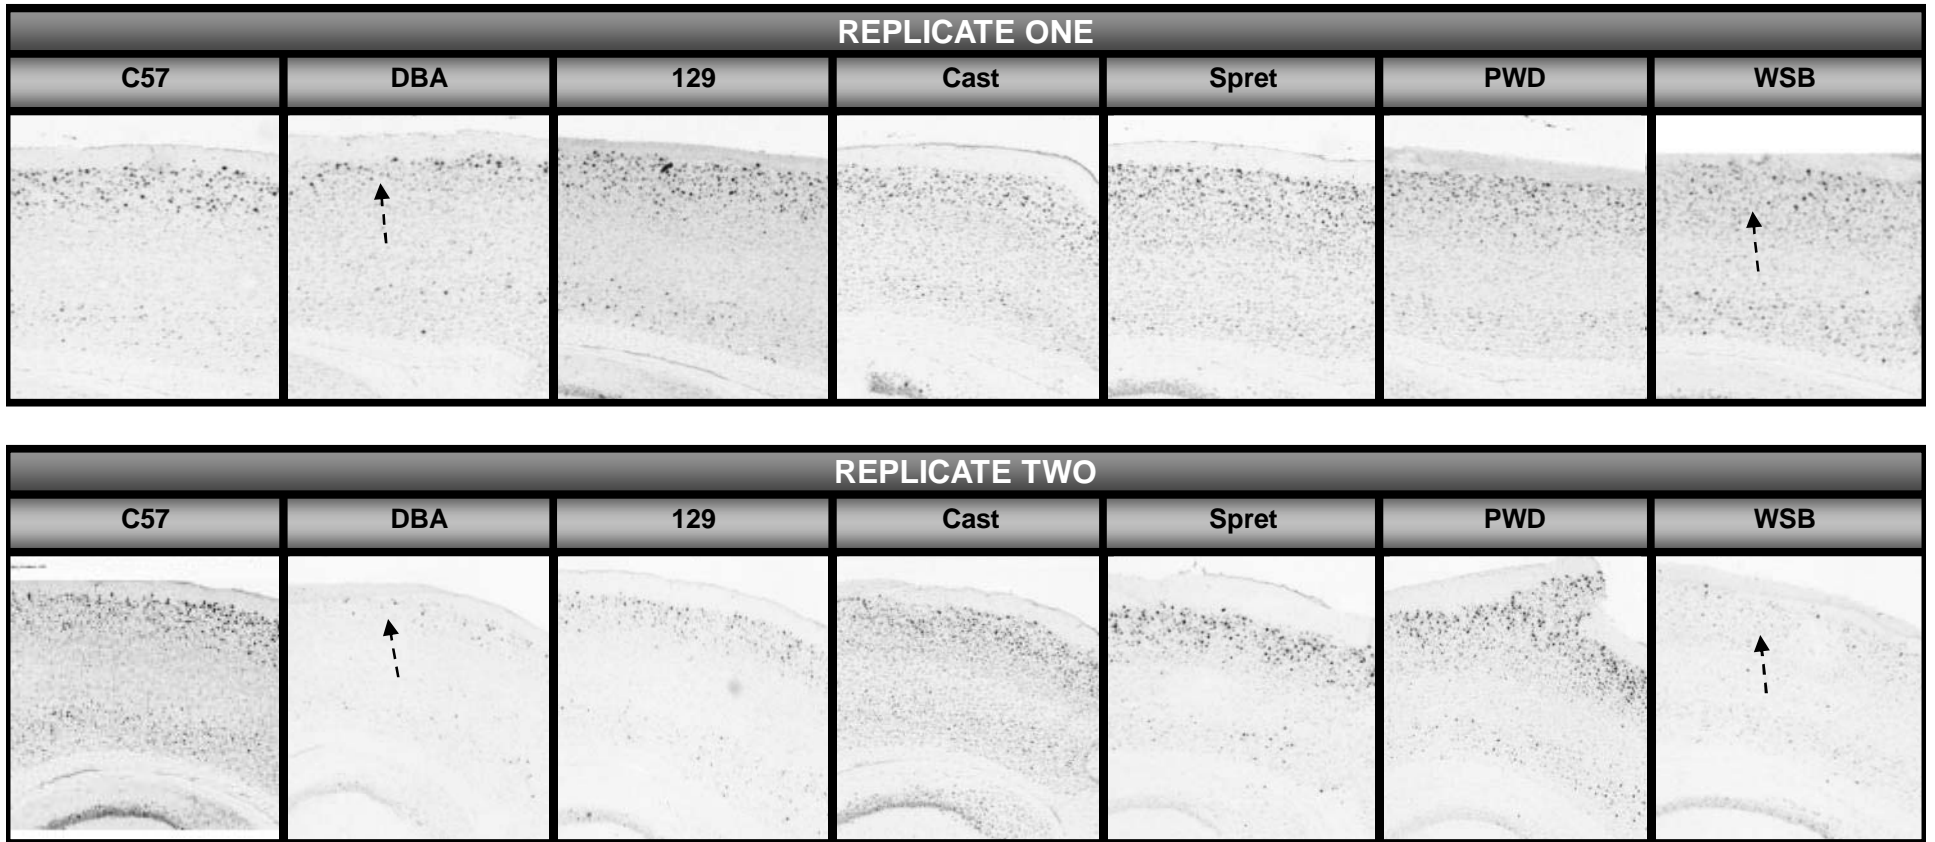

**VIS(2/3): DBA, WSB < ...**

*The DBA and WSB strains show lower density of prostaglandin-endoperoxide synthase 2 (Ptgs2) expression in the superficial portion of layer 2/3 of the visual cortex*

**Ptgs2**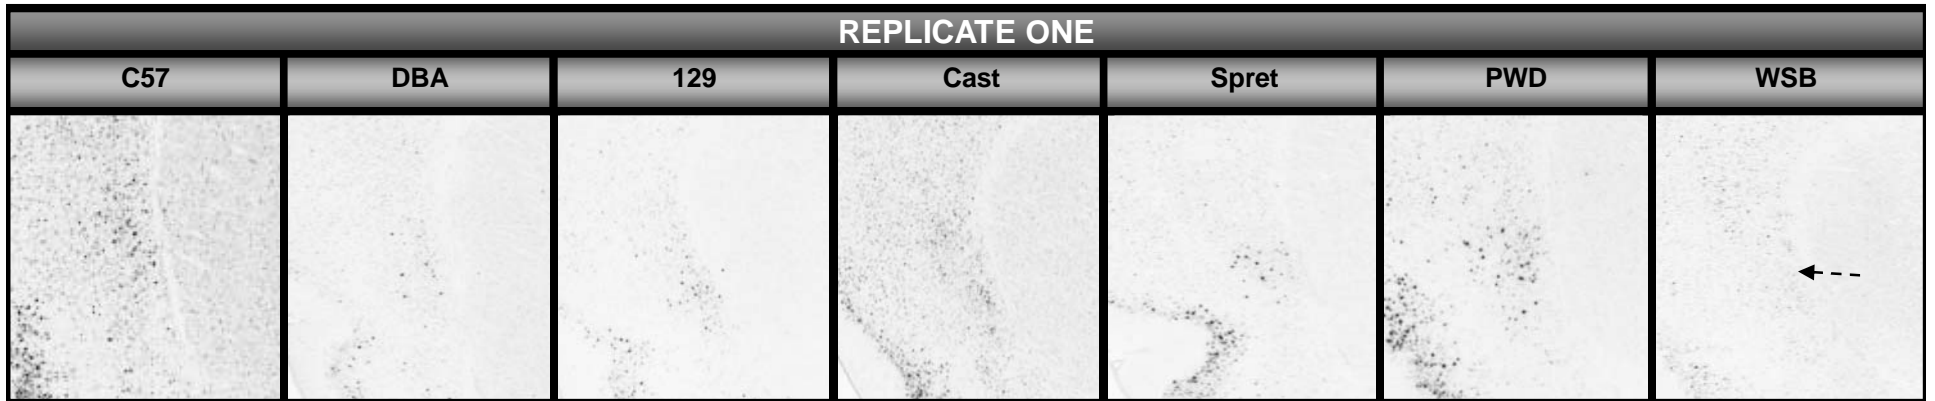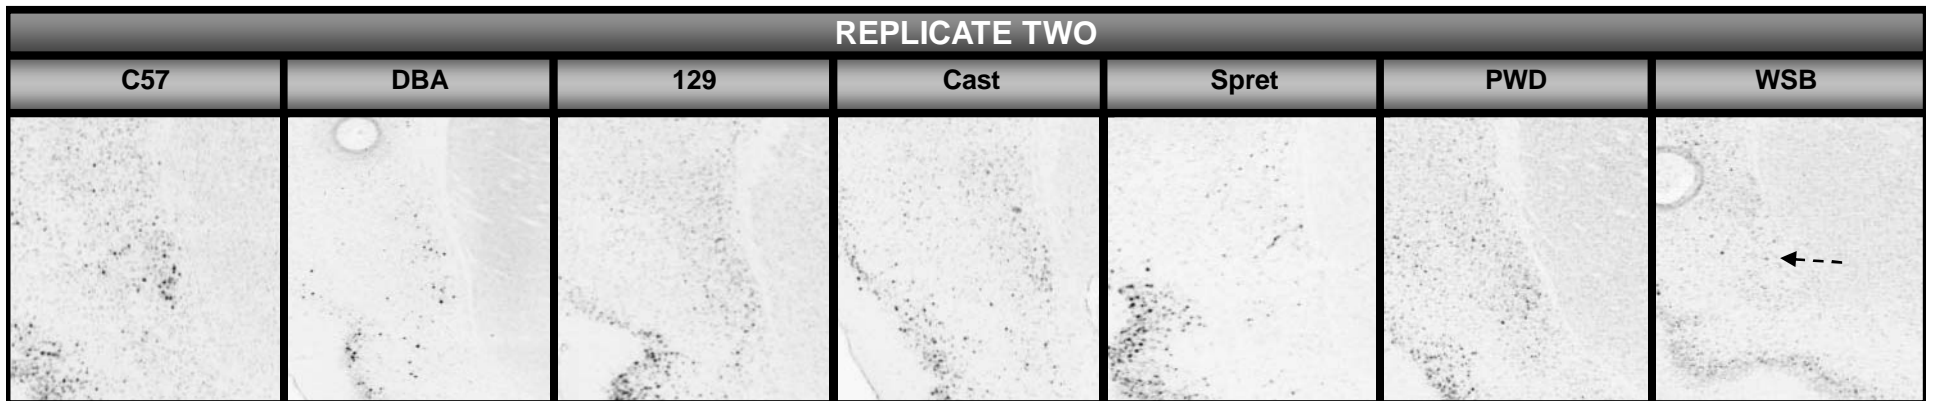

**CLA: WSB < ...**

---

*The WSB strain shows lower density and intensity of prostaglandin-endoperoxide synthase 2 (Ptgs2) expression in the claustrum*

**Ptgs2**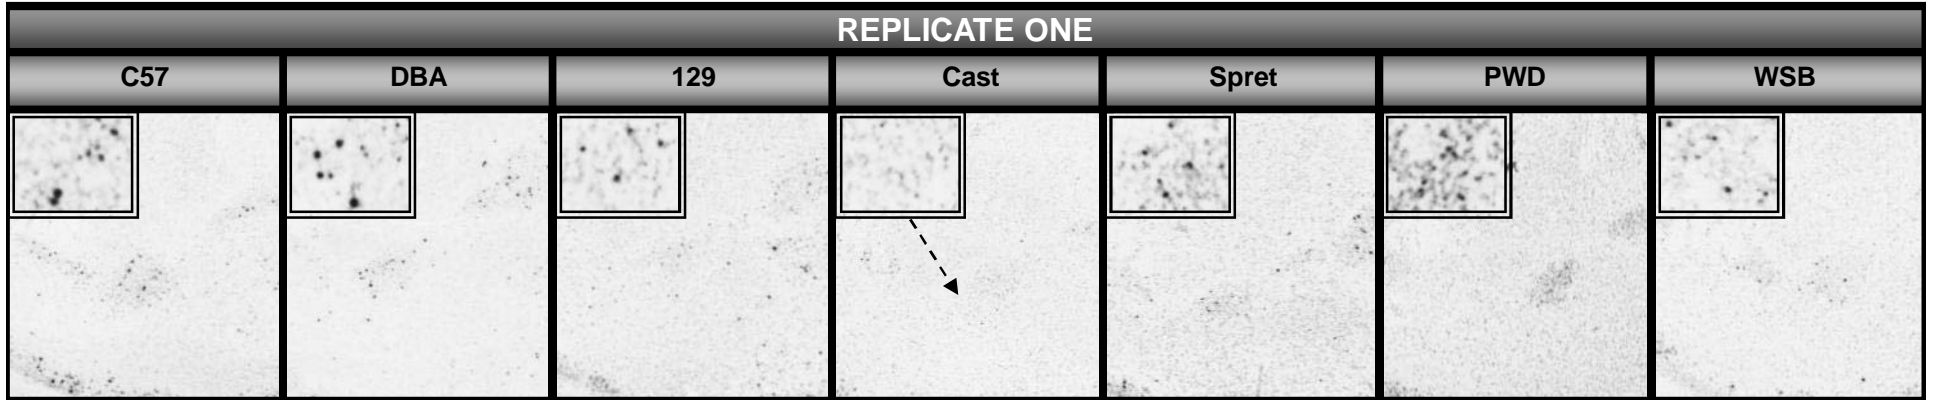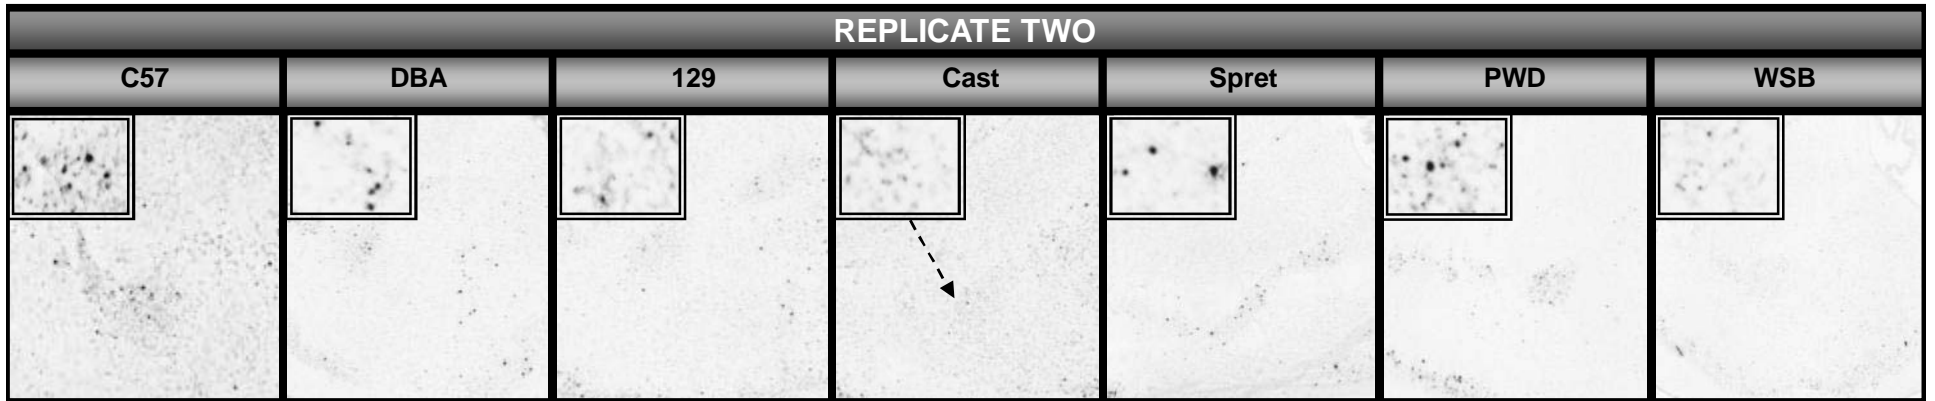**IA: Cast < ...**

*The Cast strain shows lower density of prostaglandin-endoperoxide synthase 2 (Ptgs2) expression in the intercalated amygdalar nucleus*

**Scn10a**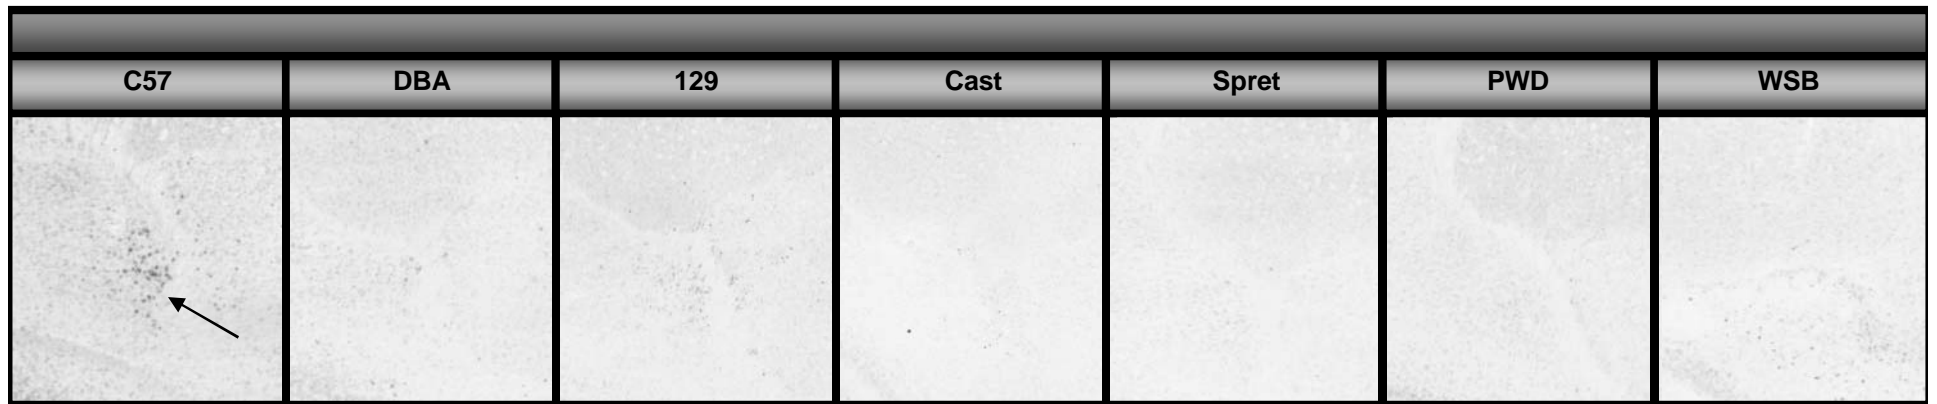**EPd: ... < C57**

*The C57 strain shows greater density and intensity of sodium channel, voltage-gated, type X, alpha (Scn10a) expression in the endopiriform nucleus, dorsal part*



**Scn10a**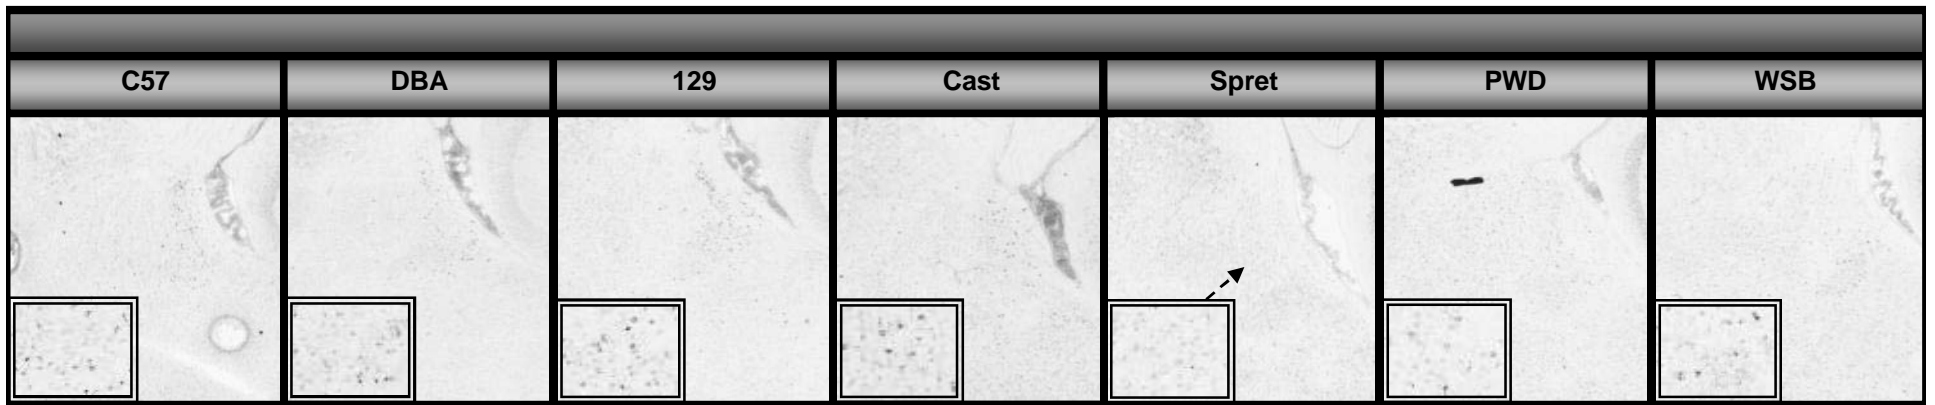

CEA: Spret < ...

*The Spret strain shows lower density of sodium channel, voltage-gated, type X, alpha (Scn10a) expression in the central amygdalar nucleus*

**Slc6a1**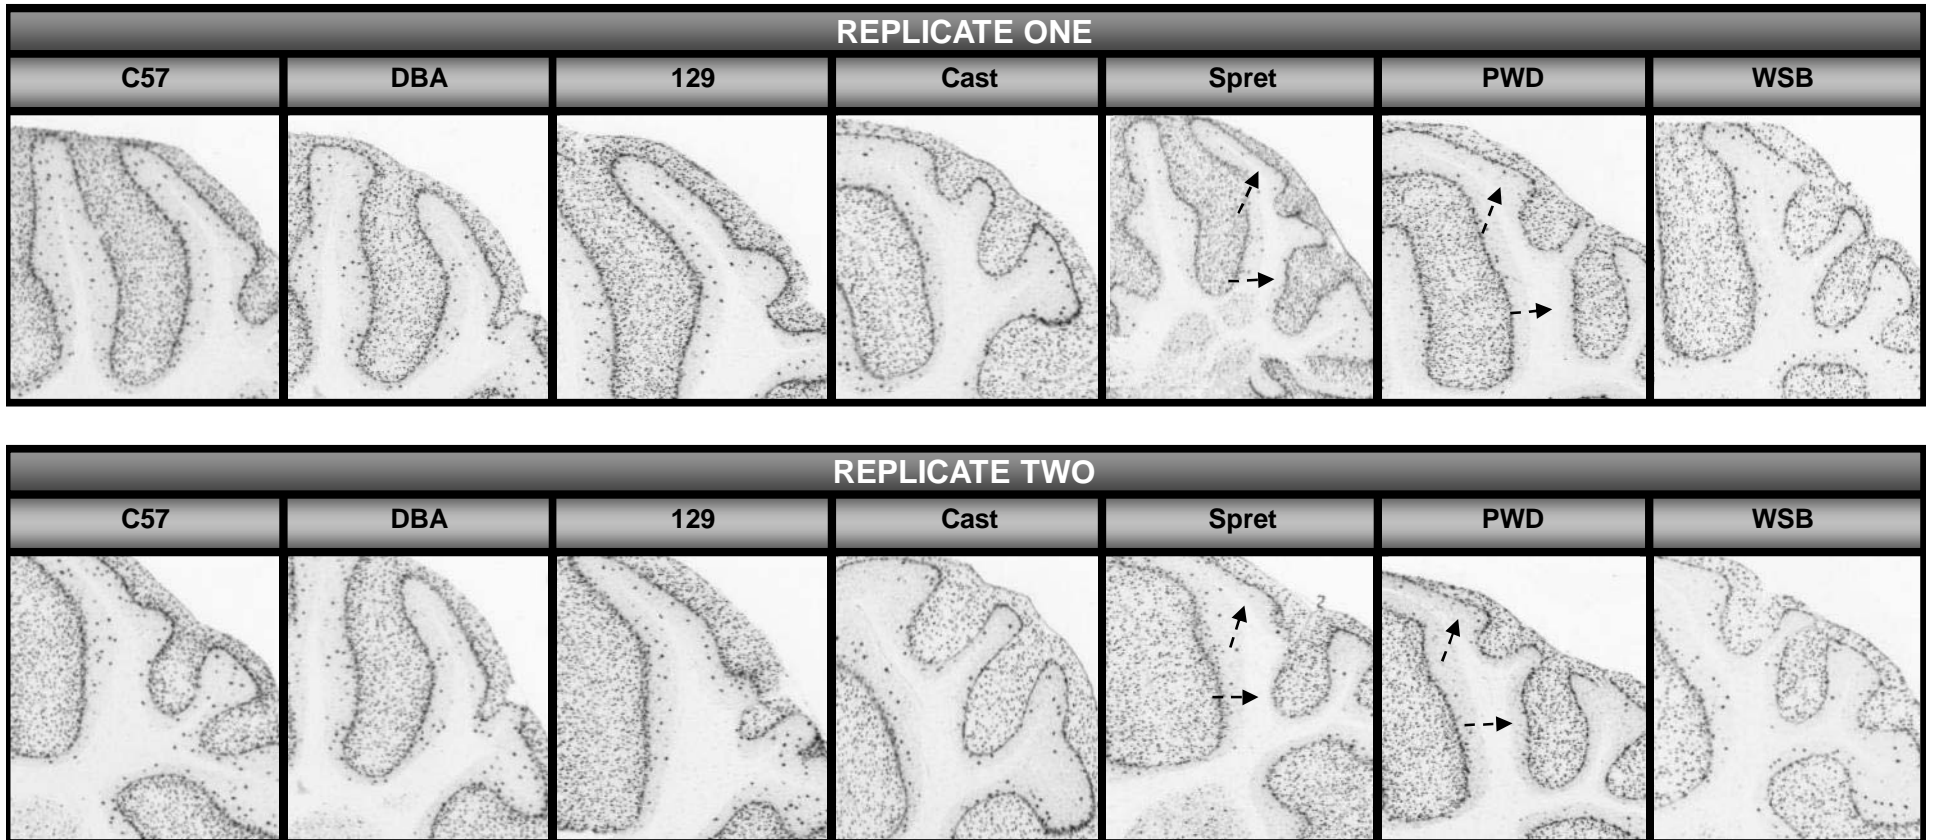

**CBX(mo): Spret, PWD < ...**

*The Spret and PWD strains show lower density of solute carrier family 6, member 1 (Slc6a1) expression in the molecular layer of the cerebellar cortex*

## Th

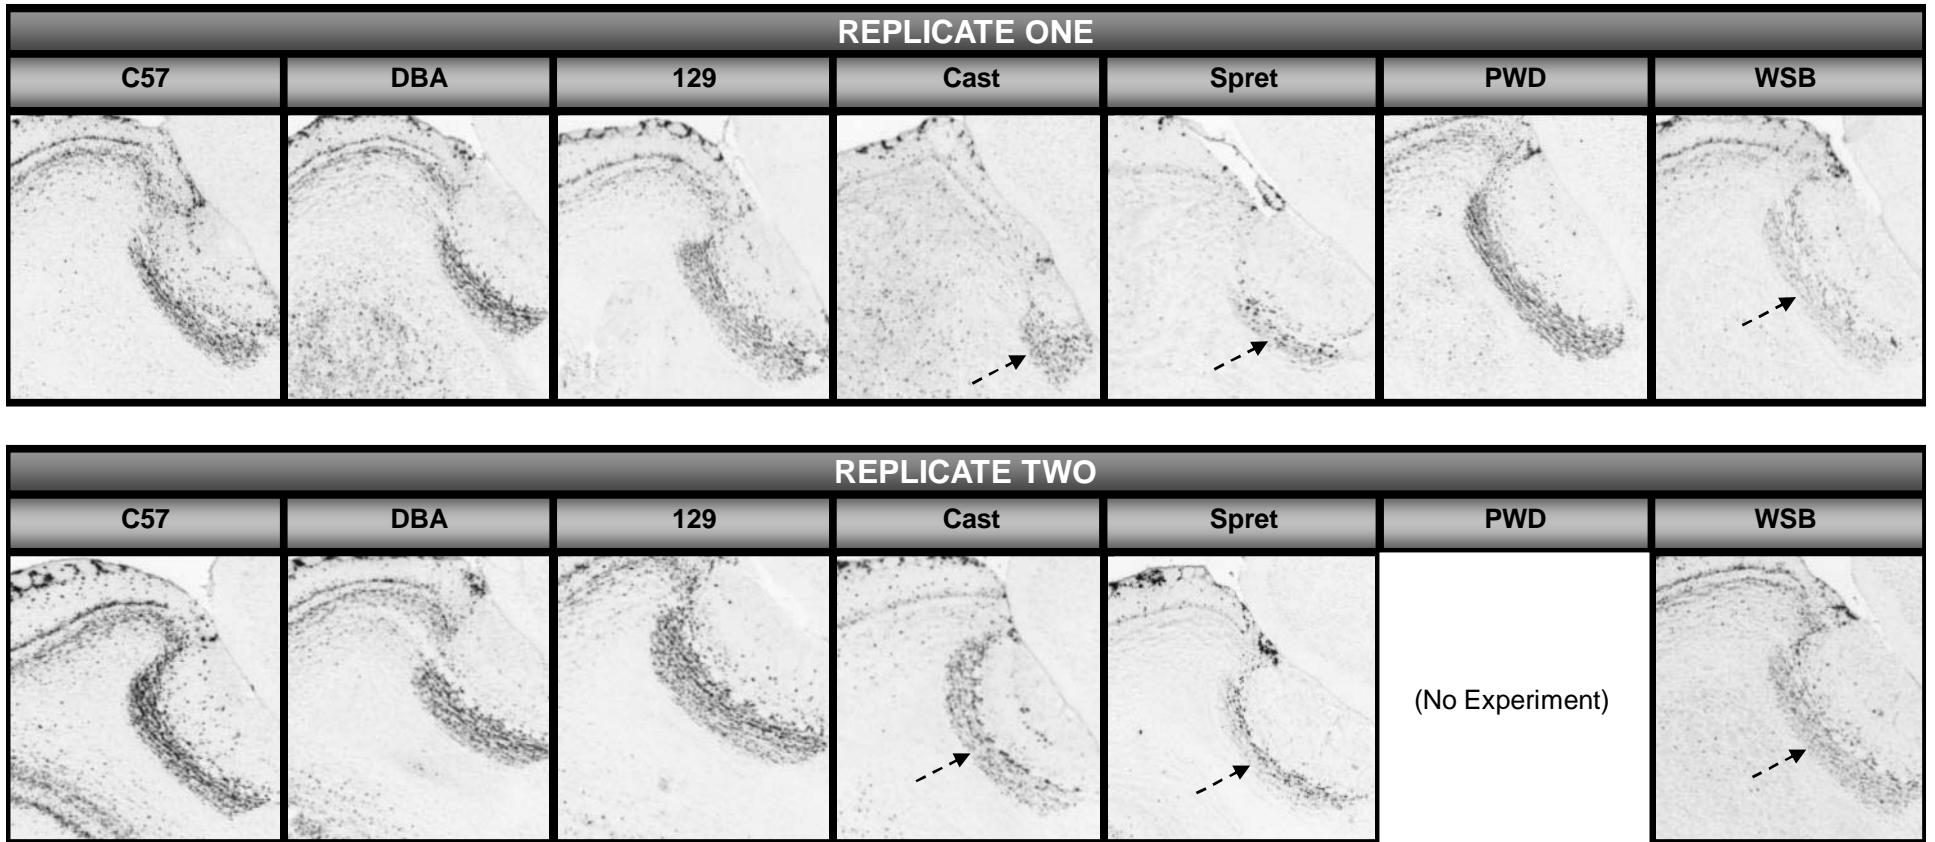

**AOBgr: Cast, Spret, WSB < ...**

*The Cast, Spret and WSB strains show lower density of tyrosine hydroxylase (Th) expression in the accessory olfactory bulb, granule layer*

## Th

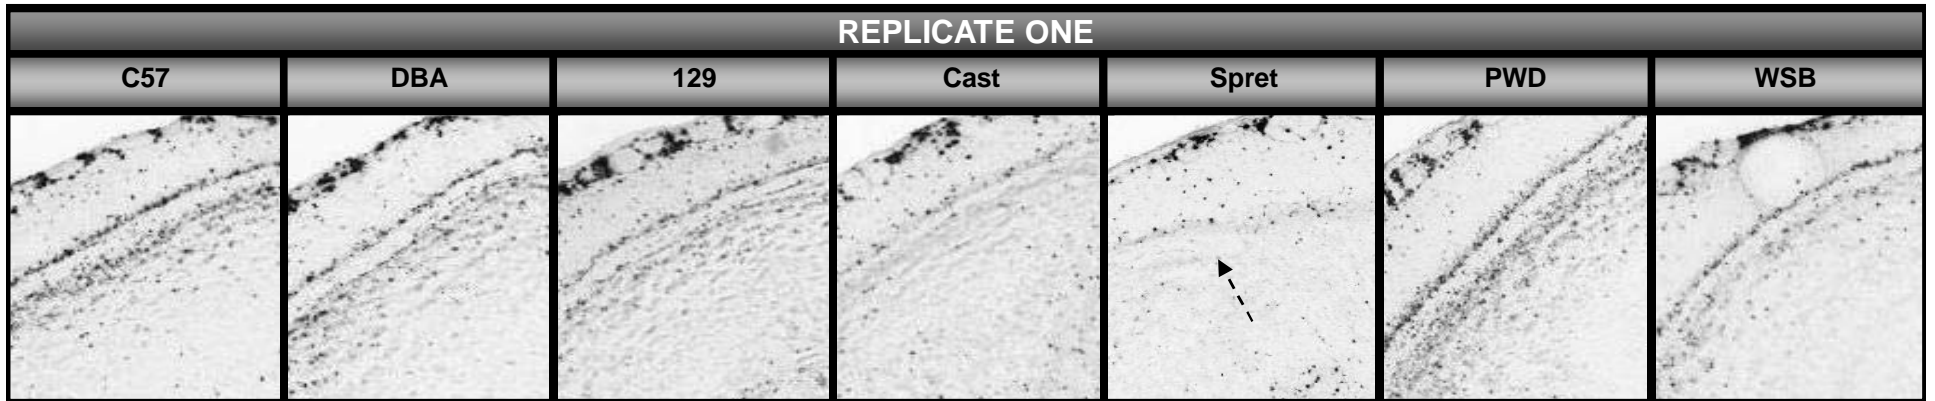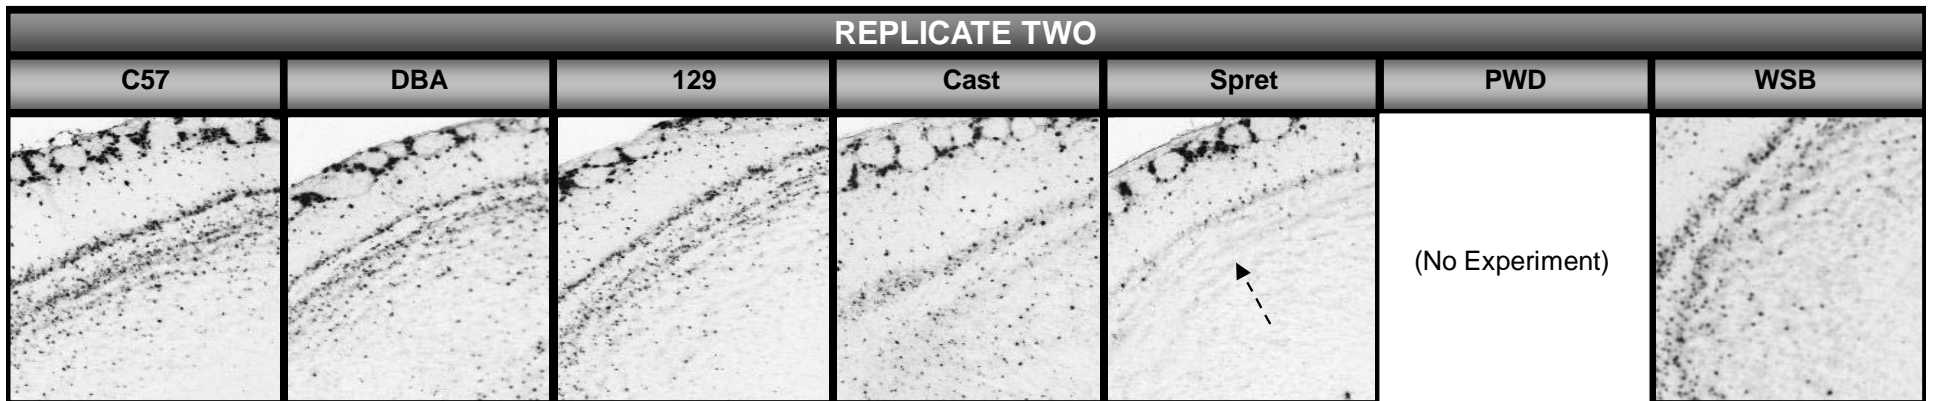

**MOBgr: Spret < ...**

*The Spret strain shows lower density and intensity of tyrosine hydroxylase (Th) expression in the main olfactory bulb, granule layer*

## Th

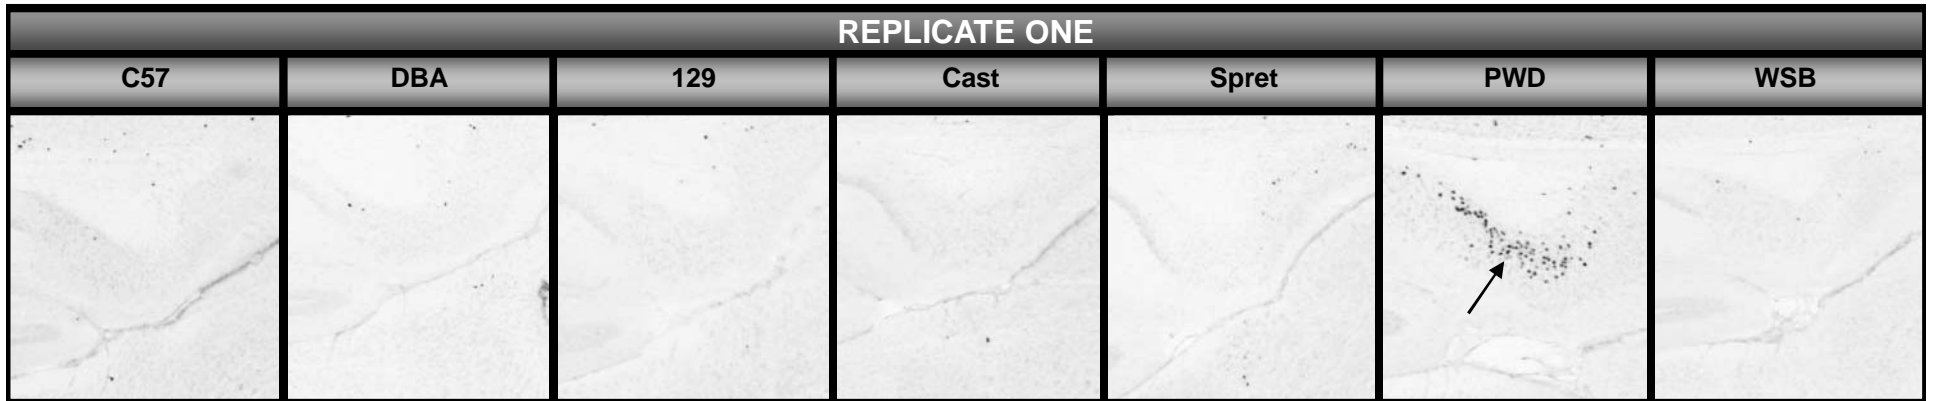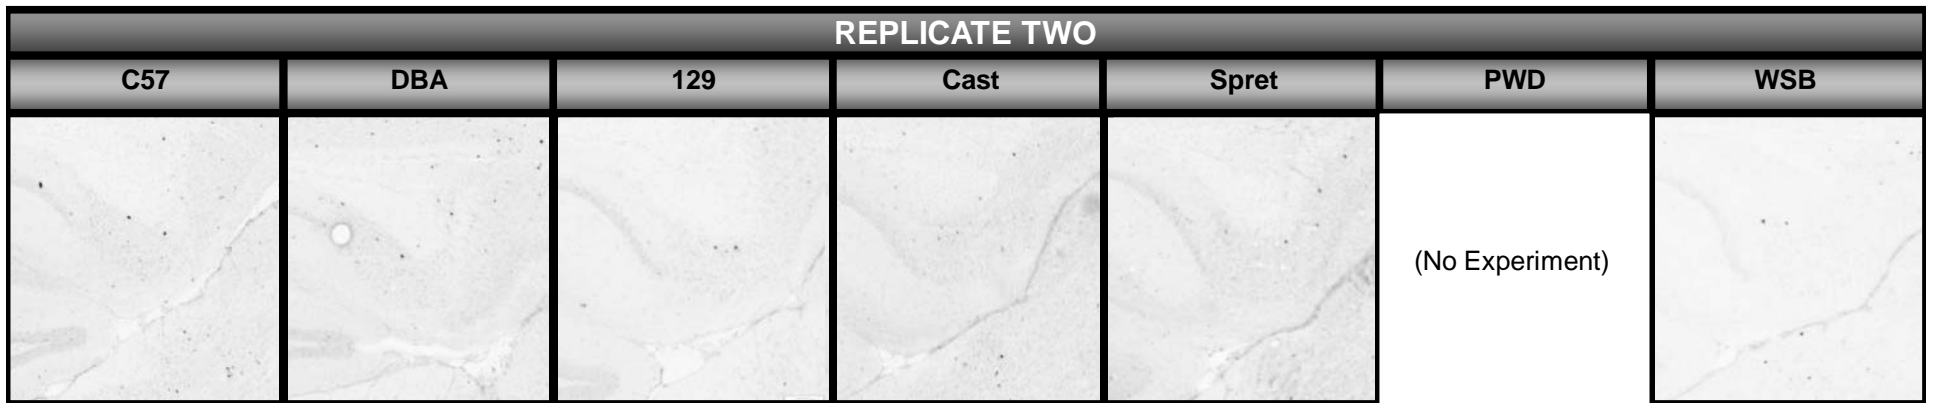

SUB: ... < PWD

*The PWD strain shows greater density of tyrosine hydroxylase (Th) expression in the subiculum*

## Th

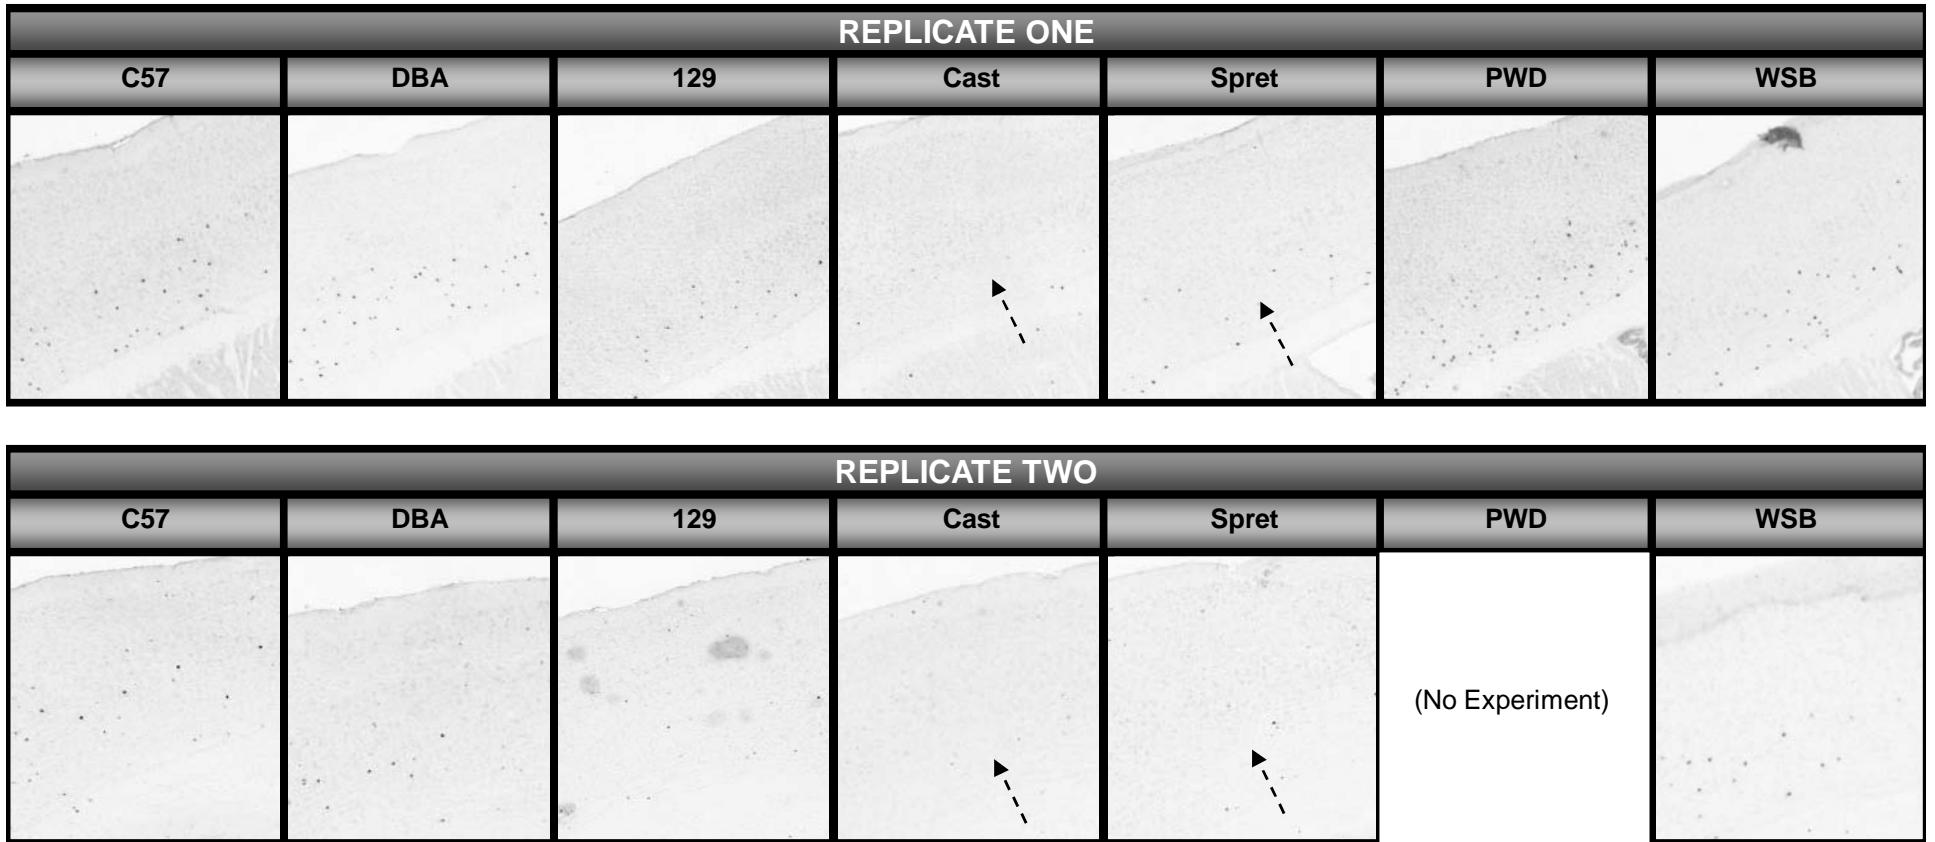

CTX(6a): Cast, Spret < ...

*The Cast and Spret strains show lower density of tyrosine hydroxylase (Th) expression in layer 6 of the cerebral cortex*

## Th

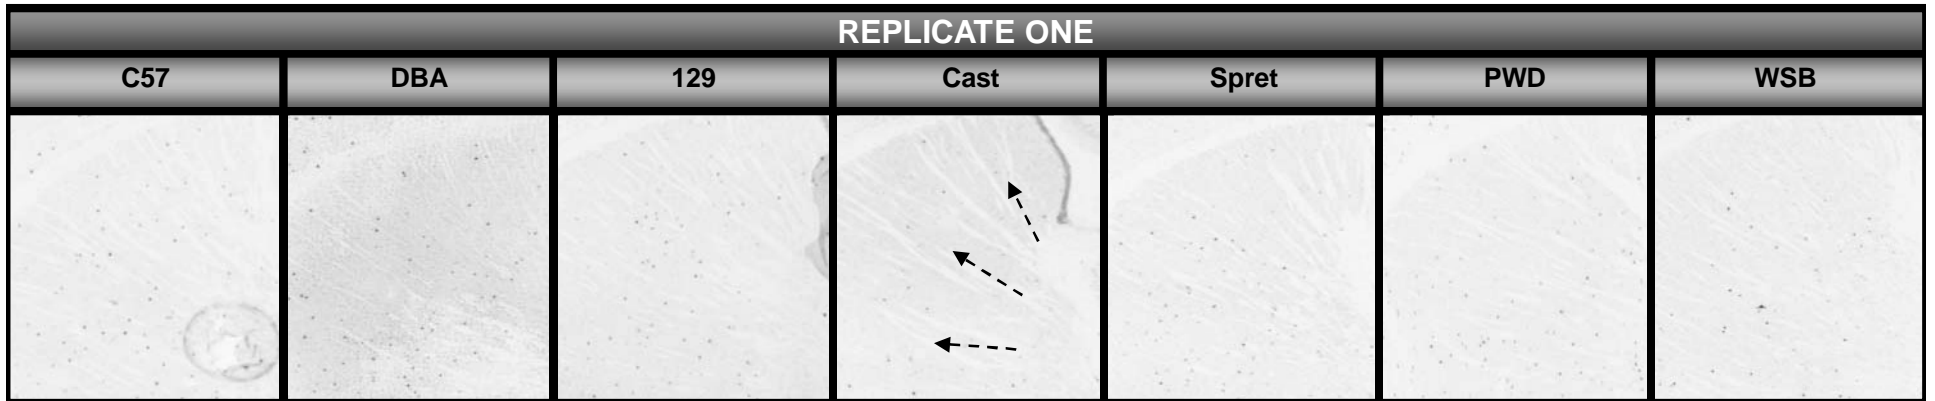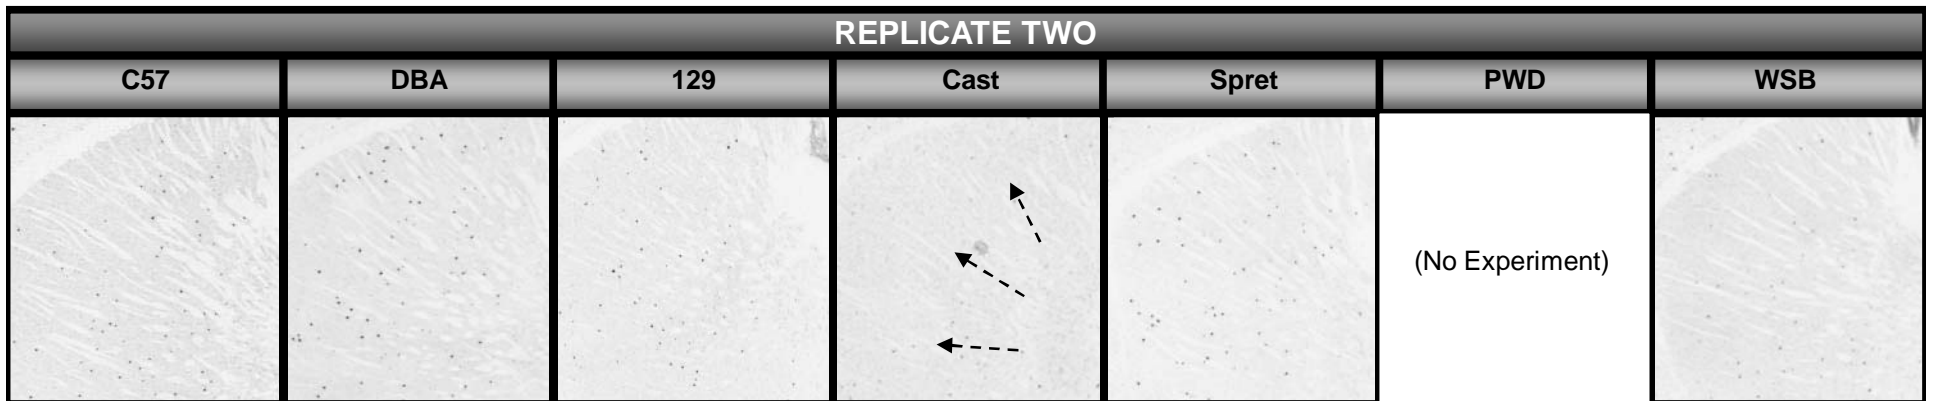

CP: Cast < ...

*The Cast strain shows lower density of tyrosine hydroxylase (Th) expression in the caudate putamen*

## Th

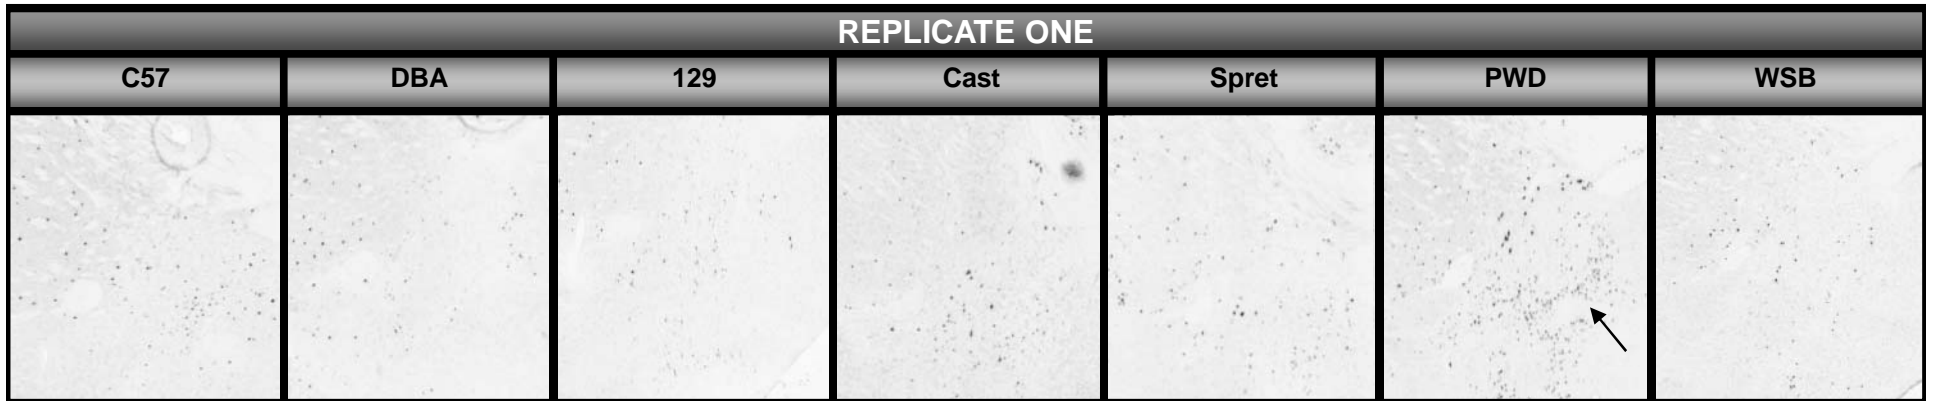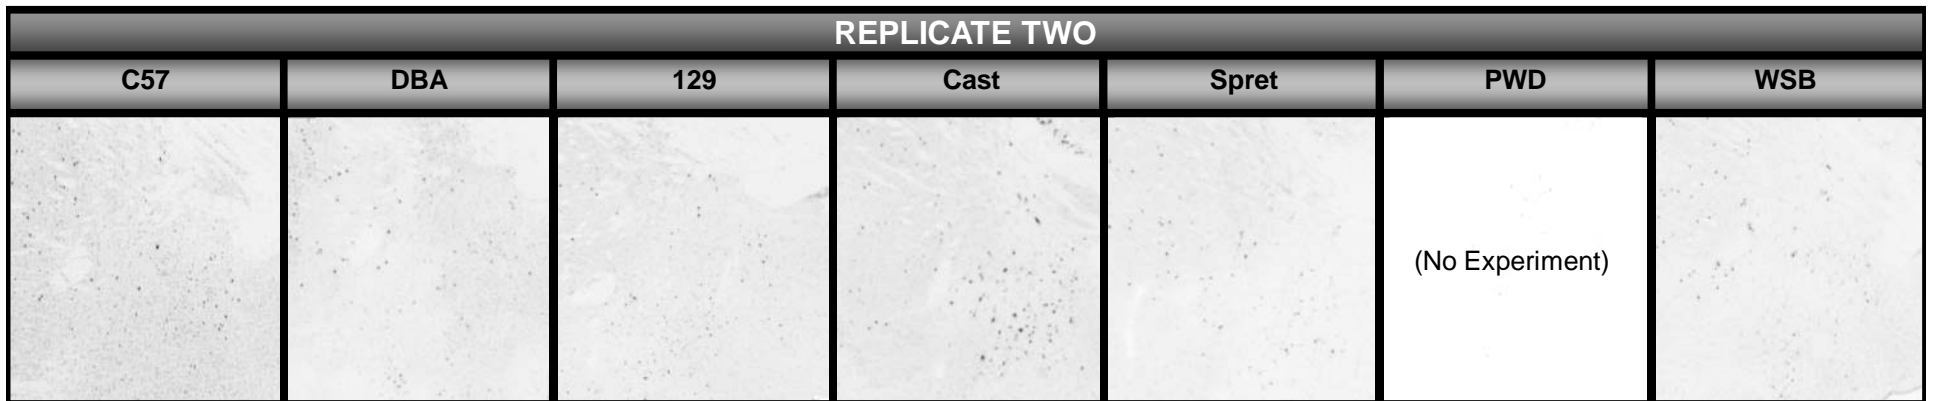

MEA: ... < PWD

*The PWD strain shows greater density and intensity of tyrosine hydroxylase (Th) expression in the medial amygdalar*



## Th

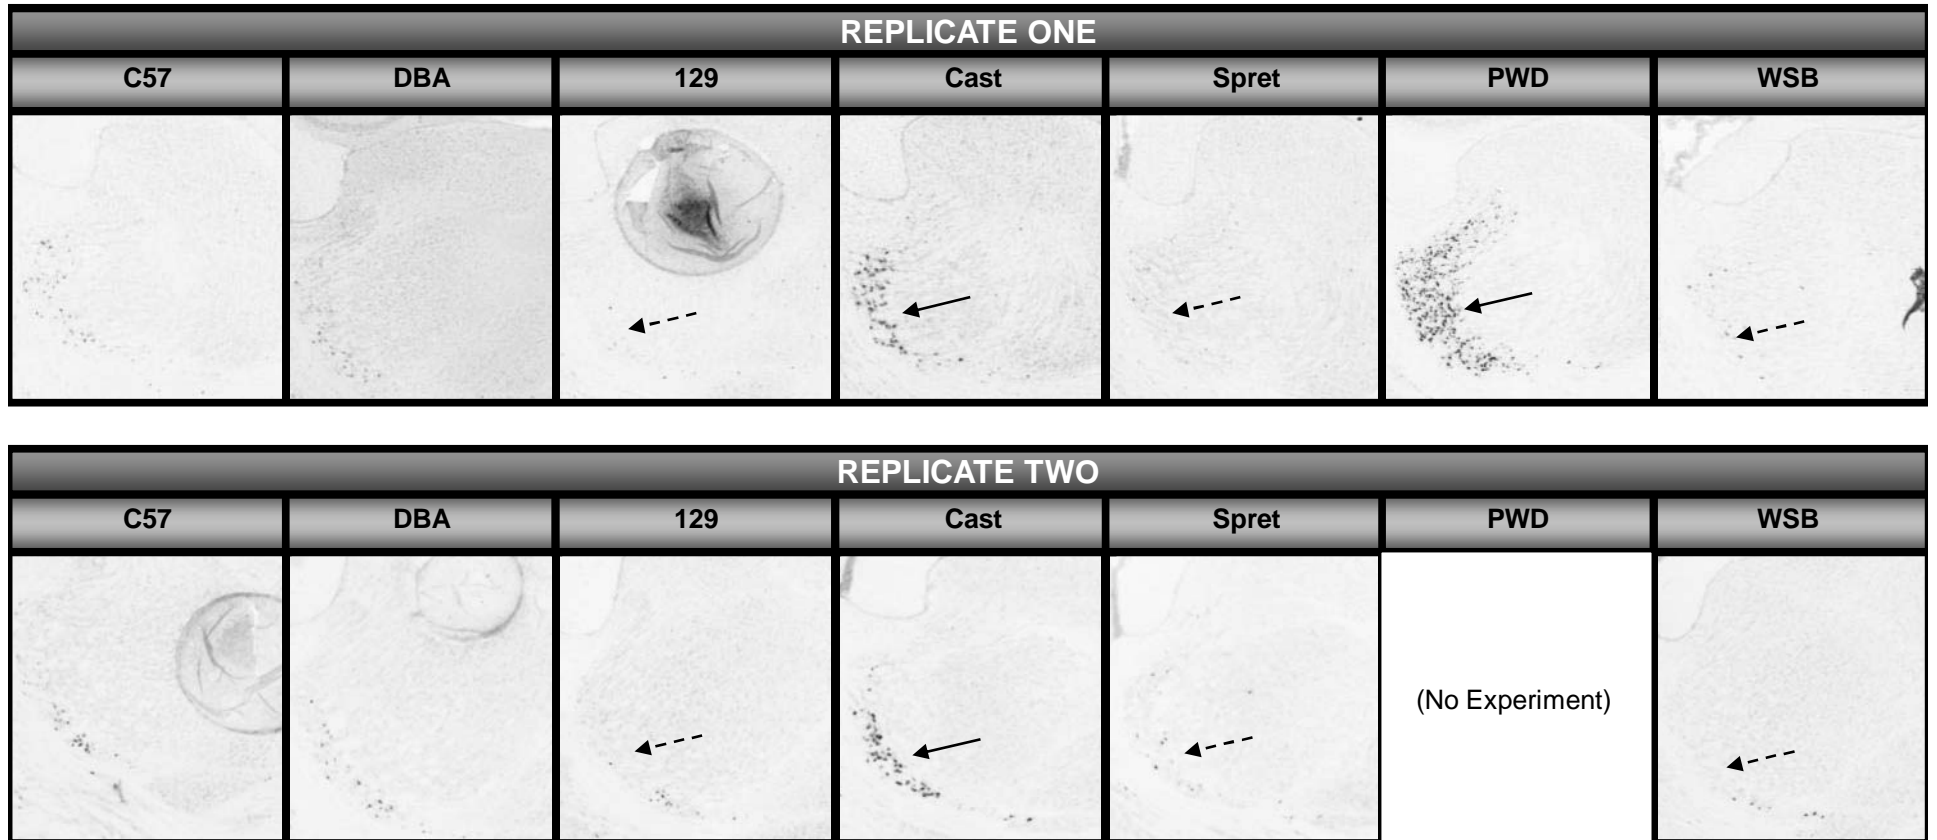

RT: 129, Spret, WSB < ... < Cast, PWD

*The 129, Spret and WSB strains show lower density and intensity of tyrosine hydroxylase (Th) expression in the reticular nucleus of the thalamus; the Cast and PWD strains show greater*

## Th

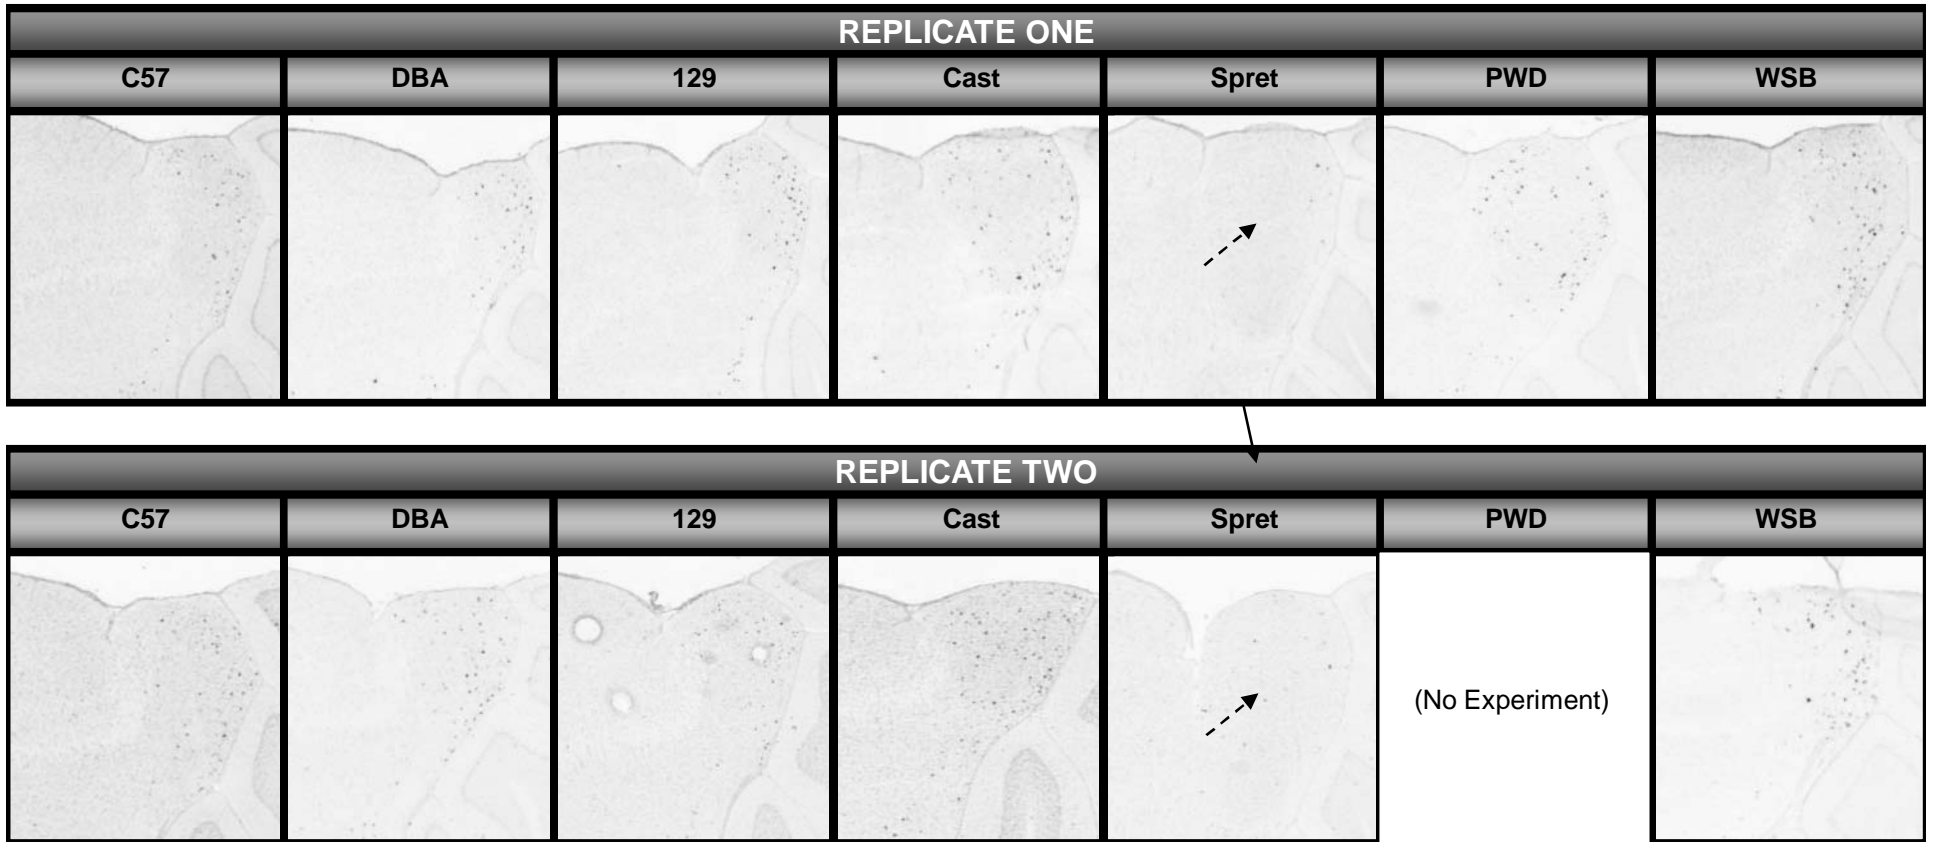

IC: Spret &lt; ...

*The Spret strain shows lower density of tyrosine hydroxylase (Th) expression in the inferior colliculus*

## Th

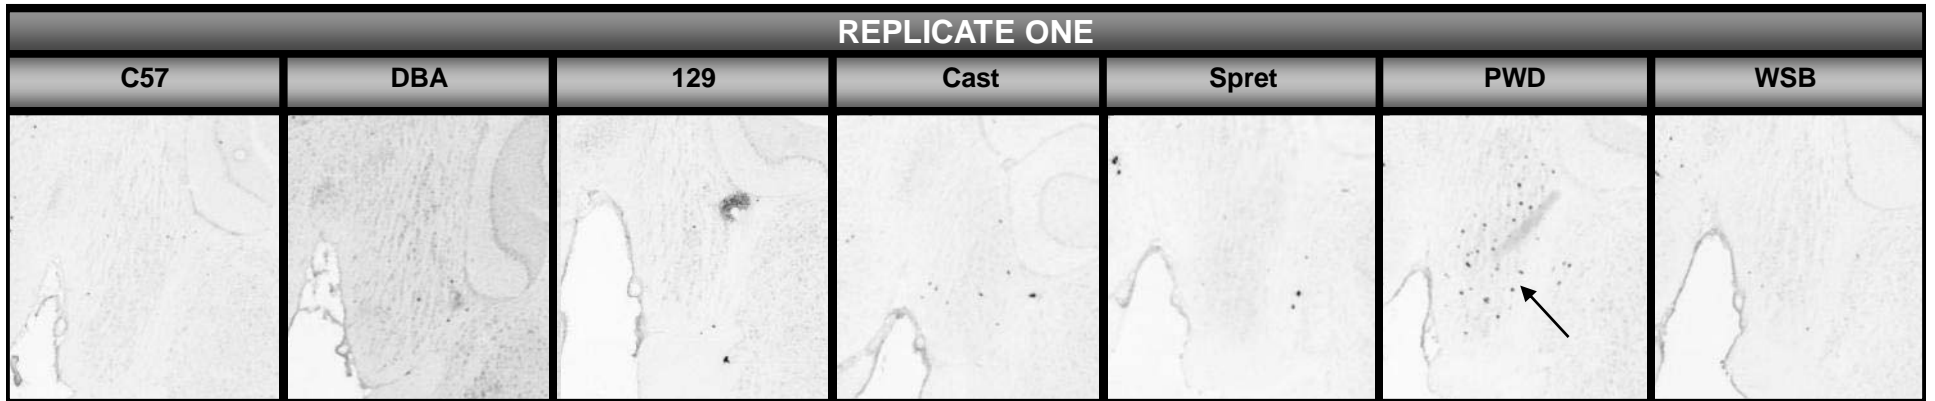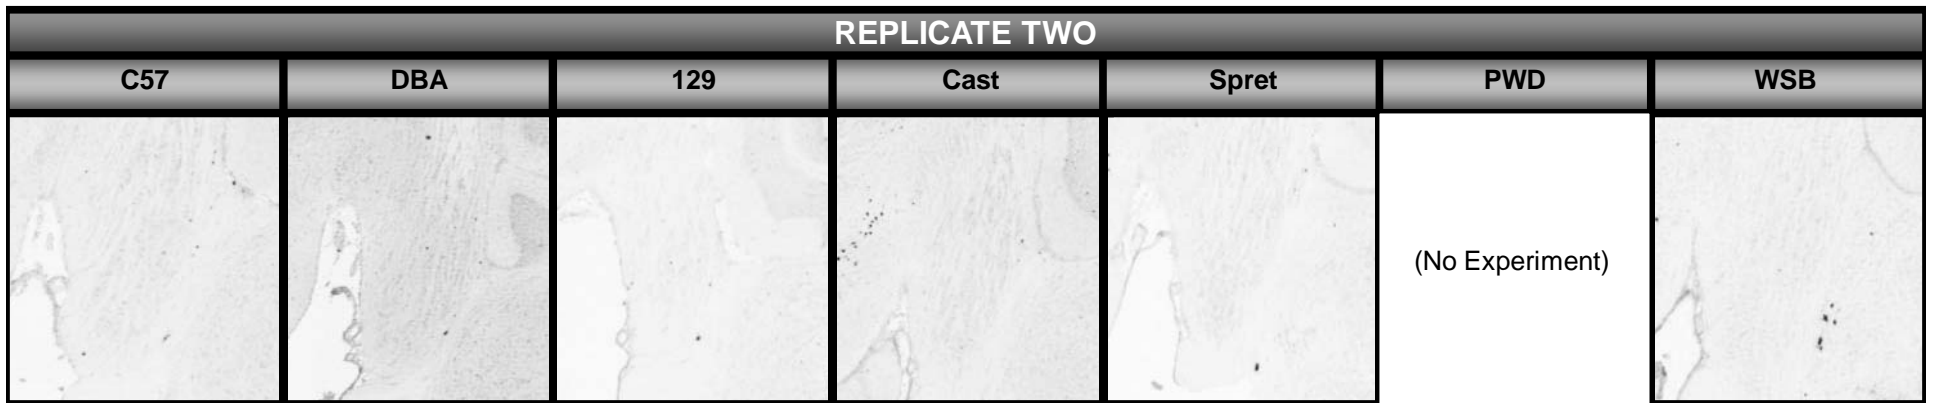

NLL: ... < PWD

*The PWD strain shows greater density and intensity of tyrosine hydroxylase (Th) expression in the nucleus of the lateral lemniscus*

## Th

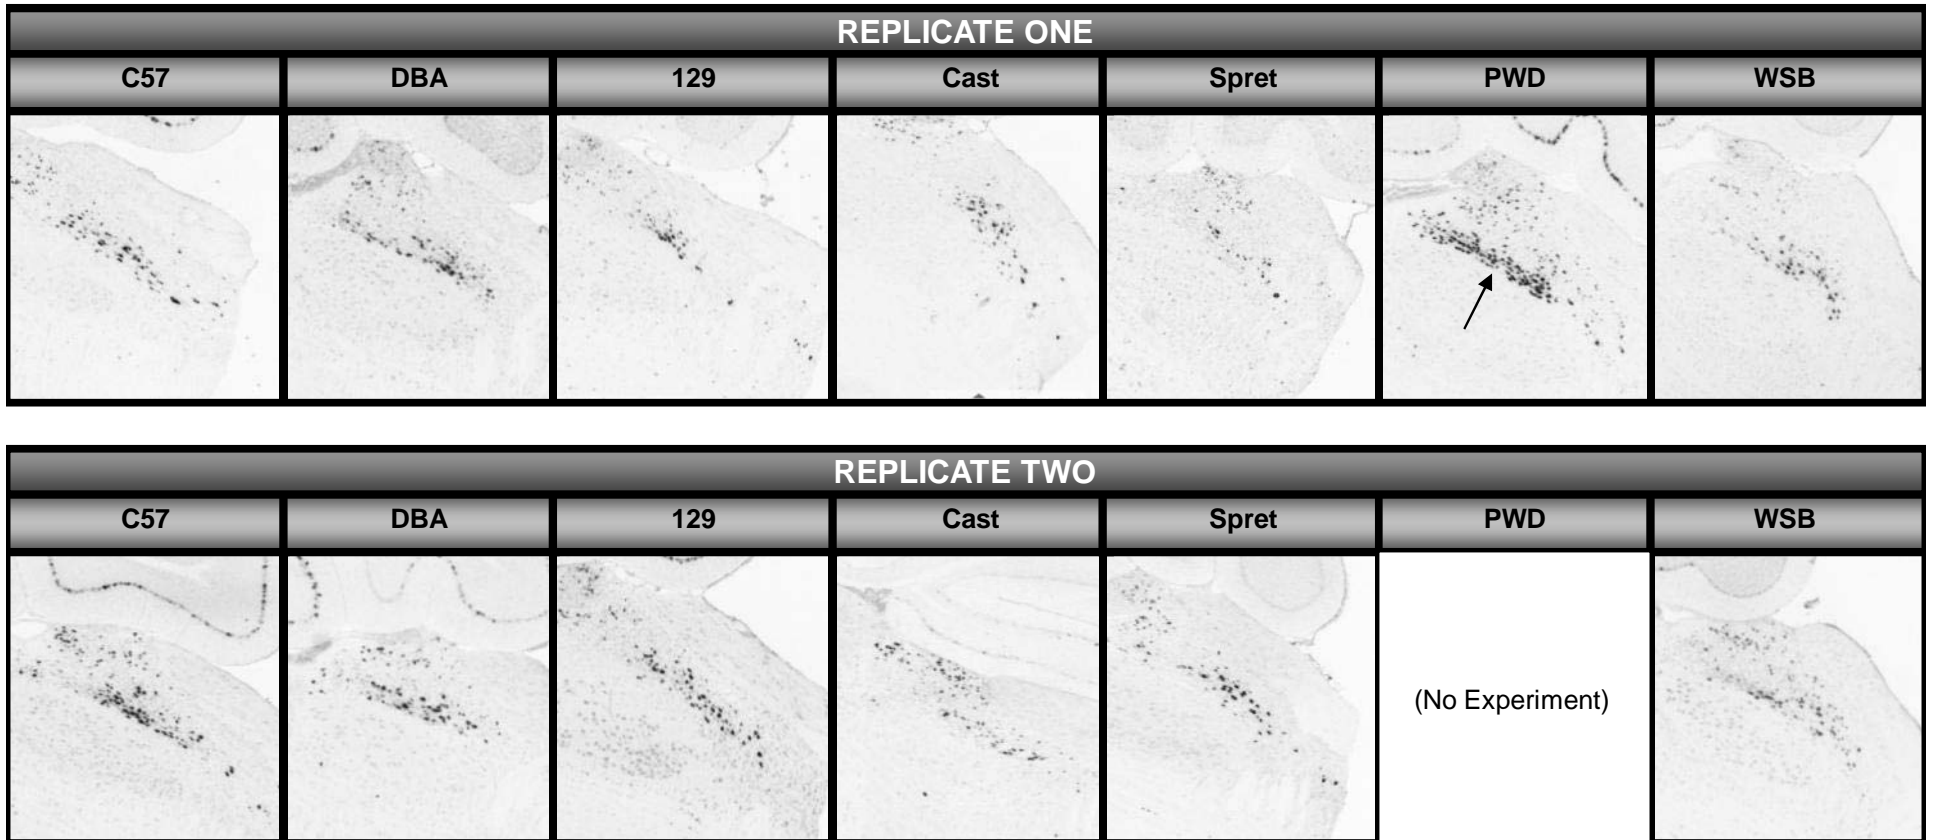

DMX: ... &lt; PWD

*The PWD strain shows greater density of tyrosine hydroxylase (Th) expression in the dorsal motor nucleus of the vagus*

## Th

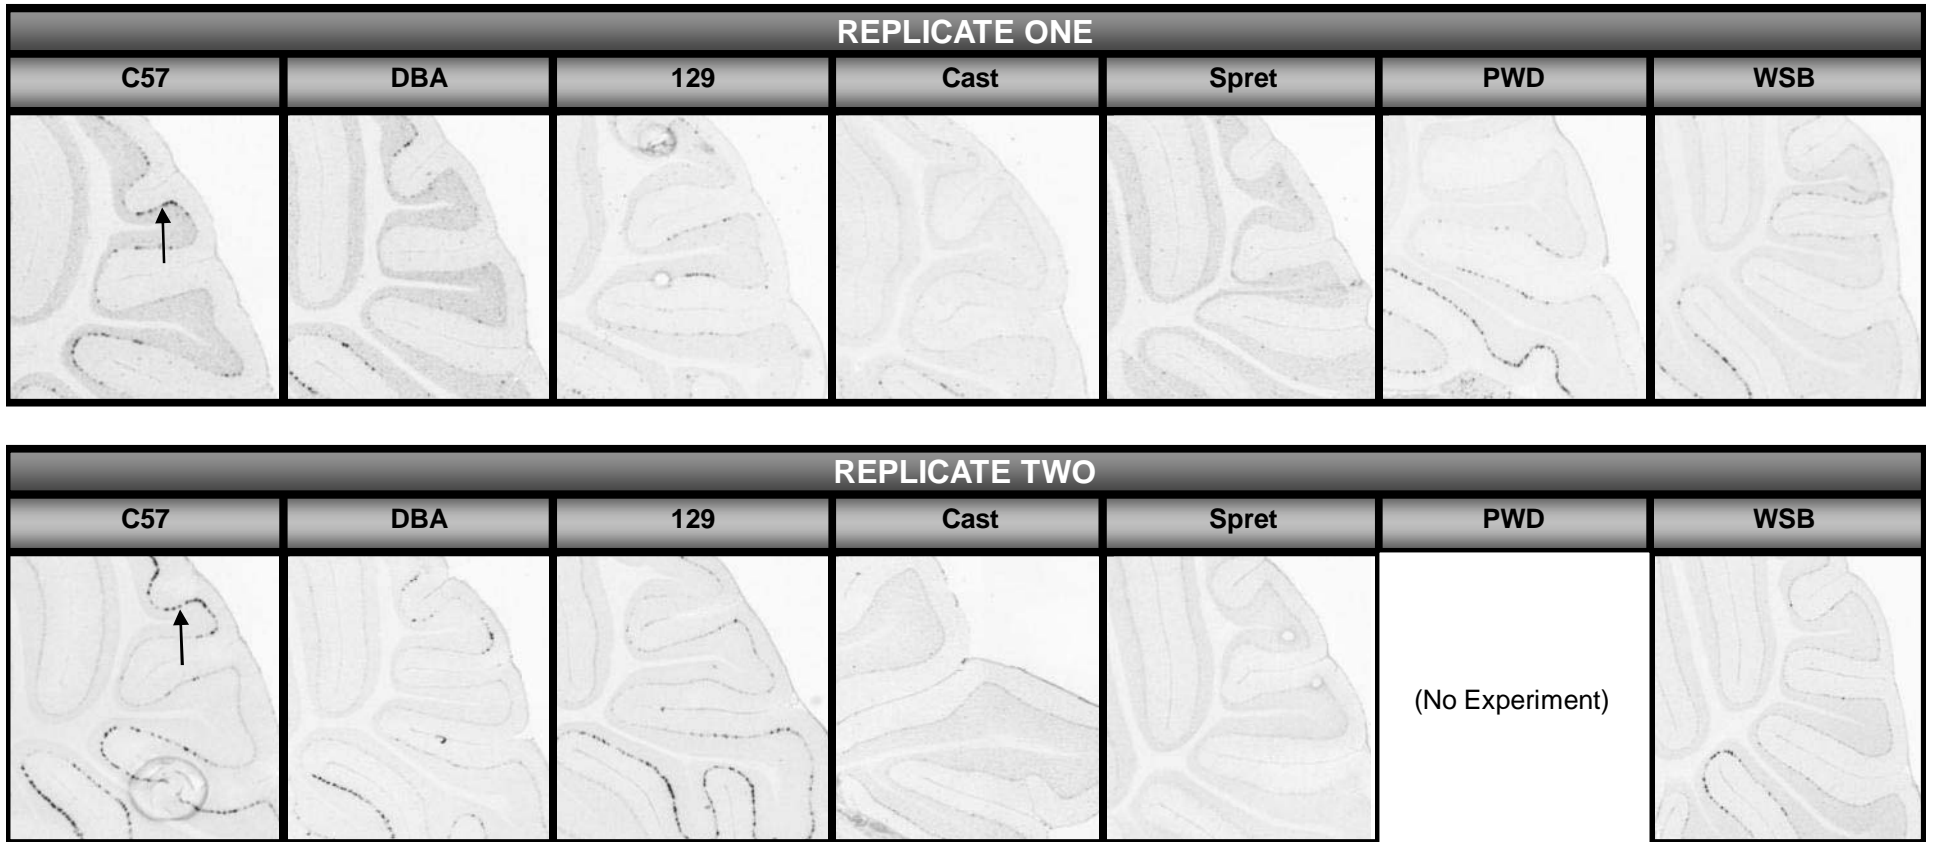

CBX(purk): ... < C57

*The C57 strain shows greater density of tyrosine hydroxylase (Th) expression in the purkinje layer of the cerebellar cortex*

# SUMMARY

- 49 DRUG TARGETS -

| Page | Gene    | Structure | Region | DBA | 129 | Cast | Spret | PWD | WSB |
|------|---------|-----------|--------|-----|-----|------|-------|-----|-----|
| 2    | Ache    | PO        | TH     | +   |     |      | +     |     | +   |
| 3    | Ache    | CBX(gr)   | CB     |     |     |      |       | +   |     |
| 4    | Adra2a  | DG(po)    | HPF    |     |     |      |       |     | +   |
| 5    | Adra2a  | CBX(gr)   | CB     |     |     |      |       | +   |     |
| 6    | Agtr1a  | PVH       | HY     |     |     |      | -     | -   |     |
| 7    | Bche    | ENTm      | HPF    |     |     |      | -     | -   |     |
| 8    | Bche    | AD        | TH     |     |     | +    |       |     | +   |
| 9    | Bche    | LD        | TH     |     |     | +    |       | +   |     |
| 10   | Bche    | AV        | TH     |     |     | +    |       | +   |     |
| 11   | Bche    | RE        | TH     |     |     | +    |       | +   |     |
| 12   | Bche    | MH        | TH     |     |     | +    |       |     |     |
| 13   | Bche    | PCG       | P      |     |     |      |       |     |     |
| 14   | Bche    | DMX       | MY     |     |     |      |       |     |     |
| 15   | Cyp19a1 | LS        | SUBC   |     |     |      |       | +   | -   |
| 16   | Drd1a   | CA2sp     | HPF    | +   | +   |      |       |     |     |
| 17   | Drd1a   | AD        | TH     |     |     |      | +     |     |     |
| 18   | Drd1a   | PB        | P      |     |     | -    |       |     |     |
| 19   | Drd2    | ENTl      | HPF    | +   |     |      |       |     |     |
| 20a  | Drd2    | LD        | TH     | -   |     | -    |       |     |     |
| 20b  | Drd2    | AV        | TH     |     |     | -    |       |     |     |
| 21   | Egfr    | DG(sg)    | HPF    |     |     | +    |       |     |     |
| 22   | Egfr    | PA        | CTX    |     |     | +    |       |     |     |
| 23   | Egfr    | LSc       | SUBC   |     |     | +    | +     |     |     |
| 24   | Egfr    | SCs       | MB     |     |     |      | +     |     |     |
| 25   | Esr1    | COAp      | OLF    |     |     |      |       |     |     |
| 26a  | Esr1    | CA2sp     | HPF    |     |     |      |       | +   |     |
| 26b  | Esr1    | DG(po)    | HPF    |     |     |      |       | +   |     |
| 27   | Esr1    | MO(2/3)   | CTX    | +   |     |      |       |     |     |
| 28   | Esr1    | PIR(2)    | OLF    |     |     |      | +     |     |     |
| 29   | Esr1    | DR        | MB     |     |     |      | -     |     |     |
| 30   | Esr1    | AP        | MY     |     |     |      | -     |     |     |
| 31   | Esr2    | CLA       | CTX    | +   |     | +    | -     |     |     |
| 32   | Esr2    | BLA       | CTX    |     |     |      | -     | -   |     |
| 33   | Esr2    | RE        | TH     |     |     |      | +     | +   |     |
| 34   | Esr2    | SCN       | HY     |     |     |      | +     |     |     |
| 35   | Faah    | AOBmi     | OLF    |     |     | -    |       |     |     |
| 36   | Gabra3  | CBX(gr)   | CB     |     |     |      |       | +   |     |
| 37   | Gabrb1  | SCs       | MB     |     |     |      | -     |     |     |
| 38   | Gnrh1   | MPO       | HY     |     |     | -    |       |     |     |
| 39   | Hrh1    | SCs       | MB     |     |     | +    |       |     |     |
| 40   | Htr1a   | AOB       | OLF    |     |     |      |       | +   | +   |
| 41   | Htr1a   | MOBmi     | OLF    |     |     | -    |       | -   |     |
| 42   | Htr1a   | CA3sp     | HPF    |     |     | +    | +     |     |     |
| 43   | Htr1a   | SUB       | HPF    |     |     |      | +     | +   |     |

| Page | Gene   | Structure | Macro | DBA | 129 | Cast | Spret | PWD | WSB |
|------|--------|-----------|-------|-----|-----|------|-------|-----|-----|
| 44   | Htr1a  | VIS(5)    | CTX   |     |     |      |       | -   |     |
| 45   | Htr1a  | RSPd(5)   | CTX   |     |     |      |       | -   |     |
| 46   | Htr1a  | CP        | SUBC  |     |     | +    | +     |     |     |
| 47   | Htr1a  | FN        | CB    |     |     |      |       | -   |     |
| 48   | Htr1b  | PIR(2)    | OLF   |     |     |      |       | -   | +   |
| 49   | Htr1b  | DG(po)    | HPF   | +   | +   | +    | +     | +   | +   |
| 50   | Htr1b  | POST      | HPF   |     |     |      |       | +   |     |
| 51   | Htr1b  | AV        | TH    |     |     |      |       | -   |     |
| 52   | Htr2a  | MO(2/3)   | CTX   |     |     | -    |       |     |     |
| 53   | Htr2a  | AD        | TH    |     |     | -    |       |     |     |
| 54   | Maob   | MOBmi     | OLF   |     |     |      |       |     | +   |
| 55   | Maob   | MO(2/3)   | CTX   |     |     |      |       |     | +   |
| 56   | Maob   | CTX(6b)   | CTX   |     |     |      |       | -   |     |
| 57   | Maob   | LA        | CTX   |     |     |      |       |     | +   |
| 58   | Maob   | LSr       | SUBC  |     |     | +    |       |     |     |
| 59   | Maob   | RE        | TH    |     |     |      |       | +   |     |
| 60   | Oprm1  | CP        | SUBC  |     |     |      |       |     | +   |
| 61   | Oprm1  | MS        | SUBC  |     |     |      |       |     | +   |
| 62a  | Oprm1  | VAL       | TH    |     |     |      |       | +   |     |
| 62b  | Oprm1  | VPL       | TH    |     |     |      |       | +   |     |
| 63   | Pdgfrb | PF        | TH    |     |     |      |       |     | -   |
| 64   | Ppp3ca | MG        | TH    | +   |     | +    | +     |     | +   |
| 65   | Ptgs2  | TTv       | OLF   | -   |     | +    |       |     |     |
| 66   | Ptgs2  | COA       | OLF   | -   |     |      |       |     | -   |
| 67a  | Ptgs2  | CA3sp     | HPF   |     |     |      |       | -   | +   |
| 67b  | Ptgs2  | DG        | HPF   | -   |     |      |       | +   | -   |
| 68   | Ptgs2  | VIS(2/3)  | CTX   | -   |     |      |       |     | -   |
| 69   | Ptgs2  | CLA       | CTX   |     |     |      |       |     | -   |
| 70   | Ptgs2  | IA        | SUBC  |     |     | -    |       |     |     |
| 71   | Scn10a | Epd       | CTX   | -   | -   | -    | -     | -   | -   |
| 72   | Scn10a | CEA       | SUBC  |     |     |      |       | -   |     |
| 73   | Slc6a1 | CBX(mo)   | CB    |     |     |      |       | -   | -   |
| 74   | Th     | AOBgr     | OLF   |     |     | -    |       | -   | -   |
| 75   | Th     | MOBgr     | OLF   |     |     |      |       | -   |     |
| 76   | Th     | SUB       | HPF   |     |     |      |       |     | +   |
| 77   | Th     | CTX(6a)   | CTX   |     |     | -    | -     |     |     |
| 78   | Th     | CP        | SUBC  |     |     | -    |       |     |     |
| 79   | Th     | MEA       | SUBC  |     |     |      |       |     | +   |
| 80   | Th     | RT        | TH    |     | -   | +    | -     | +   | -   |
| 81   | Th     | IC        | MB    |     |     |      |       | -   |     |
| 82   | Th     | NLL       | P     |     |     |      |       |     | +   |
| 83   | Th     | DMX       | MY    |     |     |      |       |     | +   |
| 84   | Th     | CBX(purk) | CB    | -   | -   | -    | -     | -   | -   |
