# Supplementary material
Source: PubMed Central journal article supplement (PMC2973884)

# Supplemental Figure 3

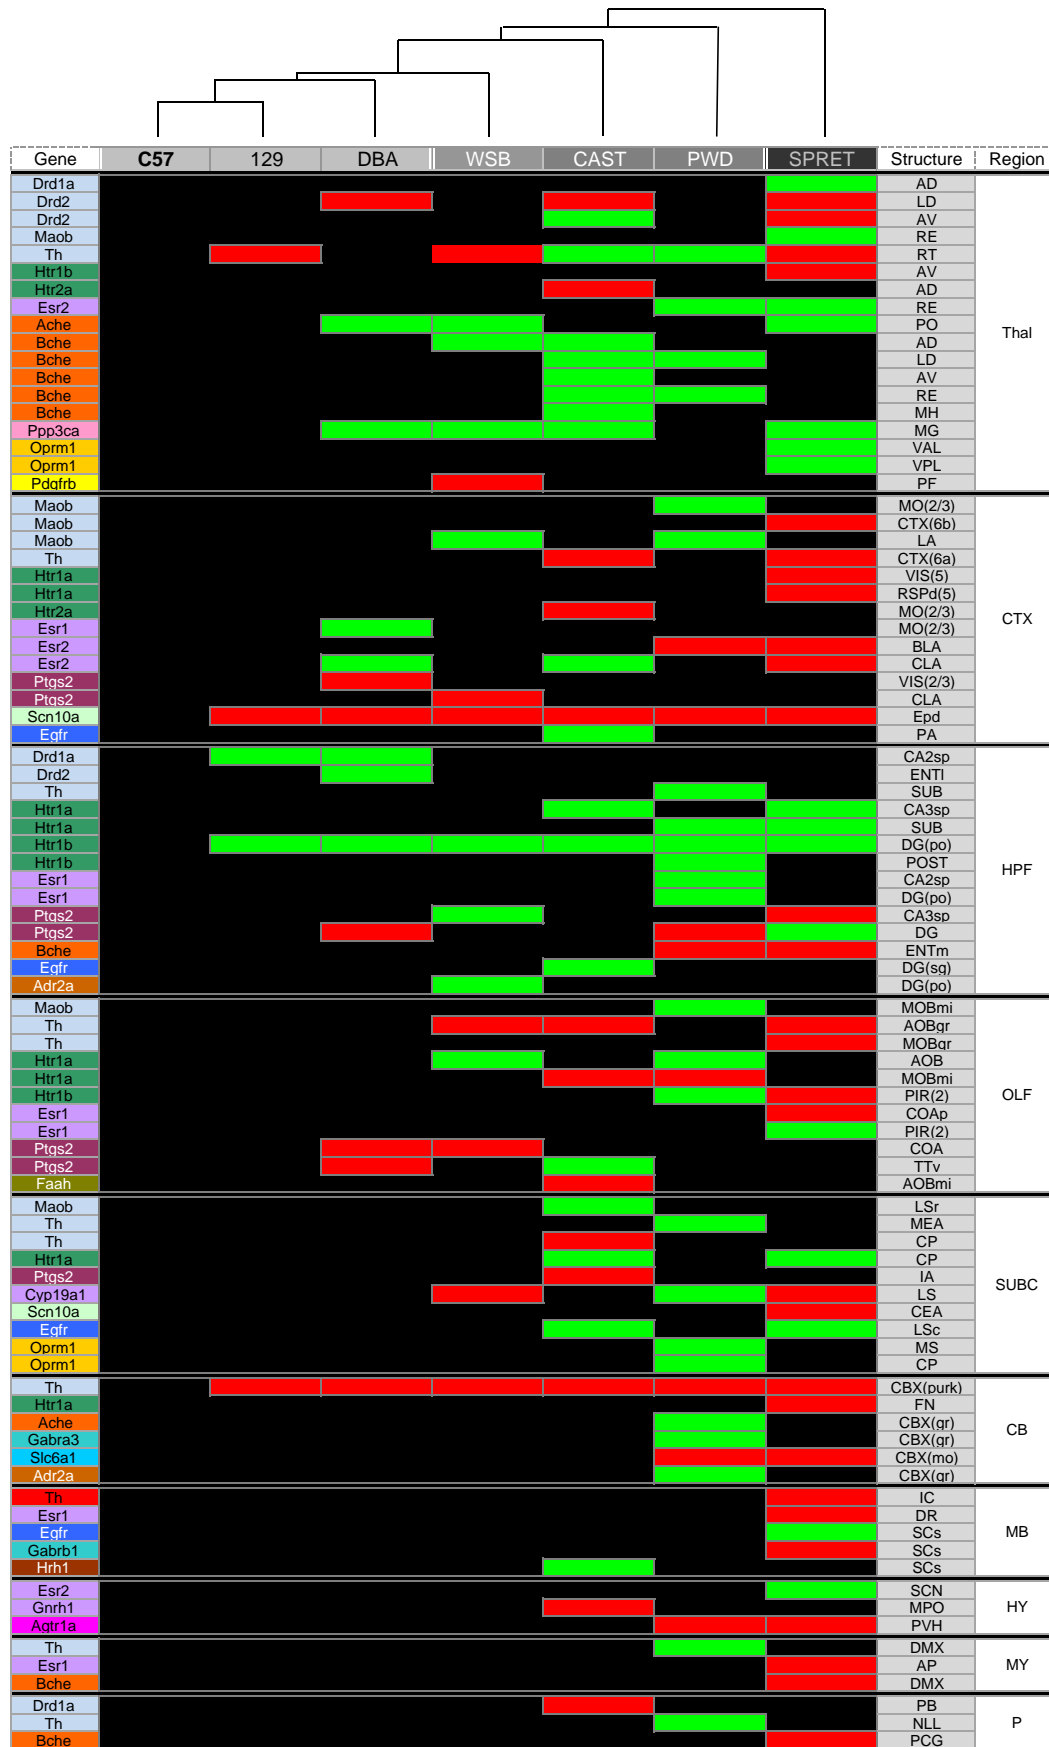

| Category      | Genes | Differences |
|---------------|-------|-------------|
| Dopamine      | 6     | 23          |
| Serotonin     | 4     | 14          |
| Hormone       | 6     | 13          |
| Cholinergic   | 4     | 10          |
| Prostaglandin | 1     | 7           |
| EGF           | 1     | 4           |
| Opioid        | 2     | 4           |
| GABA          | 6     | 3           |
| Adrenergic    | 4     | 2           |
| Ion Channel   | 2     | 2           |
| Angiotensin   | 1     | 1           |
| Histamine     | 1     | 1           |
| Hydrolase     | 1     | 1           |
| PDGF          | 2     | 1           |
| Phosphatase   | 2     | 1           |

|             |   |   |
|-------------|---|---|
| Kinase      | 2 | 0 |
| Oncogene    | 1 | 0 |
| Cannabinoid | 1 | 0 |
| DNA enzyme  | 1 | 0 |
| Endothelin  | 1 | 0 |

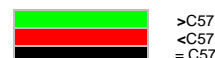

Supplement: 1003732107_sfig03.pdf [file 1003732107_sfig03.pdf]
