# Supplementary material
Source: PubMed Central journal article supplement (PMC2973884)

# Tyrosine Hydroxylase (Th)

Supplemental Figure 2

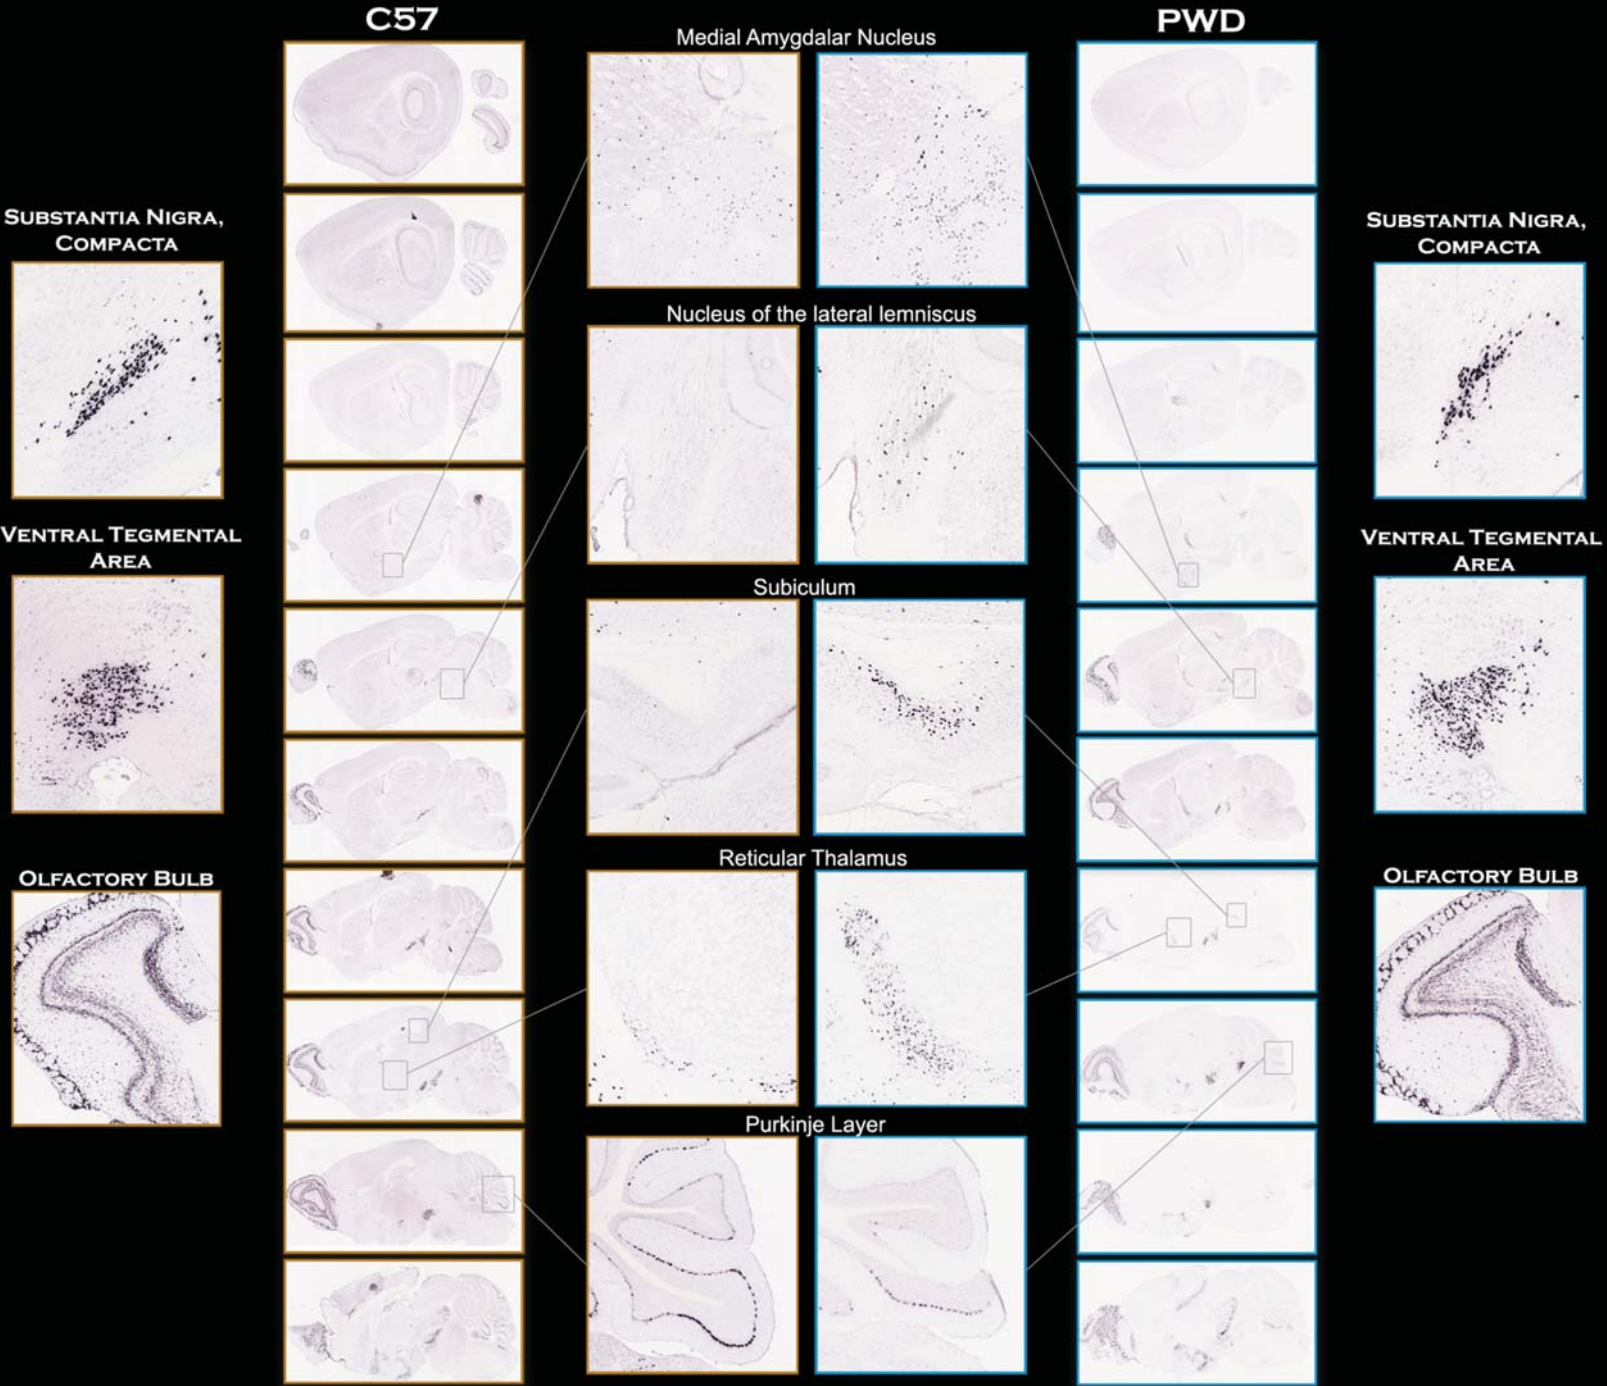

Supplement: 1003732107_sfig02.pdf [file 1003732107_sfig02.pdf]

# Supplemental Figure 4

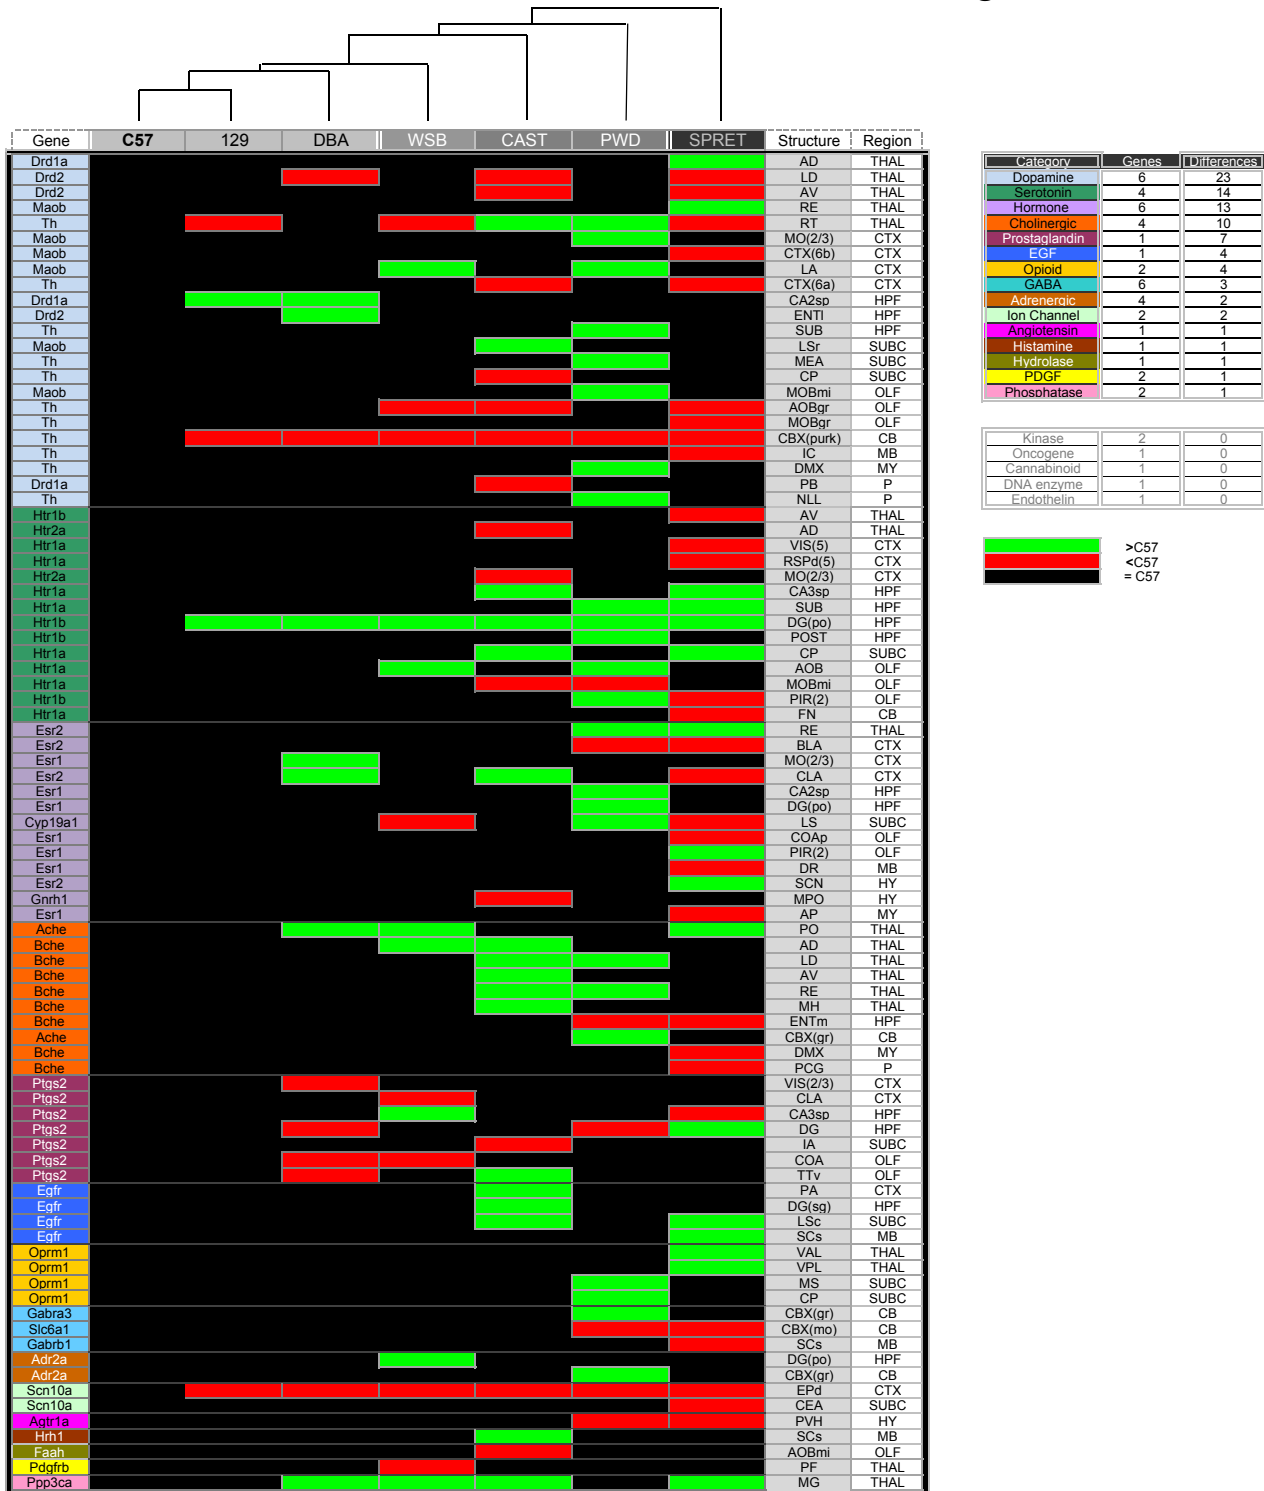

Supplement: 1003732107_sfig04.pdf [file 1003732107_sfig04.pdf]
